# Supplementary material for: Comprehensive annotations of human herpesvirus 6A and 6B genomes reveal novel and conserved genomic features
Source: eLife. 2020 Jan 16;9:e50960. doi: 10.7554/eLife.50960 (PMC6964970; doi:10.7554/eLife.50960)
Supplement: Figure 7—source data 1. [file elife-50960-fig7-data1.xlsx]

## Sheet: fp_rpm_reads_clusters_5hpi_norm
Figure 7-Source Data 1: CHX Ribo-seq density and kinetic clusters of SVM predicted HHV-6B ORFs
Raw ribosome footprint reads and normalized reads of each HHV-6B ORF (identified by ORF ID and canonical gene name in barckets where aplicable) at the indicated time points.
Kinetic class as described by Tsao et al. 2009 and cluster number as identified are shown here.
id_(canonical_ORF)	fp_reads_5hr	fp_reads_24hr	fp_reads_72hr	log2 rpm_5hr	log2 rpm_24hr	log2 rpm_72hr	kinetic_class	cluster
ORF107C_(U90)	1095	1942	6844	14.2693	8.95623	8.4023	IE	1
ORF108W_(U95)	968	5177	10580	14.0914	10.369	9.02922	IE	1
ORF99W.iORF1	150	6681	3589	11.4018	10.7367	7.4749	#N/A	1
ORF99W.iORF2	163	7121	3773	11.5217	10.8287	7.54664	#N/A	1
ORF99W_(U79)	181	8052	4384	11.6728	11.0058	7.7621	IE	1
rORF111	8	24	253	7.18245	2.83311	3.75169	#N/A	1
ORF100W	3	121	147	0	4.99483	3.0436	#N/A	2
ORF101C_(U81)	6	5432	6704	6.77072	10.4383	8.37257	E	2
ORF104C.iORF1	0	466	714	0	6.90626	5.17761	#N/A	2
ORF104C_(U84)	4	1139	1860	0	8.1885	6.53414	#N/A	2
ORF105C.iORF1	0	142	228	0	5.21901	3.61328	#N/A	2
ORF105C_(U85)	1	2266	3296	0	9.17842	7.35276	IE	2
ORF13W_(U12)	0	819	568	0	7.7146	4.85778	E	2
ORF14W_(U13)	0	219	252	0	5.83037	3.7464	#N/A	2
ORF16C_(U15)	7	1625	4816	6.99122	8.6997	7.89709	E	2
ORF18C_(U17)	1	1378	1726	0	8.46246	6.42748	E	2
ORF19C.iORF1	3	416	1003	0	6.74396	5.6564	#N/A	2
ORF19C_(U18)	3	419	1014	0	6.75423	5.67183	E	2
ORF1C.iORF2	0	48	130	0	3.72815	2.889	#N/A	2
ORF20C.iORF1	2	3215	2599	0	9.68236	7.01236	#N/A	2
ORF20C_(U19)	2	4367	3350	0	10.1237	7.37606	E	2
ORF21C_(U20)	3	1307	1525	0	8.38636	6.25106	E	2
ORF22C	13	4048	9327	7.87906	10.0144	8.84774	#N/A	2
ORF25C_(U24)	0	625	1431	0	7.32673	6.16052	#N/A	2
ORF26C_(U24A)	2	1320	3822	0	8.4006	7.56515	#N/A	2
ORF29C.iORF1	4	1017	1825	0	8.02565	6.50703	#N/A	2
ORF29C_(U27)	19	8457	13962	8.42461	11.0766	9.42872	E	2
ORF2C.iORF1	0	343	411	0	6.46845	4.40991	#N/A	2
ORF2C.iORF2	2	583	611	0	7.22701	4.95956	#N/A	2
ORF2C.iORF3	2	690	680	0	7.46862	5.10921	#N/A	2
ORF2C_(U3)	5	1233	1160	0	8.30253	5.86233	E	2
ORF30C.iORF1	1	175	652	0	5.51315	5.05034	#N/A	2
ORF30C_(U28)	8	737	2631	7.18245	7.56317	7.02988	E	2
ORF33W_(U31)	9	1347	6024	7.35127	8.42972	8.21876	L	2
ORF36C_(U34)	11	1916	8884	7.63917	8.93683	8.77769	E	2
ORF38W.iORF1	0	138	409	0	5.17891	4.40321	#N/A	2
ORF38W_(U36)	7	983	4390	6.99122	7.97679	7.76406	E	2
ORF3C_(U4)	6	744	3328	6.77072	7.57673	7.36661	#N/A	2
ORF41C.iORF1	1	1548	1825	0	8.62984	6.50703	#N/A	2
ORF41C_(U38)	2	3536	2673	0	9.8195	7.05256	U	2
ORF45W	0	15	27	0	2.27166	1.22082	#N/A	2
ORF46C_(U41)	20	16097	7864	8.4984	12.0049	8.60217	E	2
ORF47C_(U42)	16	4746	2654	8.17747	10.2437	7.04234	E	2
ORF48W	0	12	31	0	2.02256	1.33797	#N/A	2
ORF49C	0	42	88	0	3.55098	2.41614	#N/A	2
ORF4C	11	3270	3561	7.63917	9.7068	7.46367	#N/A	2
ORF4C.iORF1	1	155	413	0	5.34214	4.41659	#N/A	2
ORF4C.iORF2	3	134	165	0	5.13766	3.19103	#N/A	2
ORF53C.iORF1	0	121	260	0	4.99483	3.78817	#N/A	2
ORF53C_(U43)	2	1289	1770	0	8.36641	6.46338	L	2
ORF5W	0	18	31	0	2.48402	1.33797	#N/A	2
ORF67W	8	1594	2761	7.18245	8.67198	7.09894	#N/A	2
ORF68W_(U51)	11	3876	7347	7.63917	9.95181	8.50432	E	2
ORF6W	0	26	47	0	2.93293	1.72969	#N/A	2
ORF6W.iORF1	0	18	27	0	2.48402	1.22082	#N/A	2
ORF71C.iORF1	2	456	805	0	6.87523	5.34616	#N/A	2
ORF71C_(U52)	2	745	1499	0	7.57866	6.22658	#N/A	2
ORF78W_(U62)	0	571	455	0	7.19721	4.55006	#N/A	2
ORF79W	0	361	654	0	6.54143	5.05463	#N/A	2
ORF79W.iORF1	0	327	594	0	6.40033	4.92018	#N/A	2
ORF86W.iORF1	6	3752	5720	6.77072	9.90495	8.14431	#N/A	2
ORF86W_(U69)	6	4411	6242	6.77072	10.1382	8.26988	E	2
ORF87W_(U70)	21	3991	15391	8.5686	9.99395	9.5691	E	2
ORF8W_(U10)	5	1472	4810	0	8.5574	7.8953	#N/A	2
ORF90W.iORF1	4	1020	1830	0	8.02988	6.51094	#N/A	2
ORF90W_(U73)	5	1726	2749	0	8.78649	7.0927	E	2
ORF93W_(U74)	3	1036	1315	0	8.05225	6.04034	E	2
ORF95W_(U77)	0	609	668	0	7.28955	5.08427	U	2
rORF1	1	26	108	0	2.93293	2.66065	#N/A	2
rORF101	1	56	231	0	3.93491	3.63061	#N/A	2
rORF102	0	46	54	0	3.67148	1.87247	#N/A	2
rORF103	3	602	784	0	7.27298	5.30897	#N/A	2
rORF105	0	36	71	0	3.34896	2.16977	#N/A	2
rORF106	0	106	161	0	4.81028	3.15955	#N/A	2
rORF107	0	2	3	0	0.595032	0.198955	#N/A	2
rORF108	0	151	168	0	5.30536	3.21421	#N/A	2
rORF109	0	3	10	0	0.820288	0.578106	#N/A	2
rORF14	1	47	91	0	3.70009	2.45557	#N/A	2
rORF15	0	79	91	0	4.40361	2.45557	#N/A	2
rORF2	0	13	8	0	2.11046	0.479552	#N/A	2
rORF20	1	205	730	0	5.73679	5.20871	#N/A	2
rORF21	1	341	816	0	6.46011	5.36526	#N/A	2
rORF22	1	95	85	0	4.65816	2.37561	#N/A	2
rORF3	0	60	49	0	4.02814	1.77195	#N/A	2
rORF32	0	4	15	0	1.01508	0.798534	#N/A	2
rORF38	0	246	92	0	5.99531	2.46847	#N/A	2
rORF4	0	2	8	0	0.595032	0.479552	#N/A	2
rORF45	0	125	100	0	5.04031	2.56776	#N/A	2
rORF47	2	232	116	0	5.91214	2.74792	#N/A	2
rORF48	0	80	38	0	4.4209	1.52255	#N/A	2
rORF49	0	21	25	0	2.6691	1.15848	#N/A	2
rORF52	0	25	49	0	2.88388	1.77195	#N/A	2
rORF57	0	7	16	0	1.47859	0.838848	#N/A	2
rORF58	0	73	70	0	4.29524	2.15388	#N/A	2
rORF63	0	2	7	0	0.595032	0.427629	#N/A	2
rORF64	1	49	192	0	3.75568	3.38729	#N/A	2
rORF77	1	5	20	0	1.18667	0.989703	#N/A	2
rORF78	0	21	63	0	2.6691	2.03745	#N/A	2
rORF79	0	5	14	0	1.18667	0.75706	#N/A	2
rORF80	0	21	20	0	2.6691	0.989703	#N/A	2
rORF81	1	44	35	0	3.61249	1.44631	#N/A	2
rORF82	0	26	75	0	2.93293	2.23164	#N/A	2
rORF83	0	103	236	0	4.77036	3.65903	#N/A	2
rORF87	0	126	384	0	5.05145	4.31665	#N/A	2
rORF88	1	101	229	0	4.74311	3.61908	#N/A	2
rORF89	0	73	107	0	4.29524	2.64936	#N/A	2
rORF9	0	6	10	0	1.34	0.578106	#N/A	2
rORF91	1	35	126	0	3.31235	2.85008	#N/A	2
rORF95	0	17	61	0	2.41665	2.00238	#N/A	2
rORF96	0	15	52	0	2.27166	1.8331	#N/A	2
rORF98	0	184	641	0	5.58396	5.02654	#N/A	2
rORF99	1	238	871	0	5.94837	5.45715	#N/A	2
ORF102C_(U82)	11	1354	14834	7.63917	8.43718	9.516	E	3
ORF106C	5	62	526	0	4.07259	4.75092	#N/A	3
ORF10C	1	17	131	0	2.41665	2.89856	#N/A	3
ORF110C	1	74	507	0	4.31388	4.69985	#N/A	3
ORF111C.iORF2	3	334	6490	0	6.43053	8.32591	#N/A	3
ORF11W	0	1	12	0	0.327978	0.670356	#N/A	3
ORF12C.iORF1	0	119	849	0	4.97155	5.4211	#N/A	3
ORF12C_(U11)	16	2587	25399	8.17747	9.36925	10.291	L	3
ORF15W	8	3464	17858	7.18245	9.78985	9.78333	#N/A	3
ORF17C	0	51	331	0	3.8092	4.11392	#N/A	3
ORF1C.iORF1	0	112	467	0	4.88696	4.58604	#N/A	3
ORF1C_(U2)	1	149	609	0	5.28661	4.95498	U	3
ORF23C_(U22)	0	43	1033	0	3.58206	5.69809	L	3
ORF24C	2	626	6903	0	7.32902	8.41465	#N/A	3
ORF24C.iORF1	1	342	3635	0	6.46428	7.49317	#N/A	3
ORF24C.iORF2	0	42	506	0	3.55098	4.69711	#N/A	3
ORF24C.iORF3	1	559	5675	0	7.16678	8.13296	#N/A	3
ORF27C	8	979	5668	7.18245	7.97093	8.13118	#N/A	3
ORF27C.iORF1	2	329	2288	0	6.40902	6.83001	#N/A	3
ORF28C_(U26)	5	1343	5970	0	8.42545	8.20581	#N/A	3
ORF31W	3	735	6727	0	7.55927	8.3775	#N/A	3
ORF31W.iORF1	3	270	2091	0	6.1276	6.70131	#N/A	3
ORF31W.iORF2	2	77	679	0	4.36838	5.10715	#N/A	3
ORF32C_(U29)	5	884	5699	0	7.82428	8.13902	L	3
ORF35C	3	326	2885	0	6.39596	7.16187	#N/A	3
ORF35C.iORF1	1	178	2243	0	5.53714	6.80161	#N/A	3
ORF35C.iORF2	1	196	2333	0	5.67326	6.85787	#N/A	3
ORF35C.iORF3	1	105	1272	0	4.79709	5.99312	#N/A	3
ORF37C	1	72	350	0	4.27636	4.18991	#N/A	3
ORF39W	3	321	2644	0	6.37393	7.03694	#N/A	3
ORF40W_(U37)	10	2912	18171	7.50239	9.53973	9.80836	E	3
ORF42C_(U39)	15	1840	21068	8.0847	8.87856	10.0216	E	3
ORF43C_(U40)	4	743	6177	0	7.5748	8.25483	E	3
ORF44W	0	7	40	0	1.47859	1.57122	#N/A	3
ORF50W	0	3	47	0	0.820288	1.72969	#N/A	3
ORF51W	2	296	2048	0	6.25842	6.67163	#N/A	3
ORF52W	2	435	3224	0	6.80781	7.32109	#N/A	3
ORF54W	0	64	411	0	4.11571	4.40991	#N/A	3
ORF55W	3	724	4607	0	7.53763	7.83336	#N/A	3
ORF56W	3	863	5783	0	7.78975	8.16006	#N/A	3
ORF57W	1	12	550	0	2.02256	4.81295	#N/A	3
ORF58W	1	189	1612	0	5.62184	6.33008	#N/A	3
ORF59W	3	360	2624	0	6.53747	7.02607	#N/A	3
ORF62W	6	1175	8956	6.77072	8.23325	8.78931	#N/A	3
ORF63C_(U48)	18	2729	34946	8.34684	9.44623	10.7511	L	3
ORF64C	3	200	3220	0	5.70184	7.31931	#N/A	3
ORF65W_(U49)	2	463	3676	0	6.89702	7.50927	L	3
ORF66W.iORF1	0	96	510	0	4.67267	4.70804	#N/A	3
ORF66W_(U50)	7	578	3893	6.99122	7.21467	7.59157	L	3
ORF70W	0	3	22	0	0.820288	1.0596	#N/A	3
ORF72W.iORF1	12	2713	15116	7.7641	9.43775	9.54313	#N/A	3
ORF72W.iORF2	12	2674	14689	7.7641	9.4169	9.50184	#N/A	3
ORF72W.iORF3	10	2669	14617	7.50239	9.4142	9.49476	#N/A	3
ORF72W.iORF4	10	2547	13527	7.50239	9.3468	9.38312	#N/A	3
ORF72W_(U53)	13	3257	17326	7.87906	9.70106	9.73974	L	3
ORF73C_(U54)	23	3712	35345	8.69952	9.8895	10.7675	L	3
ORF74C_(U56)	11	2278	14030	7.63917	9.18603	9.43572	L	3
ORF75C	3	177	1461	0	5.52919	6.19004	#N/A	3
ORF76C.iORF1	16	2097	13468	8.17747	9.0668	9.37682	#N/A	3
ORF76C.iORF2	0	161	1026	0	5.3956	5.68847	#N/A	3
ORF76C_(U57)	37	5080	34993	9.3841	10.3417	10.753	L	3
ORF77W	2	713	4010	0	7.51566	7.63407	#N/A	3
ORF7C.iORF1	0	13	123	0	2.11046	2.82018	#N/A	3
ORF7C_(U9)	0	80	611	0	4.4209	4.95956	#N/A	3
ORF80W_(U64)	5	527	3103	0	7.08234	7.26625	E	3
ORF81W_(U65)	14	1579	14147	7.98554	8.65837	9.44768	L	3
ORF82C_(U66)	1	466	2022	0	6.90626	6.65338	L	3
ORF83C	0	9	107	0	1.72127	2.64936	#N/A	3
ORF83C.iORF1	0	7	83	0	1.47859	2.34794	#N/A	3
ORF84W	1	283	2051	0	6.19449	6.67372	#N/A	3
ORF84W.iORF1	0	131	1170	0	5.10593	5.8745	#N/A	3
ORF84W.iORF2	1	176	928	0	5.52119	5.54659	#N/A	3
ORF85W_(U68)	4	621	3388	0	7.31752	7.39224	#N/A	3
ORF87W.iORF1	12	2134	10999	7.7641	9.09199	9.08515	#N/A	3
ORF87W.iORF2	12	2111	10971	7.7641	9.07638	9.08148	#N/A	3
ORF87W.iORF3	12	2095	10901	7.7641	9.06543	9.07226	#N/A	3
ORF87W.iORF4	11	2015	10717	7.63917	9.00937	9.04775	#N/A	3
ORF87W.iORF5	10	1833	9256	7.50239	8.87307	8.83674	#N/A	3
ORF87W.iORF6	10	1757	9037	7.50239	8.81211	8.80227	#N/A	3
ORF87W.iORF7	9	1523	8413	7.35127	8.60641	8.69928	#N/A	3
ORF87W.iORF8	4	713	3564	0	7.51566	7.46488	#N/A	3
ORF88W_(U71)	6	684	4670	6.77072	7.45609	7.85287	E	3
ORF8W.iORF1	3	696	2909	0	7.48104	7.17374	#N/A	3
ORF8W.iORF2	3	566	2313	0	7.18461	6.84555	#N/A	3
ORF8W.iORF3	3	443	1769	0	6.83386	6.46257	#N/A	3
ORF91C	0	35	654	0	3.31235	5.05463	#N/A	3
ORF92C	0	6	50	0	1.34	1.79262	#N/A	3
ORF94C_(U75)	2	395	3726	0	6.66995	7.52865	#N/A	3
ORF96C.iORF1	1	123	1061	0	5.01775	5.73594	#N/A	3
ORF96C.iORF2	1	137	1307	0	5.16871	6.03167	#N/A	3
ORF96C.iORF3	6	1006	7722	6.77072	8.01002	8.57595	#N/A	3
ORF96C_(U76)	6	1021	7970	6.77072	8.03129	8.62144	L	3
ORF97C	5	651	3885	0	7.38517	7.58862	#N/A	3
ORF98C	8	956	6570	7.18245	7.93677	8.34353	#N/A	3
ORF9C	0	10	87	0	1.82885	2.40276	#N/A	3
rORF10	0	102	634	0	4.7568	5.01119	#N/A	3
rORF100	0	18	95	0	2.48402	2.50651	#N/A	3
rORF11	0	3	30	0	0.820288	1.30956	#N/A	3
rORF110	2	6	34	0	1.34	1.41998	#N/A	3
rORF12	2	81	1064	0	4.43799	5.73994	#N/A	3
rORF13	2	73	990	0	4.29524	5.63796	#N/A	3
rORF16	0	4	24	0	1.01508	1.12627	#N/A	3
rORF17	0	32	386	0	3.19662	4.32377	#N/A	3
rORF19	0	9	109	0	1.72127	2.67186	#N/A	3
rORF23	0	8	59	0	1.60503	1.96645	#N/A	3
rORF24	0	35	208	0	3.31235	3.49212	#N/A	3
rORF25	0	7	136	0	1.47859	2.94547	#N/A	3
rORF26	0	14	123	0	2.19331	2.82018	#N/A	3
rORF27	0	1	8	0	0.327978	0.479552	#N/A	3
rORF28	0	57	686	0	3.95879	5.12152	#N/A	3
rORF29	0	43	395	0	3.58206	4.35537	#N/A	3
rORF30	0	40	180	0	3.48673	3.30334	#N/A	3
rORF31	0	18	169	0	2.48402	3.22185	#N/A	3
rORF33	2	46	474	0	3.67148	4.60661	#N/A	3
rORF34	0	109	869	0	4.84913	5.45391	#N/A	3
rORF35	1	18	157	0	2.48402	3.12736	#N/A	3
rORF36	0	12	583	0	2.02256	4.89411	#N/A	3
rORF37	0	2	17	0	0.595032	0.878066	#N/A	3
rORF39	1	4	35	0	1.01508	1.44631	#N/A	3
rORF40	0	11	65	0	1.92895	2.07168	#N/A	3
rORF41	0	1	10	0	0.327978	0.578106	#N/A	3
rORF42	0	6	229	0	1.34	3.61908	#N/A	3
rORF43	1	25	341	0	2.88388	4.15441	#N/A	3
rORF44	0	21	275	0	2.6691	3.86339	#N/A	3
rORF46	0	1	11	0	0.327978	0.624968	#N/A	3
rORF5	0	7	39	0	1.47859	1.54709	#N/A	3
rORF50	0	72	714	0	4.27636	5.17761	#N/A	3
rORF51	0	6	79	0	1.34	2.29096	#N/A	3
rORF53	1	42	1216	0	3.55098	5.9292	#N/A	3
rORF54	1	149	1573	0	5.28661	6.2952	#N/A	3
rORF55	1	207	2311	0	5.75054	6.84432	#N/A	3
rORF56	3	40	1417	0	3.48673	6.14654	#N/A	3
rORF59	0	20	97	0	2.61	2.53132	#N/A	3
rORF6	0	6	30	0	1.34	1.30956	#N/A	3
rORF60	0	6	70	0	1.34	2.15388	#N/A	3
rORF61	1	26	158	0	2.93293	3.13547	#N/A	3
rORF62	0	7	132	0	1.47859	2.90807	#N/A	3
rORF65	0	17	94	0	2.41665	2.49394	#N/A	3
rORF66	0	183	1650	0	5.57626	6.36329	#N/A	3
rORF67	0	171	1568	0	5.48053	6.29066	#N/A	3
rORF68	0	148	788	0	5.27715	5.31613	#N/A	3
rORF69	0	0	0	0	0	0	#N/A	3
rORF7	0	2	15	0	0.595032	0.798534	#N/A	3
rORF70	0	70	540	0	4.23785	4.78743	#N/A	3
rORF71	1	115	775	0	4.92382	5.29274	#N/A	3
rORF72	0	73	405	0	4.29524	4.3897	#N/A	3
rORF73	0	68	325	0	4.19827	4.08906	#N/A	3
rORF74	1	44	238	0	3.61249	3.67024	#N/A	3
rORF75	1	86	559	0	4.52053	4.83554	#N/A	3
rORF76	0	23	223	0	2.78048	3.58393	#N/A	3
rORF8	0	6	91	0	1.34	2.45557	#N/A	3
rORF84	2	51	712	0	3.8092	5.17367	#N/A	3
rORF85	1	31	200	0	3.15589	3.44066	#N/A	3
rORF86	0	5	53	0	1.18667	1.85292	#N/A	3
rORF90	0	187	1423	0	5.60681	6.15255	#N/A	3
rORF92	0	21	116	0	2.6691	2.74792	#N/A	3
rORF94	0	44	953	0	3.61249	5.58413	#N/A	3
rORF97	1	17	183	0	2.41665	3.32479	#N/A	3
ORF103C	41	3497	62697	9.53198	9.80352	11.594	#N/A	4
ORF103C.iORF1	28	2632	46913	8.98269	9.39409	11.1757	#N/A	4
ORF103C.iORF2	38	3398	58523	9.42251	9.76213	11.4946	#N/A	4
ORF109C	29	1209	34445	9.03322	8.27427	10.7303	#N/A	4
ORF109C.iORF1	21	951	27759	8.5686	7.92923	10.4191	#N/A	4
ORF109C.iORF2	18	696	21014	8.34684	7.48104	10.0179	#N/A	4
ORF111C.iORF1	6	589	13235	6.77072	7.24169	9.35168	#N/A	4
ORF111C.iORF3	14	847	19921	7.98554	7.76287	9.94088	#N/A	4
ORF111C.iORF4	23	890	20571	8.69952	7.834	9.98715	#N/A	4
ORF111C.iORF5	29	1410	32974	9.03322	8.49548	10.6673	#N/A	4
ORF111C.iORF6	26	1155	26229	8.876	8.20856	10.3374	#N/A	4
ORF111C_(U100)	37	1668	39660	9.3841	8.73729	10.9335	L	4
ORF34C_(U32)	8	678	7447	7.18245	7.44345	8.52377	L	4
ORF60W_(U46)	9	650	10260	7.35127	7.38296	8.985	L	4
ORF61C_(U47)	9	474	13804	7.35127	6.93062	9.41232	L	4
ORF69C	0	0	4	0	0	0.25961	#N/A	4
ORF89C_(U72)	24	2057	30753	8.76077	9.03907	10.5668	L	4
rORF104	8	283	4158	7.18245	6.19449	7.6861	#N/A	4
rORF18	0	2	93	0	0.595032	2.48126	#N/A	4
rORF93	0	1	29	0	0.327978	1.28059	#N/A	4
