# Supplementary material for: Comprehensive annotations of human herpesvirus 6A and 6B genomes reveal novel and conserved genomic features
Source: eLife. 2020 Jan 16;9:e50960. doi: 10.7554/eLife.50960 (PMC6964970; doi:10.7554/eLife.50960)
Supplement: Supplementary file 6. — Bed format file of genomic loci of newly identified lncRNAs in the genome of HHV-6A. [file elife-50960-supp6.bed]

KC465951.1	68037	68269	lnc1	0	+	68037	68269	145,65,110	1	232	0
KC465951.1	28057	28557	lnc2	0	+	28057	28557	145,65,110	3	60,77,106	0,174,394
KC465951.1	117521	119466	lnc3.01	0	-	117521	119466	145,65,110	3	184,64,102	0,279,1843
KC465951.1	117800	119466	lnc3.02	0	-	117800	119466	145,65,110	2	64,102	0,1564
KC465951.1	117521	119675	lnc3.03	0	-	117521	119675	145,65,110	3	184,64,311	0,279,1843
KC465951.1	117800	119675	lnc3.04	0	-	117800	119675	145,65,110	2	64,311	0,1564
KC465951.1	117864	119364	lnc3_intron	0	-	117864	119364	145,65,110	2	1500	0
