# Supplementary material for: Comprehensive annotations of human herpesvirus 6A and 6B genomes reveal novel and conserved genomic features
Source: eLife. 2020 Jan 16;9:e50960. doi: 10.7554/eLife.50960 (PMC6964970; doi:10.7554/eLife.50960)
Supplement: Supplementary file 8. — GenBank files containing annotations of ORFs, lncRNAs and splice junctions as described in this paper for HHV-6A. [file elife-50960-supp8.gb]

LOCUS       KC465951  156885 bp                                         
DEFINITION  Human herpesvirus 6A strain GS, complete genome.
KEYWORDS    .
VERSION     KC465951.1
SOURCE      .
  ORGANISM  Human betaherpesvirus 6A
            Viruses; dsDNA viruses, no RNA stage; Herpesvirales; Herpesviridae;
            Betaherpesvirinae; Roseolovirus.
            .
FEATURES             Location/Qualifiers
     CDS             complement(8747..9847)
                     /gene="ORF1C_(U2)"
                     /product="ORF1C_(U2)"
     CDS             complement(8747..8863)
                     /gene="ORF1C.iORF1"
                     /product="ORF1C.iORF1"
     CDS             complement(8747..9274)
                     /gene="ORF1C.iORF2"
                     /product="ORF1C.iORF2"
     CDS             complement(10184..11305)
                     /gene="ORF2C_(U3)"
                     /product="ORF2C_(U3)"
     CDS             complement(10401..10643)
                     /gene="ORF2C.iORF1"
                     /product="ORF2C.iORF1"
     CDS             complement(10184..10648)
                     /gene="ORF2C.iORF2"
                     /product="ORF2C.iORF2"
     CDS             complement(10184..10666)
                     /gene="ORF2C.iORF3"
                     /product="ORF2C.iORF3"
     CDS             complement(10184..10717)
                     /gene="ORF2C.iORF4"
                     /product="ORF2C.iORF4"
     CDS             complement(11519..13126)
                     /gene="ORF3C_(U4)"
                     /product="ORF3C_(U4)"
     CDS             complement(join(13248..14892,14981..15956,16062..17124))
                     /gene="ORF4C_(U7)"
                     /product="ORF4C_(U7)"
     CDS             complement(13271..13369)
                     /gene="ORF4C.iORF1"
                     /product="ORF4C.iORF1"
     CDS             complement(13499..13594)
                     /gene="ORF4C.iORF2"
                     /product="ORF4C.iORF2"
     CDS             complement(14576..14701)
                     /gene="ORF4C.iORF3"
                     /product="ORF4C.iORF3"
     CDS             17328..17405
                     /gene="ORF5W"
                     /product="ORF5W"
     CDS             complement(17271..17585)
                     /gene="ORF6C"
                     /product="ORF6C"
     CDS             complement(17271..17351)
                     /gene="ORF6C.iORF1"
                     /product="ORF6C.iORF1"
     CDS             17637..18947
                     /gene="ORF7W_(U10)"
                     /product="ORF7W_(U10)"
     CDS             18105..18947
                     /gene="ORF7W.iORF1"
                     /product="ORF7W.iORF1"
     CDS             18666..18947
                     /gene="ORF7W.iORF2"
                     /product="ORF7W.iORF2"
     CDS             complement(18314..18385)
                     /gene="ORF8C"
                     /product="ORF8C"
     CDS             join(19869..19894,21697..21748,21826..22848)
                     /gene="ORF9W"
                     /product="ORF9W"
     CDS             join(19878..19894,21697..21748,21826..22848)
                     /gene="ORF9W.iORF1"
                     /product="ORF9W.iORF1"
     CDS             join(21716..21748,21826..22848)
                     /gene="ORF9W.iORF2"
                     /product="ORF9W.iORF2"
     CDS             join(19869..19894,21697..21748,22931..23254)
                     /gene="ORF10W"
                     /product="ORF10W"
     CDS             join(19878..19894,21697..21748,22931..23254)
                     /gene="ORF10W.iORF1"
                     /product="ORF10W.iORF1"
     CDS             join(21716..21748,22931..23254)
                     /gene="ORF10W.iORF2"
                     /product="ORF10W.iORF2"
     CDS             complement(18999..21614)
                     /gene="ORF11C_(U11)"
                     /product="ORF11C_(U11)"
     CDS             complement(18999..19112)
                     /gene="ORF11C.iORF1"
                     /product="ORF11C.iORF1"
     CDS             complement(23638..23778)
                     /gene="ORF12C"
                     /product="ORF12C"
     CDS             complement(join(25214..25399,25558..25630,25704..26020))
                     /gene="ORF13C_(U15)"
                     /product="ORF13C_(U15)"
     CDS             complement(join(26284..27059,27144..27372))
                     /gene="ORF14C_(U17)"
                     /product="ORF14C_(U17)"
     CDS             27850..28041
                     /gene="ORF15W"
                     /product="ORF15W"
     CDS             complement(28537..29418)
                     /gene="ORF16C_(U18)"
                     /product="ORF16C_(U18)"
     CDS             complement(28537..29403)
                     /gene="ORF16C.iORF1"
                     /product="ORF16C.iORF1"
     CDS             complement(join(29431..29473,29685..30850))
                     /gene="ORF17C"
                     /product="ORF17C"
     CDS             complement(join(29431..29473,29685..30829))
                     /gene="ORF17C.iORF1"
                     /product="ORF17C.iORF1"
     CDS             complement(31104..32372)
                     /gene="ORF18C_(U20)"
                     /product="ORF18C_(U20)"
     CDS             complement(32375..33676)
                     /gene="ORF19C_(U21)"
                     /product="ORF19C_(U21)"
     CDS             complement(33774..34382)
                     /gene="ORF20C_(U22)"
                     /product="ORF20C_(U22)"
     CDS             complement(34410..35120)
                     /gene="ORF21C_(U23)"
                     /product="ORF21C_(U23)"
     CDS             complement(34577..34723)
                     /gene="ORF21C.iORF1"
                     /product="ORF21C.iORF1"
     CDS             complement(34410..34871)
                     /gene="ORF21C.iORF2"
                     /product="ORF21C.iORF2"
     CDS             complement(34410..35072)
                     /gene="ORF21C.iORF3"
                     /product="ORF21C.iORF3"
     CDS             complement(35154..35264)
                     /gene="ORF22C"
                     /product="ORF22C"
     CDS             complement(35428..35691)
                     /gene="ORF23C_(U24)"
                     /product="ORF23C_(U24)"
     CDS             complement(35710..35883)
                     /gene="ORF24C_(U24A)"
                     /product="ORF24C_(U24A)"
     CDS             complement(35900..36850)
                     /gene="ORF25C_(U25)"
                     /product="ORF25C_(U25)"
     CDS             complement(36958..37845)
                     /gene="ORF26C_(U26)"
                     /product="ORF26C_(U26)"
     CDS             complement(36958..37632)
                     /gene="ORF26C.iORF1"
                     /product="ORF26C.iORF1"
     CDS             complement(37833..38939)
                     /gene="ORF27C"
                     /product="ORF27C"
     CDS             complement(37833..37964)
                     /gene="ORF27C.iORF1"
                     /product="ORF27C.iORF1"
     CDS             complement(39056..41470)
                     /gene="ORF28C_(U28)"
                     /product="ORF28C_(U28)"
     CDS             complement(39056..39622)
                     /gene="ORF28C.iORF1"
                     /product="ORF28C.iORF1"
     CDS             42361..45168
                     /gene="ORF29W"
                     /product="ORF29W"
     CDS             complement(41493..42392)
                     /gene="ORF30C_(U29)"
                     /product="ORF30C_(U29)"
     CDS             45186..51419
                     /gene="ORF31W_(U31)"
                     /product="ORF31W_(U31)"
     CDS             45217..45294
                     /gene="ORF31W.iORF1"
                     /product="ORF31W.iORF1"
     CDS             complement(51491..51757)
                     /gene="ORF32C_(U32)"
                     /product="ORF32C_(U32)"
     CDS             complement(51759..51929)
                     /gene="ORF33C"
                     /product="ORF33C"
     CDS             complement(51759..51914)
                     /gene="ORF33C.iORF1"
                     /product="ORF33C.iORF1"
     CDS             complement(53122..53952)
                     /gene="ORF34C_(U34)"
                     /product="ORF34C_(U34)"
     CDS             complement(53969..54286)
                     /gene="ORF35C"
                     /product="ORF35C"
     CDS             54288..55742
                     /gene="ORF36W_(U36)"
                     /product="ORF36W_(U36)"
     CDS             55617..55742
                     /gene="ORF36W.iORF1"
                     /product="ORF36W.iORF1"
     CDS             55650..55742
                     /gene="ORF36W.iORF2"
                     /product="ORF36W.iORF2"
     CDS             55682..55801
                     /gene="ORF37W"
                     /product="ORF37W"
     CDS             55746..56540
                     /gene="ORF38W_(U37)"
                     /product="ORF38W_(U37)"
     CDS             55884..56540
                     /gene="ORF38W.iORF1"
                     /product="ORF38W.iORF1"
     CDS             complement(56586..59624)
                     /gene="ORF39C_(U38)"
                     /product="ORF39C_(U38)"
     CDS             complement(56586..57665)
                     /gene="ORF39C.iORF1"
                     /product="ORF39C.iORF1"
     CDS             complement(56586..57689)
                     /gene="ORF39C.iORF2"
                     /product="ORF39C.iORF2"
     CDS             complement(59624..62116)
                     /gene="ORF40C_(U39)"
                     /product="ORF40C_(U39)"
     CDS             complement(59624..61708)
                     /gene="ORF40C.iORF1"
                     /product="ORF40C.iORF1"
     CDS             complement(62070..64250)
                     /gene="ORF41C_(U40)"
                     /product="ORF41C_(U40)"
     CDS             complement(62070..62252)
                     /gene="ORF41C.iORF1"
                     /product="ORF41C.iORF1"
     CDS             complement(64258..67656)
                     /gene="ORF42C_(U41)"
                     /product="ORF42C_(U41)"
     CDS             join(68046..68165,74972..75025)
                     /gene="ORF43W"
                     /product="ORF43W"
     CDS             join(68164..68165,74972..75031,93518..93647)
                     /gene="ORF44W"
                     /product="ORF44W"
     CDS             join(74982..75031,93518..93647)
                     /gene="ORF44W.iORF1"
                     /product="ORF44W.iORF1"
     CDS             join(68164..68165,74972..75031,75243..75246)
                     /gene="ORF45W"
                     /product="ORF45W"
     CDS             join(68164..68165,74972..75031,77861..77873)
                     /gene="ORF46W"
                     /product="ORF46W"
     CDS             complement(69067..70614)
                     /gene="ORF47C_(U42)"
                     /product="ORF47C_(U42)"
     CDS             complement(69067..69990)
                     /gene="ORF47C.iORF1"
                     /product="ORF47C.iORF1"
     CDS             70864..70968
                     /gene="ORF48W"
                     /product="ORF48W"
     CDS             71812..71958
                     /gene="ORF49W"
                     /product="ORF49W"
     CDS             join(73120..73198,73901..74089,74972..75006)
                     /gene="ORF50W"
                     /product="ORF50W"
     CDS             complement(70839..73421)
                     /gene="ORF51C_(U43)"
                     /product="ORF51C_(U43)"
     CDS             join(73462..74089,74972..75006)
                     /gene="ORF52W"
                     /product="ORF52W"
     CDS             join(73693..74089,74972..75006)
                     /gene="ORF52W.iORF1"
                     /product="ORF52W.iORF1"
     CDS             74753..74821
                     /gene="ORF53W"
                     /product="ORF53W"
     CDS             74941..75006
                     /gene="ORF54W"
                     /product="ORF54W"
     CDS             complement(74104..75234)
                     /gene="ORF55C_(U45)"
                     /product="ORF55C_(U45)"
     CDS             75307..75561
                     /gene="ORF56W_(U46)"
                     /product="ORF56W_(U46)"
     CDS             complement(75931..77787)
                     /gene="ORF57C"
                     /product="ORF57C"
     CDS             77870..78034
                     /gene="ORF58W_(U47A)"
                     /product="ORF58W_(U47A)"
     CDS             80057..80191
                     /gene="ORF59W"
                     /product="ORF59W"
     CDS             complement(78053..80137)
                     /gene="ORF60C_(U48)"
                     /product="ORF60C_(U48)"
     CDS             complement(80052..80150)
                     /gene="ORF61C"
                     /product="ORF61C"
     CDS             80296..81054
                     /gene="ORF62W_(U49)"
                     /product="ORF62W_(U49)"
     CDS             80831..82498
                     /gene="ORF63W_(U50)"
                     /product="ORF63W_(U50)"
     CDS             82292..82498
                     /gene="ORF63W.iORF1"
                     /product="ORF63W.iORF1"
     CDS             82567..82695
                     /gene="ORF64W"
                     /product="ORF64W"
     CDS             82593..83498
                     /gene="ORF65W_(U51)"
                     /product="ORF65W_(U51)"
     CDS             complement(82553..82630)
                     /gene="ORF66C"
                     /product="ORF66C"
     CDS             complement(83517..84293)
                     /gene="ORF67C_(U52)"
                     /product="ORF67C_(U52)"
     CDS             84300..85886
                     /gene="ORF68W_(U53)"
                     /product="ORF68W_(U53)"
     CDS             85056..85886
                     /gene="ORF68W.iORF1"
                     /product="ORF68W.iORF1"
     CDS             85086..85886
                     /gene="ORF68W.iORF2"
                     /product="ORF68W.iORF2"
     CDS             85090..85155
                     /gene="ORF68W.iORF3"
                     /product="ORF68W.iORF3"
     CDS             85152..85886
                     /gene="ORF68W.iORF4_(U53.5)"
                     /product="ORF68W.iORF4_(U53.5)"
     CDS             complement(86070..87446)
                     /gene="ORF69C_(U54)"
                     /product="ORF69C_(U54)"
     CDS             complement(87524..88822)
                     /gene="ORF70C_(U55)"
                     /product="ORF70C_(U55)"
     CDS             complement(89002..89892)
                     /gene="ORF71C_(U56)"
                     /product="ORF71C_(U56)"
     CDS             complement(89894..93931)
                     /gene="ORF72C_(U57)"
                     /product="ORF72C_(U57)"
     CDS             complement(89894..90082)
                     /gene="ORF72C.iORF1"
                     /product="ORF72C.iORF1"
     CDS             complement(89894..90142)
                     /gene="ORF72C.iORF2"
                     /product="ORF72C.iORF2"
     CDS             complement(90283..90357)
                     /gene="ORF72C.iORF3"
                     /product="ORF72C.iORF3"
     CDS             complement(91137..91250)
                     /gene="ORF72C.iORF4"
                     /product="ORF72C.iORF4"
     CDS             96258..97310
                     /gene="ORF74W_(U59)"
                     /product="ORF74W_(U59)"
     CDS             98446..98703
                     /gene="ORF75W_(U62)"
                     /product="ORF75W_(U62)"
     CDS             98651..99301
                     /gene="ORF76W_(U63)"
                     /product="ORF76W_(U63)"
     CDS             99149..99301
                     /gene="ORF76W.iORF1"
                     /product="ORF76W.iORF1"
     CDS             99152..99301
                     /gene="ORF76W.iORF2"
                     /product="ORF76W.iORF2"
     CDS             100564..101571
                     /gene="ORF77W_(U65)"
                     /product="ORF77W_(U65)"
     CDS             102507..103541
                     /gene="ORF78W"
                     /product="ORF78W"
     CDS             102525..103541
                     /gene="ORF78W.iORF1"
                     /product="ORF78W.iORF1"
     CDS             103406..103480
                     /gene="ORF78W.iORF2"
                     /product="ORF78W.iORF2"
     CDS             103440..103541
                     /gene="ORF78W.iORF3"
                     /product="ORF78W.iORF3"
     CDS             103464..103541
                     /gene="ORF78W.iORF4"
                     /product="ORF78W.iORF4"
     CDS             complement(join(97307..98434,101636..102508))
                     /gene="ORF79C_(U60)"
                     /product="ORF79C_(U60)"
     CDS             complement(102539..102646)
                     /gene="ORF80C"
                     /product="ORF80C"
     CDS             complement(102556..102624)
                     /gene="ORF80C.iORF1"
                     /product="ORF80C.iORF1"
     CDS             103399..103578
                     /gene="ORF81W"
                     /product="ORF81W"
     CDS             103477..103578
                     /gene="ORF81W.iORF1"
                     /product="ORF81W.iORF1"
     CDS             103541..103885
                     /gene="ORF82W_(U68)"
                     /product="ORF82W_(U68)"
     CDS             103888..105576
                     /gene="ORF83W_(U69)"
                     /product="ORF83W_(U69)"
     CDS             104056..105576
                     /gene="ORF83W.iORF1"
                     /product="ORF83W.iORF1"
     CDS             105584..107050
                     /gene="ORF84W_(U70)"
                     /product="ORF84W_(U70)"
     CDS             106409..107050
                     /gene="ORF84W.iORF1"
                     /product="ORF84W.iORF1"
     CDS             106464..106553
                     /gene="ORF84W.iORF2"
                     /product="ORF84W.iORF2"
     CDS             106520..107050
                     /gene="ORF84W.iORF3"
                     /product="ORF84W.iORF3"
     CDS             106541..107050
                     /gene="ORF84W.iORF4"
                     /product="ORF84W.iORF4"
     CDS             106601..107050
                     /gene="ORF84W.iORF5"
                     /product="ORF84W.iORF5"
     CDS             106709..107050
                     /gene="ORF84W.iORF6"
                     /product="ORF84W.iORF6"
     CDS             106787..107050
                     /gene="ORF84W.iORF7"
                     /product="ORF84W.iORF7"
     CDS             106987..107220
                     /gene="ORF85W_(U71)"
                     /product="ORF85W_(U71)"
     CDS             complement(107300..108334)
                     /gene="ORF86C_(U72)"
                     /product="ORF86C_(U72)"
     CDS             108347..110689
                     /gene="ORF87W_(U73)"
                     /product="ORF87W_(U73)"
     CDS             109730..110689
                     /gene="ORF87W.iORF1"
                     /product="ORF87W.iORF1"
     CDS             complement(108380..108445)
                     /gene="ORF88C"
                     /product="ORF88C"
     CDS             complement(108535..108609)
                     /gene="ORF89C"
                     /product="ORF89C"
     CDS             110658..112646
                     /gene="ORF90W_(U74)"
                     /product="ORF90W_(U74)"
     CDS             complement(112681..113430)
                     /gene="ORF91C_(U75)"
                     /product="ORF91C_(U75)"
     CDS             115122..117596
                     /gene="ORF92W_(U77)"
                     /product="ORF92W_(U77)"
     CDS             complement(113339..115279)
                     /gene="ORF93C_(U76)"
                     /product="ORF93C_(U76)"
     CDS             complement(113339..113509)
                     /gene="ORF93C.iORF1"
                     /product="ORF93C.iORF1"
     CDS             complement(116719..116883)
                     /gene="ORF94C"
                     /product="ORF94C"
     CDS             complement(118341..118439)
                     /gene="ORF95C"
                     /product="ORF95C"
     CDS             complement(join(117838..117864,119365..119409))
                     /gene="ORF96C"
                     /product="ORF96C"
     CDS             complement(119527..119595)
                     /gene="ORF97C"
                     /product="ORF97C"
     CDS             join(120196..120826,120923..121119,121202..121765)
                     /gene="ORF98W_(U79)"
                     /product="ORF98W_(U79)"
     CDS             join(120196..120826,120923..121039,121468..121646)
                     /gene="ORF98W.iORF1"
                     /product="ORF98W.iORF1"
     CDS             join(120196..120826,120923..121039,121202..121230)
                     /gene="ORF98W.iORF2"
                     /product="ORF98W.iORF2"
     CDS             complement(121809..122576)
                     /gene="ORF99C_(U81)"
                     /product="ORF99C_(U81)"
     CDS             complement(122652..123404)
                     /gene="ORF100C_(U82)"
                     /product="ORF100C_(U82)"
     CDS             complement(join(123509..123648,123726..123837))
                     /gene="ORF101C"
                     /product="ORF101C"
     CDS             complement(123927..124955)
                     /gene="ORF102C_(U84)"
                     /product="ORF102C_(U84)"
     CDS             complement(123927..124337)
                     /gene="ORF102C.iORF1"
                     /product="ORF102C.iORF1"
     CDS             complement(124435..124524)
                     /gene="ORF102C.iORF2"
                     /product="ORF102C.iORF2"
     CDS             complement(124983..125855)
                     /gene="ORF103C_(U85)"
                     /product="ORF103C_(U85)"
     CDS             complement(125936..126115)
                     /gene="ORF104C"
                     /product="ORF104C"
     CDS             complement(join(125985..130096,135481..135674,
                     135763..135821))
                     /gene="ORF105C_(U86)"
                     /product="ORF105C_(U86)"
     CDS             complement(join(132801..135373,135481..135674,
                     135763..135821))
                     /gene="ORF106C_(U90)"
                     /product="ORF106C_(U90)"
     CDS             join(135976..136186,136289..136539)
                     /gene="ORF107W_(U91)"
                     /product="ORF107W_(U91)"
     CDS             complement(join(135852..135859,136649..136718))
                     /gene="ORF108C"
                     /product="ORF108C"
     CDS             140447..143815
                     /gene="ORF109W_(U95)"
                     /product="ORF109W_(U95)"
     CDS             complement(join(140671..140704,143050..143149,
                     144188..144492,144602..144730,144880..145052))
                     /gene="ORF110C"
                     /product="ORF110C"
     CDS             complement(join(140671..140704,143050..143149,
                     144188..144492,144880..145001))
                     /gene="ORF110C.iORF1"
                     /product="ORF110C.iORF1"
     CDS             complement(join(140671..140704,143050..143149,
                     144188..144492,144602..144730,144880..145001))
                     /gene="ORF110C.iORF2"
                     /product="ORF110C.iORF2"
     CDS             complement(join(140671..140704,143050..143149,
                     144188..144492,144880..145052))
                     /gene="ORF110C.iORF3"
                     /product="ORF110C.iORF3"
     CDS             complement(146617..146715)
                     /gene="ORF111C"
                     /product="ORF111C"
     CDS             complement(join(144150..144492,144602..144730,
                     144880..144889,145404..145564,145647..145760,
                     145852..145959,146055..146132,146289..146624,
                     147023..147304,147401..147810))
                     /gene="ORF112C_(U100)"
                     /product="ORF112C_(U100)"
     CDS             complement(join(145695..145752,145852..145959,
                     146055..146132,146289..146624,147023..147190,
                     147401..147810))
                     /gene="ORF112C.iORF1"
                     /product="ORF112C.iORF1"
     CDS             complement(join(145695..145752,145852..145959,
                     146055..146132,146289..146624,147023..147193,
                     147401..147810))
                     /gene="ORF112C.iORF2"
                     /product="ORF112C.iORF2"
     CDS             complement(join(145695..145752,145852..145959,
                     146055..146132,146289..146624,147023..147304,
                     147401..147810))
                     /gene="ORF112C.iORF3"
                     /product="ORF112C.iORF3"
     CDS             complement(join(145318..145564,145647..145760,
                     145852..145959,146055..146132,146289..146624,
                     147023..147304,147401..147966))
                     /gene="ORF113C"
                     /product="ORF113C"
     CDS             complement(join(145318..145564,145647..145760,
                     145852..145959,146055..146132,146289..146624,
                     147023..147190,147401..147810))
                     /gene="ORF113C.iORF1"
                     /product="ORF113C.iORF1"
     CDS             complement(join(145318..145564,145647..145760,
                     145852..145959,146055..146132,146289..146624,
                     147023..147193,147401..147810))
                     /gene="ORF113C.iORF2"
                     /product="ORF113C.iORF2"
     CDS             complement(join(145318..145564,145647..145760,
                     145852..145959,146055..146132,146289..146624,
                     147023..147304,147401..147810))
                     /gene="ORF113C.iORF3"
                     /product="ORF113C.iORF3"
     CDS             complement(join(145695..145752,145852..145959,
                     146055..146132,146289..146624,147023..147190,
                     147401..147966))
                     /gene="ORF113C.iORF4"
                     /product="ORF113C.iORF4"
     CDS             complement(join(145318..145564,145647..145760,
                     145852..145959,146055..146132,146289..146624,
                     147023..147190,147401..147966))
                     /gene="ORF113C.iORF5"
                     /product="ORF113C.iORF5"
     CDS             complement(join(145695..145752,145852..145959,
                     146055..146132,146289..146624,147023..147193,
                     147401..147966))
                     /gene="ORF113C.iORF6"
                     /product="ORF113C.iORF6"
     CDS             complement(join(145318..145564,145647..145760,
                     145852..145959,146055..146132,146289..146624,
                     147023..147193,147401..147966))
                     /gene="ORF113C.iORF7"
                     /product="ORF113C.iORF7"
     CDS             complement(join(145695..145752,145852..145959,
                     146055..146132,146289..146624,147023..147304,
                     147401..147966))
                     /gene="ORF113C.iORF8"
                     /product="ORF113C.iORF8"
     CDS             complement(join(145318..145564,145647..145760,
                     145852..145959,146055..146132,146289..146624,
                     147023..147304,147401..147824,148143..148191,
                     149610..149612))
                     /gene="ORF114C"
                     /product="ORF114C"
     CDS             complement(join(145695..145752,145852..145959,
                     146055..146132,146289..146624,147023..147190,
                     147401..147824,148143..148191))
                     /gene="ORF114C.iORF1"
                     /product="ORF114C.iORF1"
     CDS             complement(join(145318..145564,145647..145760,
                     145852..145959,146055..146132,146289..146624,
                     147023..147193,147401..147824,148143..148191,
                     149610..149612))
                     /gene="ORF114C.iORF10"
                     /product="ORF114C.iORF10"
     CDS             complement(join(145695..145752,145852..145959,
                     146055..146132,146289..146624,147023..147304,
                     147401..147824,148143..148191,149610..149612))
                     /gene="ORF114C.iORF11"
                     /product="ORF114C.iORF11"
     CDS             complement(join(145318..145564,145647..145760,
                     145852..145959,146055..146132,146289..146624,
                     147023..147190,147401..147824,148143..148191))
                     /gene="ORF114C.iORF2"
                     /product="ORF114C.iORF2"
     CDS             complement(join(145695..145752,145852..145959,
                     146055..146132,146289..146624,147023..147193,
                     147401..147824,148143..148191))
                     /gene="ORF114C.iORF3"
                     /product="ORF114C.iORF3"
     CDS             complement(join(145318..145564,145647..145760,
                     145852..145959,146055..146132,146289..146624,
                     147023..147193,147401..147824,148143..148191))
                     /gene="ORF114C.iORF4"
                     /product="ORF114C.iORF4"
     CDS             complement(join(145695..145752,145852..145959,
                     146055..146132,146289..146624,147023..147304,
                     147401..147824,148143..148191))
                     /gene="ORF114C.iORF5"
                     /product="ORF114C.iORF5"
     CDS             complement(join(145318..145564,145647..145760,
                     145852..145959,146055..146132,146289..146624,
                     147023..147304,147401..147824,148143..148191))
                     /gene="ORF114C.iORF6"
                     /product="ORF114C.iORF6"
     CDS             complement(join(145695..145752,145852..145959,
                     146055..146132,146289..146624,147023..147190,
                     147401..147824,148143..148191,149610..149612))
                     /gene="ORF114C.iORF7"
                     /product="ORF114C.iORF7"
     CDS             complement(join(145318..145564,145647..145760,
                     145852..145959,146055..146132,146289..146624,
                     147023..147190,147401..147824,148143..148191,
                     149610..149612))
                     /gene="ORF114C.iORF8"
                     /product="ORF114C.iORF8"
     CDS             complement(join(145695..145752,145852..145959,
                     146055..146132,146289..146624,147023..147193,
                     147401..147824,148143..148191,149610..149612))
                     /gene="ORF114C.iORF9"
                     /product="ORF114C.iORF9"
     CDS             complement(10161..10187)
                     /gene="rORF1"
                     /product="rORF1"
     CDS             complement(11530..11535)
                     /gene="rORF2"
                     /product="rORF2"
     CDS             complement(11478..11537)
                     /gene="rORF3"
                     /product="rORF3"
     CDS             complement(13226..13270)
                     /gene="rORF4"
                     /product="rORF4"
     CDS             complement(13271..13321)
                     /gene="rORF5"
                     /product="rORF5"
     CDS             complement(13382..13417)
                     /gene="rORF6"
                     /product="rORF6"
     CDS             17289..17300
                     /gene="rORF7"
                     /product="rORF7"
     CDS             17517..17570
                     /gene="rORF8"
                     /product="rORF8"
     CDS             17558..17578
                     /gene="rORF9"
                     /product="rORF9"
     CDS             17584..17646
                     /gene="rORF10"
                     /product="rORF10"
     CDS             18614..18625
                     /gene="rORF11"
                     /product="rORF11"
     CDS             18718..18753
                     /gene="rORF12"
                     /product="rORF12"
     CDS             18743..18790
                     /gene="rORF13"
                     /product="rORF13"
     CDS             complement(19157..19183)
                     /gene="rORF14"
                     /product="rORF14"
     CDS             complement(19310..19372)
                     /gene="rORF15"
                     /product="rORF15"
     CDS             19462..19500
                     /gene="rORF16"
                     /product="rORF16"
     CDS             19510..19557
                     /gene="rORF17"
                     /product="rORF17"
     CDS             19646..19687
                     /gene="rORF18"
                     /product="rORF18"
     CDS             complement(19667..19717)
                     /gene="rORF19"
                     /product="rORF19"
     CDS             complement(20077..20100)
                     /gene="rORF20"
                     /product="rORF20"
     CDS             23370..23408
                     /gene="rORF21"
                     /product="rORF21"
     CDS             23469..23528
                     /gene="rORF22"
                     /product="rORF22"
     CDS             complement(26049..26060)
                     /gene="rORF23"
                     /product="rORF23"
     CDS             complement(26120..26131)
                     /gene="rORF24"
                     /product="rORF24"
     CDS             join(28095..28117,28232..28232)
                     /gene="rORF25"
                     /product="rORF25"
     CDS             join(28101..28117,28232..28232)
                     /gene="rORF26"
                     /product="rORF26"
     CDS             28259..28303
                     /gene="rORF27"
                     /product="rORF27"
     CDS             28265..28303
                     /gene="rORF28"
                     /product="rORF28"
     CDS             28452..28457
                     /gene="rORF29"
                     /product="rORF29"
     CDS             complement(30262..30279)
                     /gene="rORF30"
                     /product="rORF30"
     CDS             complement(30867..30890)
                     /gene="rORF31"
                     /product="rORF31"
     CDS             complement(33736..33783)
                     /gene="rORF32"
                     /product="rORF32"
     CDS             complement(35154..35168)
                     /gene="rORF33"
                     /product="rORF33"
     CDS             complement(35209..35226)
                     /gene="rORF34"
                     /product="rORF34"
     CDS             complement(35242..35274)
                     /gene="rORF35"
                     /product="rORF35"
     CDS             complement(35242..35289)
                     /gene="rORF36"
                     /product="rORF36"
     CDS             36071..36115
                     /gene="rORF37"
                     /product="rORF37"
     CDS             complement(37833..37889)
                     /gene="rORF38"
                     /product="rORF38"
     CDS             complement(38401..38421)
                     /gene="rORF39"
                     /product="rORF39"
     CDS             complement(39298..39306)
                     /gene="rORF40"
                     /product="rORF40"
     CDS             complement(39307..39327)
                     /gene="rORF41"
                     /product="rORF41"
     CDS             complement(39679..39720)
                     /gene="rORF42"
                     /product="rORF42"
     CDS             complement(41750..41764)
                     /gene="rORF43"
                     /product="rORF43"
     CDS             complement(42404..42430)
                     /gene="rORF44"
                     /product="rORF44"
     CDS             complement(42534..42548)
                     /gene="rORF45"
                     /product="rORF45"
     CDS             complement(42581..42595)
                     /gene="rORF46"
                     /product="rORF46"
     CDS             complement(42705..42734)
                     /gene="rORF47"
                     /product="rORF47"
     CDS             complement(42962..42997)
                     /gene="rORF48"
                     /product="rORF48"
     CDS             complement(44157..44186)
                     /gene="rORF49"
                     /product="rORF49"
     CDS             44837..44848
                     /gene="rORF50"
                     /product="rORF50"
     CDS             45102..45128
                     /gene="rORF51"
                     /product="rORF51"
     CDS             complement(51754..51768)
                     /gene="rORF52"
                     /product="rORF52"
     CDS             complement(51838..51855)
                     /gene="rORF53"
                     /product="rORF53"
     CDS             complement(51824..51871)
                     /gene="rORF54"
                     /product="rORF54"
     CDS             complement(51871..51894)
                     /gene="rORF55"
                     /product="rORF55"
     CDS             53224..53265
                     /gene="rORF56"
                     /product="rORF56"
     CDS             54031..54042
                     /gene="rORF57"
                     /product="rORF57"
     CDS             54063..54098
                     /gene="rORF58"
                     /product="rORF58"
     CDS             complement(54371..54421)
                     /gene="rORF59"
                     /product="rORF59"
     CDS             55633..55686
                     /gene="rORF60"
                     /product="rORF60"
     CDS             55702..55749
                     /gene="rORF61"
                     /product="rORF61"
     CDS             complement(59677..59697)
                     /gene="rORF62"
                     /product="rORF62"
     CDS             complement(59923..59931)
                     /gene="rORF63"
                     /product="rORF63"
     CDS             60638..60655
                     /gene="rORF64"
                     /product="rORF64"
     CDS             63444..63461
                     /gene="rORF65"
                     /product="rORF65"
     CDS             65469..65477
                     /gene="rORF66"
                     /product="rORF66"
     CDS             65704..65712
                     /gene="rORF67"
                     /product="rORF67"
     CDS             67688..67726
                     /gene="rORF68"
                     /product="rORF68"
     CDS             68201..68227
                     /gene="rORF69"
                     /product="rORF69"
     CDS             69767..69784
                     /gene="rORF70"
                     /product="rORF70"
     CDS             complement(70305..70367)
                     /gene="rORF71"
                     /product="rORF71"
     CDS             complement(70446..70460)
                     /gene="rORF72"
                     /product="rORF72"
     CDS             73414..73428
                     /gene="rORF73"
                     /product="rORF73"
     CDS             73541..73570
                     /gene="rORF74"
                     /product="rORF74"
     CDS             74652..74675
                     /gene="rORF75"
                     /product="rORF75"
     CDS             74821..74832
                     /gene="rORF76"
                     /product="rORF76"
     CDS             join(74982..75031,75243..75246)
                     /gene="rORF77"
                     /product="rORF77"
     CDS             join(74982..75031,77861..77873)
                     /gene="rORF78"
                     /product="rORF78"
     CDS             75254..75292
                     /gene="rORF79"
                     /product="rORF79"
     CDS             complement(75759..75797)
                     /gene="rORF80"
                     /product="rORF80"
     CDS             77178..77222
                     /gene="rORF81"
                     /product="rORF81"
     CDS             complement(78256..78264)
                     /gene="rORF82"
                     /product="rORF82"
     CDS             complement(80008..80049)
                     /gene="rORF83"
                     /product="rORF83"
     CDS             82038..82097
                     /gene="rORF84"
                     /product="rORF84"
     CDS             82505..82516
                     /gene="rORF85"
                     /product="rORF85"
     CDS             82531..82548
                     /gene="rORF86"
                     /product="rORF86"
     CDS             complement(82564..82575)
                     /gene="rORF87"
                     /product="rORF87"
     CDS             84487..84540
                     /gene="rORF88"
                     /product="rORF88"
     CDS             85036..85053
                     /gene="rORF89"
                     /product="rORF89"
     CDS             85252..85281
                     /gene="rORF90"
                     /product="rORF90"
     CDS             complement(85641..85697)
                     /gene="rORF91"
                     /product="rORF91"
     CDS             87238..87249
                     /gene="rORF92"
                     /product="rORF92"
     CDS             complement(88765..88800)
                     /gene="rORF93"
                     /product="rORF93"
     CDS             complement(89894..89941)
                     /gene="rORF94"
                     /product="rORF94"
     CDS             complement(89938..89949)
                     /gene="rORF95"
                     /product="rORF95"
     CDS             complement(90087..90101)
                     /gene="rORF96"
                     /product="rORF96"
     CDS             complement(90192..90245)
                     /gene="rORF97"
                     /product="rORF97"
     CDS             complement(90619..90642)
                     /gene="rORF98"
                     /product="rORF98"
     CDS             complement(91063..91119)
                     /gene="rORF99"
                     /product="rORF99"
     CDS             complement(91528..91542)
                     /gene="rORF100"
                     /product="rORF100"
     CDS             complement(91666..91692)
                     /gene="rORF101"
                     /product="rORF101"
     CDS             93714..93764
                     /gene="rORF102"
                     /product="rORF102"
     CDS             complement(94175..94222)
                     /gene="rORF103"
                     /product="rORF103"
     CDS             96215..96241
                     /gene="rORF104"
                     /product="rORF104"
     CDS             99207..99221
                     /gene="rORF105"
                     /product="rORF105"
     CDS             100397..100417
                     /gene="rORF106"
                     /product="rORF106"
     CDS             complement(102556..102609)
                     /gene="rORF107"
                     /product="rORF107"
     CDS             105541..105576
                     /gene="rORF108"
                     /product="rORF108"
     CDS             106650..106661
                     /gene="rORF109"
                     /product="rORF109"
     CDS             106884..106889
                     /gene="rORF110"
                     /product="rORF110"
     CDS             106939..106959
                     /gene="rORF111"
                     /product="rORF111"
     CDS             complement(108380..108397)
                     /gene="rORF112"
                     /product="rORF112"
     CDS             complement(108380..108409)
                     /gene="rORF113"
                     /product="rORF113"
     CDS             complement(108380..108427)
                     /gene="rORF114"
                     /product="rORF114"
     CDS             complement(108442..108474)
                     /gene="rORF115"
                     /product="rORF115"
     CDS             complement(108512..108538)
                     /gene="rORF116"
                     /product="rORF116"
     CDS             109650..109682
                     /gene="rORF117"
                     /product="rORF117"
     CDS             109929..109955
                     /gene="rORF118"
                     /product="rORF118"
     CDS             complement(115453..115467)
                     /gene="rORF119"
                     /product="rORF119"
     CDS             complement(117521..117583)
                     /gene="rORF120"
                     /product="rORF120"
     CDS             complement(117656..117667)
                     /gene="rORF121"
                     /product="rORF121"
     CDS             complement(join(117682..117705,117801..117806))
                     /gene="rORF122"
                     /product="rORF122"
     CDS             complement(117803..117820)
                     /gene="rORF123"
                     /product="rORF123"
     CDS             complement(118488..118505)
                     /gene="rORF124"
                     /product="rORF124"
     CDS             complement(119469..119480)
                     /gene="rORF125"
                     /product="rORF125"
     CDS             complement(119534..119551)
                     /gene="rORF126"
                     /product="rORF126"
     CDS             120085..120123
                     /gene="rORF127"
                     /product="rORF127"
     CDS             complement(122060..122104)
                     /gene="rORF128"
                     /product="rORF128"
     CDS             complement(123606..123650)
                     /gene="rORF129"
                     /product="rORF129"
     CDS             complement(123859..123897)
                     /gene="rORF130"
                     /product="rORF130"
     CDS             complement(125048..125083)
                     /gene="rORF131"
                     /product="rORF131"
     CDS             125198..125242
                     /gene="rORF132"
                     /product="rORF132"
     CDS             complement(125252..125281)
                     /gene="rORF133"
                     /product="rORF133"
     CDS             135319..135372
                     /gene="rORF134"
                     /product="rORF134"
     CDS             135604..135618
                     /gene="rORF135"
                     /product="rORF135"
     CDS             complement(136652..136666)
                     /gene="rORF136"
                     /product="rORF136"
     CDS             complement(136938..136997)
                     /gene="rORF137"
                     /product="rORF137"
     CDS             138759..138770
                     /gene="rORF138"
                     /product="rORF138"
     CDS             143076..143087
                     /gene="rORF139"
                     /product="rORF139"
     CDS             complement(145318..145353)
                     /gene="rORF140"
                     /product="rORF140"
     CDS             complement(join(147819..147824,148066..148083))
                     /gene="rORF141"
                     /product="rORF141"
     ncRNA           68038..68269
                     /gene="lnc1"
                     /product="lnc1"
     ncRNA           join(28058..28117,28232..28308,28452..28557)
                     /gene="lnc2"
                     /product="lnc2"
     ncRNA           complement(join(117522..117705,117801..117864,
                     119365..119466))
                     /gene="lnc3.01"
                     /product="lnc3.01"
     ncRNA           complement(join(117801..117864,119365..119466))
                     /gene="lnc3.02"
                     /product="lnc3.02"
     ncRNA           complement(join(117522..117705,117801..117864,
                     119365..119675))
                     /gene="lnc3.03"
                     /product="lnc3.03"
     ncRNA           complement(join(117801..117864,119365..119675))
                     /gene="lnc3.04"
                     /product="lnc3.04"
     ncRNA           complement(117865..119364)
                     /gene="lnc3_intron"
                     /product="lnc3_intron"
     splice_junction complement(98433..98434,101636..101637)
                     /source="ncbi"
                     /gene="SJ_1"
                     /product="SJ_1"
     splice_junction complement(130095..130096,135481..135482)
                     /source="ncbi"
                     /gene="SJ_2"
                     /product="SJ_2"
     splice_junction 75030..75031,93518..93519
                     /source="new"
                     /gene="SJ_3"
                     /product="SJ_3"
     splice_junction 102221..102222,102498..102499
                     /source="new"
                     /gene="SJ_4"
                     /product="SJ_4"
     splice_junction complement(135858..135859,136649..136650)
                     /source="new"
                     /gene="SJ_5"
                     /product="SJ_5"
     splice_junction complement(135673..135674,135763..135764)
                     /source="ncbi"
                     /gene="SJ_6"
                     /product="SJ_6"
     splice_junction 121038..121039,121468..121469
                     /source="new"
                     /gene="SJ_7"
                     /product="SJ_7"
     splice_junction complement(17625..17626,18287..18288)
                     /source="new"
                     /gene="SJ_8"
                     /product="SJ_8"
     splice_junction 21747..21748,21826..21827
                     /source="new"
                     /gene="SJ_9"
                     /product="SJ_9"
     splice_junction complement(14891..14892,14981..14982)
                     /source="ncbi"
                     /gene="SJ_10"
                     /product="SJ_10"
     splice_junction 70181..70182,74972..74973
                     /source="new"
                     /gene="SJ_11"
                     /product="SJ_11"
     splice_junction 73197..73198,73901..73902
                     /source="new"
                     /gene="SJ_12"
                     /product="SJ_12"
     splice_junction 121118..121119,121468..121469
                     /source="new"
                     /gene="SJ_13"
                     /product="SJ_13"
     splice_junction 121118..121119,121202..121203
                     /source="ncbi"
                     /gene="SJ_14"
                     /product="SJ_14"
     splice_junction complement(27058..27059,27144..27145)
                     /source="ncbi"
                     /gene="SJ_15"
                     /product="SJ_15"
     splice_junction 21747..21748,22931..22932
                     /source="new"
                     /gene="SJ_16"
                     /product="SJ_16"
     splice_junction 121038..121039,121202..121203
                     /source="new"
                     /gene="SJ_17"
                     /product="SJ_17"
     splice_junction 75733..75734,77861..77862
                     /source="new"
                     /gene="SJ_18"
                     /product="SJ_18"
     splice_junction 136185..136186,136289..136290
                     /source="ncbi"
                     /gene="SJ_19"
                     /product="SJ_19"
     splice_junction complement(15955..15956,16062..16063)
                     /source="ncbi"
                     /gene="SJ_20"
                     /product="SJ_20"
     splice_junction complement(25629..25630,25704..25705)
                     /source="ncbi"
                     /gene="SJ_21"
                     /product="SJ_21"
     splice_junction complement(144491..144492,144880..144881)
                     /source="new"
                     /gene="SJ_22"
                     /product="SJ_22"
     splice_junction 138804..138805,140447..140448
                     /source="new"
                     /gene="SJ_23"
                     /product="SJ_23"
     splice_junction complement(147823..147824,148143..148144)
                     /source="new"
                     /gene="SJ_24"
                     /product="SJ_24"
     splice_junction complement(140703..140704,143050..143051)
                     /source="new"
                     /gene="SJ_25"
                     /product="SJ_25"
     splice_junction complement(29472..29473,29685..29686)
                     /source="new"
                     /gene="SJ_26"
                     /product="SJ_26"
     splice_junction 19893..19894,21697..21698
                     /source="new"
                     /gene="SJ_27"
                     /product="SJ_27"
     splice_junction complement(145751..145752,145852..145853)
                     /source="new"
                     /gene="SJ_28"
                     /product="SJ_28"
     splice_junction complement(143148..143149,144188..144189)
                     /source="new"
                     /gene="SJ_29"
                     /product="SJ_29"
     splice_junction complement(25398..25399,25558..25559)
                     /source="ncbi"
                     /gene="SJ_30"
                     /product="SJ_30"
     splice_junction complement(147189..147190,147401..147402)
                     /source="new"
                     /gene="SJ_31"
                     /product="SJ_31"
     splice_junction 77307..77308,77861..77862
                     /source="new"
                     /gene="SJ_32"
                     /product="SJ_32"
     splice_junction 120825..120826,120923..120924
                     /source="ncbi"
                     /gene="SJ_33"
                     /product="SJ_33"
     splice_junction 68164..68165,74972..74973
                     /source="new"
                     /gene="SJ_34"
                     /product="SJ_34"
     splice_junction 28116..28117,28232..28233
                     /source="new"
                     /gene="SJ_35"
                     /product="SJ_35"
     splice_junction complement(147823..147824,153695..153696)
                     /source="new"
                     /gene="SJ_36"
                     /product="SJ_36"
     splice_junction complement(147192..147193,147401..147402)
                     /source="new"
                     /gene="SJ_37"
                     /product="SJ_37"
     splice_junction 28307..28308,28452..28453
                     /source="new"
                     /gene="SJ_38"
                     /product="SJ_38"
     splice_junction complement(144729..144730,144880..144881)
                     /source="ncbi"
                     /gene="SJ_39"
                     /product="SJ_39"
     splice_junction complement(148190..148191,149610..149611)
                     /source="new"
                     /gene="SJ_40"
                     /product="SJ_40"
     splice_junction 74088..74089,74972..74973
                     /source="new"
                     /gene="SJ_41"
                     /product="SJ_41"
     splice_junction 75030..75031,75243..75244
                     /source="new"
                     /gene="SJ_42"
                     /product="SJ_42"
     splice_junction 74858..74859,74972..74973
                     /source="new"
                     /gene="SJ_43"
                     /product="SJ_43"
     splice_junction 75030..75031,77861..77862
                     /source="new"
                     /gene="SJ_44"
                     /product="SJ_44"
     splice_junction complement(144491..144492,144602..144603)
                     /source="ncbi"
                     /gene="SJ_45"
                     /product="SJ_45"
     splice_junction complement(145958..145959,146055..146056)
                     /source="ncbi"
                     /gene="SJ_46"
                     /product="SJ_46"
     splice_junction complement(117704..117705,117801..117802)
                     /source="new"
                     /gene="SJ_47"
                     /product="SJ_47"
     splice_junction complement(117863..117864,119365..119366)
                     /source="new"
                     /gene="SJ_48"
                     /product="SJ_48"
     splice_junction complement(148190..148191,153695..153696)
                     /source="new"
                     /gene="SJ_49"
                     /product="SJ_49"
     splice_junction complement(146623..146624,147023..147024)
                     /source="ncbi"
                     /gene="SJ_50"
                     /product="SJ_50"
     splice_junction complement(147823..147824,148066..148067)
                     /source="new"
                     /gene="SJ_51"
                     /product="SJ_51"
     splice_junction complement(146131..146132,146289..146290)
                     /source="ncbi"
                     /gene="SJ_52"
                     /product="SJ_52"
     splice_junction complement(145563..145564,145647..145648)
                     /source="ncbi"
                     /gene="SJ_53"
                     /product="SJ_53"
     splice_junction complement(147303..147304,147401..147402)
                     /source="ncbi"
                     /gene="SJ_54"
                     /product="SJ_54"
     splice_junction complement(145759..145760,145852..145853)
                     /source="ncbi"
                     /gene="SJ_55"
                     /product="SJ_55"
     splice_junction complement(123647..123648,123726..123727)
                     /source="new"
                     /gene="SJ_56"
                     /product="SJ_56"
     splice_junction 743..744,828..829
                     /source="manual"
                     /gene="SJ_57"
                     /product="SJ_57"
     splice_junction 149505..149506,149590..149591
                     /source="manual"
                     /gene="SJ_58"
                     /product="SJ_58"
     splice_junction complement(135372..135373,135481..135482)
                     /source="manual"
                     /gene="SJ_59"
                     /product="SJ_59"
     splice_junction 5060..5061,5908..5909
                     /source="manual"
                     /gene="SJ_60"
                     /product="SJ_60"
     splice_junction 153822..153823,154670..154671
                     /source="manual"
                     /gene="SJ_61"
                     /product="SJ_61"
ORIGIN      
        1 cgcgttttaa aaattacgtt aaatcccccg ggggggctaa aaaaaggggg ggtaataacc
       61 ctaaccctaa ccctaggtct agccctaacc ctaaccctaa ccctaggtct agccctaacc
      121 ctaaccctaa ccctaggtct agccctaacc ctaaccctag gtctagccct aaccaaaaca
      181 ttaaccctaa ctaaaacatt aaccctaact ctaacaccaa ccataacact aaccataaaa
      241 ctatccctaa cactacgcct agccctagcc aaagtactaa ccctaaccgt agccaaagta
      301 ctaaccctgg ccataaccct agccataacc ctagccataa ccgcataact ctgtccacaa
      361 ccctaacagt gatcctcgca tccgcaccta acgctgcccc tctttcacac catcaccccc
      421 tgccgcttca acttcacctt cttcctccat ctcgccccgc ttgtttctac acttgtccac
      481 ccctctattc ttactctagg atgccgctaa cggtgccata tcgtcttccg ctctccaact
      541 attggtggct actcttgggt cgacattccc ttcgtcatgt tcattcctac gtgcgtctgc
      601 acaagggtct acgcattcct ttaccttggc ccgagcagga atgcctacat ttacatccta
      661 agccttacaa gtgtctcctg cgttacccct gtataacaac acaaccgcat cttcttcagg
      721 gctggcctac gaagtcttct ctatgtgagt gtcatataca tttccacttt ttcacatgat
      781 ttattgcgtt ttgtctacta caccgggtac attttggttt ccctcagggt tcgaccctaa
      841 accctaccat ccttcggccg acagcaagtt gctaccgctg ggcctgatca cgctgtccgc
      901 ctgttccacg cgcgtgtcgc agccgacacg ccggagcggc ttcgacgtga cagatctgtc
      961 tctcagctgg ctgacgggat cgtccccttg gctcgtgatc ctacaagggc agggggggtc
     1021 tctgttctgc cacgacgtgc tgcaaggccg actctatgtc ctgtcgcact ccgtgtcgct
     1081 ctttctaaag acgggcctcc gccactgcga agccatctat cgcgcaccgc tgtggcgcga
     1141 ccgacccctg ccgagcctgt ggacgtgccg ggaccccgac aaggccttct tgccgacatt
     1201 actagcgaga agcgcccgac gcggcctggc cgctttctac gccctgtgga gactgcatct
     1261 gggatcccgc tcagagctct cccaccccgt gttacagtgg gagagaacag agctggtcct
     1321 gacggactgg agacgcgggc gaaaggaggc agagagagtc ggccccagcg tcgcggaaca
     1381 cttcgcgagg tgcaaaccgc tgctgaacga actgtgcgga gagggcggct ggcttccctt
     1441 cgcgtttctc tccacatctc cgcacgtctg gctgatccta acggaaggag gccccgtcct
     1501 ggcggttgac gtgaacgaca cctccgtgtg gcgcatcgcg gacgacctgg agctgctgcg
     1561 tcgcctgggg aacctgctcc tcgtctcagg cctccggctt cctctccgtc tcccgagcgg
     1621 gagcggcgag gcggccggag agccggggta cgaccaagaa gagagaagag ggagagcgtc
     1681 gacggcgagc gcgacggccg cgacgtcgac gcgcggaccg acccgtccga cacgggtgac
     1741 gcgtaagggg cgtgtggcaa ccggaggcgt ccatctcccc gcacgccccg aatctgagga
     1801 acagacacac ggccaccacg ggcgccagga gagcagccac gacgaccagc gcggcgggag
     1861 cggacgagga caccgcgatg acggcgcgca ccgccacgcg aatgacaaaa cagagcccca
     1921 gcagcgcgga gagcacgagg aagggaaaca gaccgactcc gggcgccacg agcacgcaca
     1981 ggagagccag gtcgcaagaa gagacgagga gggaacggag cagggcggta gcggaaggag
     2041 ctgcggggga gcgacgcaga cgtacggcgg cagaggccga catgattcct gcccgtcgat
     2101 ccccctgtcc gtccccgggc ccgatccccg cctgtgggtc cctccccctc atctgttatt
     2161 cccttcccct ctgccaccga tgacgcccgt cgacgacgag ccgtccgtcc gccctcggtg
     2221 cccgccgagt cccgcggagg aaccccccac gtgtcgtccc cgtccgcccc gcccgtcgtc
     2281 cgacaccccg ctgtccgctg tctcgcgccc ctccgctccg tccgtccccc cgccgtccac
     2341 tgcgcgtgtc cgtttcttcc tctcttcctc ctcctcctcc ccgtcctact gtccctcccc
     2401 gttgtctccg ccctctcccg tctctccctc gtctcccaga tctccgttca tcccccccat
     2461 cagatctccg ggactccgag cgaaaccgcg agtgtcctcc gggcatcccg cgacgttccc
     2521 gccggcgccc tcgtccgcgc cggcccgttt cgaaagagtc ccgtccgctc cctcatcgga
     2581 atctccgtcc gcgccgtgcg tcggcaagtc acagccgccc gccgcacaca cggcgtgaga
     2641 cgccgcgcga ggcgacggag gcgacgaaag aggacgggaa gaacaggcgg aagaacacga
     2701 agacgaagag gaagaagaca cgaggacgaa atgaggggaa cacgccggag accgagcggc
     2761 ggatggagcc cgctcggtct cgcacgtccg cgatacccag cgggctccgt cgccgctccg
     2821 gacccgaggt cccacacgcc cccacctcgc gcaccgcctc cgccaccacc gctgacaatc
     2881 tccgcatatc gcccccatac acacccaaca gcagagtccg gcgcacgcac acgcgcggag
     2941 cacgcacgag aacacgccag acatcgaccg ccggaggtaa cggagcccgt gcgccgtccc
     3001 ggtttcagcg ggagtgtgtg cgggcgtacc gtcacacgga aaacccagcg ggacgaaacg
     3061 atcgacccac tcccgctatc cgccctcccc gagcacggtc cacacgccag tccgtaaaat
     3121 cacccgaggg gcggatccgt tccgcgcccc tcgcccgatc cgccccgata aaaacaagtc
     3181 atctcactcc tgccagttca cacggacgcg accgatgaca ataaaaaaaa aacacacccc
     3241 ccaccagcga acgcccgccg gcccaaccac ctcccctccc acccccgctc gagtcgcgca
     3301 ggcgcgtcga cgggcagtcc ctcggacgcc tccacggcaa cgctcctccc ctgtcccctc
     3361 ggtccaaccc ctcccatccc cctccccgga gcacacacgc cgactccgtc cgcagaggcg
     3421 gcgaccgcag cggcagcgga aactgtaacg gccacgttct ccgaacagcg acagtaacgg
     3481 cggcggcggc ggttgtcgcc gtcacggtag tcgtggcgga gcacccgggg aggcgacgac
     3541 gggcactacc ggcgccgaga tcatcgcgct acgaaaagag tagccaatgt aaaaagttaa
     3601 aggttctttg tatatcaaaa aaaaatacta cgtggaaata aaaaataaaa aaaaatatac
     3661 aatataaaag tgtattataa aataaaaaca gaataaagac tagacaccga ctaaacgctc
     3721 atccttctcc gtacgtcccc tttccgtaag tgccaaatgc cgcatatcca tgaacggaca
     3781 cacgccggta gaatccgacc ttcctcacaa caggtagccc gcgacctaag cacaggacgg
     3841 tacctgaaac cgaaagtata aagggcggcc tcccatgttc cgcccatgag gcgggacttc
     3901 gagacgagcc acccttcgta tacgtccggc ccctcccgcg cgcgcctata ggacgcaccc
     3961 cctcgttccg aaaccgctaa agggtacagt cgccgtcaca ccccctgtcc ctagctcgcg
     4021 acgggccggc gcagaccctg cctcggcggc aaagccgaga cgagaccccg acgtacgcgg
     4081 gcataaagaa cgagaagtcg acgcgcaatc ccaaattatc gcgagaccgt ttgctcgggc
     4141 ccgccctcgt cctcatgccc tctccccgcc ctcatcccct tccacacccg gtagacaaaa
     4201 aaaaacgaaa aatacatagg taaaagtaat tttcgcggtt aaaaatttgt ccacgtgacg
     4261 tccccggcga ttcccggaga tgcgacacgc gacgcattgg cccgttgaca tcggggtccg
     4321 catacgcggt tcccccgggg cgtcgcgacg tcggtgccgc agaaaacacc gcggtccgcc
     4381 gtcacccttc agtcacgcgc tatttccgcg atcgtataat ttatctccac cgacacgggt
     4441 tctgtctgtc acttctcacc gagccgctcc accaccgaca gtgtcactga ccacatcgca
     4501 tacgtgctgt tttgcctgtt ttttgtttat atctccaccc ctccccgtca cagaccagcg
     4561 aacaccttgc cacatcgaca tcgactacac tcgacctcgc atgacaacgg tcgccggtcg
     4621 caacgcagct gcagcgggcg gcgaattaaa aaaaaataac ataaatatag tgaaagagag
     4681 gcccccgtcc cacataagga cagaagaaca ggcaaaaaaa aaaacccgtc cgttattcac
     4741 gcagcatccg taaagccatg tcgacgcgac acacacagag gacgggcgga cgcatcccgg
     4801 tccggcgcga cagggcgcga ctggcccagg cgcgagcccg tgcccgcttc gagtggctac
     4861 tcctggcccg cggcaggcca tccaaactct acggctatgc gagtcggcat cgcggagaac
     4921 tgatccacct accgtggccg ccgtgctggt gtctagaact ccaccacgat ccgtacagag
     4981 acgccagaag tgccaccgta tggggccacc gctggggttg gccgccgacg cacgtgagac
     5041 ccagatgcgt tcaagactgc ggtgagtgga cgtacgggcg agccgcgggg agggatgtcg
     5101 gtcagagagt gagtgggtac aaggttcgtc gagaaccacc agagacaccg gccggtgaac
     5161 agtggggaca aaaaaaacgt cacgtcaggg gcggagaaat atagggtacg cagaccgtca
     5221 aacggcgagt aacggaaaaa cgagtatgaa tacgaggagg ggggaggaaa catagtgaag
     5281 tctgtggcgc gcgggatcgt caaccggcaa agccgatgat ggcctccggc cccagagacg
     5341 gctcgcggag tggagtccag ttattgttat gtttttgtaa tgttttgttt atccacaatc
     5401 cggtatccgt gaatccccgc ggaggtactt tccattaacg atggtacagg cggtatgact
     5461 tccggaacac ggtgattacg gatatcctgt ctcgtttacg cgagacctct ttgttttaat
     5521 ctcctataac ggtaaaaaaa aaacacaaaa gaaagattag agctcctcct tttttatgcg
     5581 ttatggcatc ctcgcatcag tcaccattcc tgtggcgtgt gcttttcgct ttgaattgta
     5641 cgcgacagga tccgaatccg ttatactccg caagggcata gcgaccacgg ctgtatgcgg
     5701 catctaccgt cgcacgggat gcctttgcgt gtgcagatgt gttgtgcttt ttttatacgg
     5761 tcagagacca cagacaaaaa taaggcaacg ccagccataa cgtttatggt ttcttgttgt
     5821 tttgtttggg ttatgttcta cgcctcttct atcgtgtcgg ccggatccat catgttcaat
     5881 cgttcacgta cgcgcgtccc atcacagccc tagactcctg tctgtacgta tgctgcggat
     5941 acggagagaa acttcaaccc gtgggtttcg taaagtcgta tgtaaccaac tcccagctcg
     6001 acacgctccg cgtgctcctg gtgggcaaag acggagccgt gtatgtccac cacatgagag
     6061 cggcaagact ctgccgactg gcgtcgagca caacggagtt tacaagacga gggctgcaac
     6121 gcgacgccgt gacgtatgaa gaagacctag agctgccgga ccagcgtatg tgcggaacga
     6181 acgcccgaca tctgttcgac gtgatcgccg cggccgccga cgaacacaac ctgctgaccg
     6241 tcggcggcct gtgtcagacg cacgccggag tgtcctgcag cttactagag accgtgggag
     6301 atccgtggac ggcggttccg gccgcgcgca tgactctgac cgtgccgcag gtccagtacc
     6361 aattatggcc cgaagcccgg agagacctcc gccggcacct gtacgcggga catcccctgg
     6421 gaccgtggct cgtgtgcggc gttctctcga gagagagaga gacgcagagg ccgtcgcctc
     6481 ccataggcag cggcggcgcg actgtaggaa acgtggcaac gccggggcca cgcgaggtgg
     6541 agatcgtttg ggtggtcttg actttggcgg gaccgctgtt agcgttctgg cccgataccg
     6601 gcaagatctg tcgtctggca aactcgttct ccactctatg gaggatggga ccgcgggcca
     6661 tgagaggaca ctggacatat tcggccccgg gtagacatct ccccggggac gcgtggccac
     6721 tgtgcgaaca cgtgagaccg caggtgggaa agcttcccag gaagagagcg tacctggatt
     6781 agacgtcaca gaggtgacgt aagcatgtca cctacggcca gagacgtgac cggaggaaaa
     6841 tcatgtgtat gtgtggggtg tgtatgcgtg gggtgcgtat gcgtgcgcgt actcgttttc
     6901 tccccccctt ccctttaacc ccacgaaaaa taaaatccac gaacgtagac agtcacacac
     6961 agggtgctta cgctccgtgt tactgatggc aggtaaccaa aaaaacgtat gtgtcgggcg
     7021 tcatgcaccg ccgctctata gcatagtcgc tatatcagcg cccgatgcca acgcgacagg
     7081 gtgagtcaca tagatcggga ctgcttcaaa gtgcgtcgtt cgcctcttat ataggcaccc
     7141 cggggggtgg gaggagtgaa catccaaagg aggtgcgtcc gggattggag gcgaacgtag
     7201 aaaacgaaca gcgtcagaaa aaaataagaa aaggcggaga cacatagcct tggcgggaag
     7261 acgacaacag gtttaaaaat agacagtgaa aaaaatagca gactgtgacg tccaatacac
     7321 atgtggcgat catccaatca acggggtgta tccaggcgca gaaacaaaag tatgcggaag
     7381 tacacacgac acggtaacgc ggaccgaaga cagagggcga tcgctagcat ggcaagtgta
     7441 agaaaaaaaa accacgttcc aaaaacacct atacgggaaa catctcttca ctccctcccc
     7501 gtcccaacca ccgcaacatt cacctccgta atccgttgtc tacgcgtttg taccactgac
     7561 gcgcagacac gcagacacac agacacgaca acccacccat gtggcagtcg cgggtgggta
     7621 cgtagatggg gcatacgggg gtcagacttg aagacaattc agaacgacat cgcgcgcgac
     7681 gtgccaccgt ctggaaccca cgatctcctg gcacggtgcc aaaggaaacc gccggccaac
     7741 cctaacccta accctaaccc taaccctaac cctaacccta accctaaccc taaccctaac
     7801 cctaacccta accctaaccc taaccctaac cctaacccta accctaaccc taaccctaac
     7861 cctaacccta accctaaccc taaccctaac cctaacccta accctaaccc taaccctaac
     7921 cctaacccta accctaaccc taaccctaac cctaacccta accctaaccc taaccctaac
     7981 cctaacccta accctaaccc taaccctaac cctaacccta accctaaccc taaccctaac
     8041 ccatccccca acgcgcgcgc gcacgccgct atgggaggcg ccgtgttttt caccaacacg
     8101 cgcgccgctg cgagagacgc gtggaaaaaa ctcccctctg ggtgcggccc gagtcgcccg
     8161 cgcgcggaag acacgcgtgt cgtggatgcg cgagctcccc cccccgcacc cccggaagag
     8221 cggacgacgg tacaggggcg gacggcgcgt agtttaaagg cgagggtgag cgcgaagaac
     8281 cgatggcgcc ggcgagagaa agagagaaag agagagacgg gaggcagagc cgcagagggc
     8341 agacgaggag acgccggagg agagagaacg gccgcggtcg ttcccgagga gggcccgcgc
     8401 gcggcgcgag agagggtgga gagcggacgc gcgtagagac gccccgccgg gcggttggcc
     8461 tttccgcaga catttttgca gacccccgac ccgtgtcact gatgcaaaca cgcgcgcgaa
     8521 cgtacacacg cacgccgacg cgcccccacc gagcagaccg ccacgtgagc gaaaacacac
     8581 gcgcgcgaaa aaaaaaaaca cacaaaaaaa tacacacacg caaaaaaata cacacacgca
     8641 aaaaaaaatt atgtatgcat tgttatcacg atgttaacat aaaacaacaa caataacaac
     8701 aacaataaca acaaccacag tagcggcatt aactacatca actacattaa cagacgagga
     8761 cggaatcacc agatgtcgac tcctccgtct ccgtctcctc gtaatcccca cgaactacgg
     8821 tagaagctcc gcaagacgcc acgggcattc ctcgttctac catgtgcgga gaaagttgat
     8881 agacggcggg cagatctatc acaggcgcgt gaacgcaagt cacgggcagc tgcatggtcc
     8941 acagatgtcc cggagggaat cgatggttct tgaagagttt cctcacaccc atggcgagaa
     9001 acgccctgaa actatcggag agacgcacca cggctccccc gtcgagactg gccgcgtaca
     9061 ccttgccgtc ctgatccatg agcacccgct gtcgtctaag cagaggtgaa gtgacgcccc
     9121 gtccgaagaa tctaccgatc accaccgcga cgccgccgcc gggtatgagc cgccacctct
     9181 tctccggcct cccgggtacg gcgaactcaa agaaagcccc gcgcggccaa ggcaacggca
     9241 cgagagcctt atcgaaagac acggcgaaag ccagggcgtc gtcaactcca ctcatgccgc
     9301 cgaagaaaga ggcgccggtt tcggtgagac acttggaacc gtagacgggc tcgaagcgac
     9361 gcaggccgtg tttccagaga ccgaacgcgt cctcggcgag acgatacagc gcgtcgtcga
     9421 acacaccgtt aaacgcgtag atctccccgc actctccgac cagcaccagc gcggaaactt
     9481 ctgcgaagat agtgaccccg atgaccgtga gatccatacc gggacagcac ccgtatcggc
     9541 gagacagctt ggccacctcg gcctgcgtga tcccgagcat gtcggaggtg gcgaacctca
     9601 gttcggcccc cacgggccac gggagcgcca acctgcaatg tgcaaaagta gagacgaagt
     9661 cccacacgtc gtccgccgac agcggccggg tgacgagagt gcgaacgaac gccgtccatt
     9721 taacctccgg gacctccgca tcgcaccgca agtcacgtcc cgcagagaaa gagcacgaag
     9781 gaggacacag agccgcagac gccagactcc aagaagatat gccgagaaac ggagagccac
     9841 aaaacatttt attttctgtg cggaatccga gataaaatta aaaatggaaa acaaaaataa
     9901 aaaatacaac gataacgaca gcgttaccgg aagtctcgca taaacgtcta cgatcgcgtt
     9961 aaggatacta cgactgttag ggaaaaaaga cagcgttgaa ccgacacatt cccgacgtta
    10021 tccacgaata taaaaatgaa ccgaccgccc gcaaaactgt gaacacatcc ccgggtaaaa
    10081 tatacaacga tcccagacgt tagaatcgcc cgtaaaaact cgatctatcg cgtttccatt
    10141 ctctttattt tttcttttac tcaaccaccc acattcgggc gaatcatcga accacgtcgt
    10201 gtacggcact cctagtacca gcgtccggaa atttcttgcg ctcgtcgttc ctagctatta
    10261 aaaacagcac atcagcgtcg gcctgcctcc aagttttctg ataaaacatt cgcgatagat
    10321 gacaggtagg aagaagcgcc cattcgggct gctccctacg gaaaacgtag ctcttataat
    10381 actgagtgac tcctatccgt ctaaactgct gaaaatcttc cgccacgaag cgcggccgtc
    10441 cgtcttcgtc gttgtcgttg aatccgaaaa tctggccgtc gtcggtcacg tagagagaaa
    10501 tccgaccttc gtccccaaag tacttgtatc cgaagctgcc gaagaaacac atctccgcga
    10561 gcctgcgccg cgcctcgtcg cacatgacga aggcgaaaga atcccgccgc cgatgaaaga
    10621 gcagagtctc gttcttgggc cacctcaggg cgaaagaacg acctatgtgc cggtctcgaa
    10681 aacacagcac gtcccgacaa ctgcggacgc cgtccacctc ggggtcctcc accacaaact
    10741 gcagcgatga caccagctga tgtgcgtaat agaacctctt cagaccttta cgtagaaaat
    10801 cgtcaatggt gtcaccgacg cggcacagtt gctgcggcaa taaccacgtg tgcgcataaa
    10861 cacgaccggc gccgccgagc agaacgacta tgtcaccttt cgaaaaccag taacacggct
    10921 ccgatccgat cccccccctt ttcttcacgt atcccagtac gacgaggcgc tccgggcaac
    10981 acaccagacc ggccagttcg tccaactttt catcggcata ttcattctcg tctctacagt
    11041 tattgatgac cagctggtat ccttcaggcc aagccaaagg aattcgcctg ccgaaattta
    11101 cgaacgtaaa cattcgaacg ctattcaggc acgtatagac gcgcaagaga tctacgagat
    11161 ctctcttcga ctcgttatag acacgttgac gtgtcttggt cctctcccga gactgcagct
    11221 cagcattccc acacatcgta gaatcttgcg ctggctcatg aaggcctcca gtaaatcgca
    11281 cacgccggtt ctttgtcgtt tccattacgg gctcgcagta acagagaaat agcacccaaa
    11341 acttacagac taagcaaaag ttgcaaaaaa aaaatgaaag ataatatagt cacaaaagaa
    11401 ttctgtcaca atgcacaccc aaggacaacg atatggatga tcacgacaac aataatatcg
    11461 ttttttcttt gtgaaaacta atcagtaaaa gcgtaccggt tttccggatt cgtccgtatc
    11521 agataaaggt cacacaagcc ggcttaggaa cgcggcgcgc ttcacgaatg tctaaccctc
    11581 gctgctgcac gcgtcttata agcctacgtc tgacgactat tcgcttctga cgtctccggt
    11641 gctcctgcag cctgatgtca aacgagccgc cgccgcgcac agcgtaagga acgacgttcg
    11701 gatacacccc actccacata tgggtcccgt aaaggttgca atcgtgaaaa cgaaaaaacc
    11761 taaccggatt cgacatgtaa gataactcca gagtattgag gaagccctcc aggacgtcgt
    11821 gccttatctc gcgagcgagt cgcatggatg cacacaagtc gccgagacag atctttttaa
    11881 ggcacagatg ctctaagaga gcacgaacgc gatgccgttc cttgtcataa cccgatacga
    11941 gaatcgccac gatctcaaga aagaaaaaac acaacctagg gacgcgcatg ggatctttaa
    12001 tctcgaactg agaactgaca actaacagtt tgatcctgac accgcggagg ccagaaacgg
    12061 tatcgatgca acgctccatt tcggagatcg cttttacgaa gaaacgagca atggcagtga
    12121 gatcactcac gatgcgctgt ttgacgcgtc tcagtagaaa cagacacaga acgatgttgc
    12181 agtacacctt caagatgtta cgttcaaaat gccctctccc caactgctta tcatgaagaa
    12241 tgggcaaatg ccgcctttcc atagagttaa ggatgagaga agagccgaga tctcggtcga
    12301 tctccgcccg gagagcgacc gcctcacgcg cgtcgaggtg cagctggcct aaaatgagat
    12361 cagccggatc gaattctgaa atatcggata tgtgcacggc ccgggaatct ttcttaccca
    12421 gatagatccg aaagagagac gcccggcact gatcgcaact acagagcaca gaagacacaa
    12481 agcgataaga agaagcgtac gcgacaaaga tgtgatcgga caaaaagtgt ttcaagagca
    12541 cactcgtcgg agacgccgcg tcgccataga tctccttggg attgggcaaa atatcgaaca
    12601 gggtcaacag agtattggac tcgctcctgt tcctcaacat gaggaactgc aggaagaggg
    12661 agtccaacaa ctccaaaaga cggttaaaat gcgccgatat agtatccctc ttctccccat
    12721 cgacgatgta ctccagaatc gagaagtgcg ccagcgcggt gcacttggtc aggagtcgat
    12781 aaaaaactga cgtttcgtcc tcaaaagtta accgttctaa gagagacata aaagccgaga
    12841 gatccatggt cgtctttcca cgcctctgga attcaacaga aactttctcc gccagagccg
    12901 cccagagaac actatcgtca caaaatcgta agccgcgggt cataaacaga tcctctgcgg
    12961 tcaacgtgcc gctatctata atcatctcct ccgttatgtc tttcagatca acatcaagtt
    13021 ccctggaatg atgaacggta agcgagagat agggatggtt gggaatggta tacgtgaccc
    13081 gttctcggac gggtccctta taaatgtcgt ggtccaataa ctccatcact caagtaagta
    13141 tatatccgag acagcgttta ttttccgtcg cggaaaaata aagataaacg agcagaattc
    13201 aaattacaag agacggccac gtacatcaca atcgagaaag cacacaatca ctcatcccca
    13261 ccatatccat tcagttcgcc gggacaatcc ggtggtgtgt attcataata cttgtaatca
    13321 tccctgagga cgtccaacga ccccaattta tatgcgatag ctctgacgtc tttctcggga
    13381 cttatttgaa aaccgcgatg attgccactc ccaaaatatt tcaagccact gaaaaaaaaa
    13441 gccatagtcc cgtttatgca cctggtgtta gttaaataat cttcggcgac gggcaacact
    13501 acccgttgta gccgctgtaa gaaattctct ccatcggtat taacgataaa aaaccccgga
    13561 atgagattat cacaagacac caggtcacga tcattgtcct cgtgaaagcg ttttacatga
    13621 agatgatgca taaaaaacat ttccatgaac ggagtctcgt cgtaatcttt gtaggcagga
    13681 acggaaaaac cgattctcag agcttcccaa cactttaaga taaactgact cttttccccg
    13741 ggacacctaa caatttcttt catctgtttc atcggagaaa agtaacacag gtctcccaga
    13801 cacccattcc gccccagctt catctcttcc tccatggcca cacacaattt ccccacttcc
    13861 tccgtgaaga ggtcgtaata tatgtccaac tcagcattta tgacacggta gagggtgttc
    13921 acaacgaaga caatgaagac aatattagtt aagaaggtta gcaatgcctt cttatccgga
    13981 gtgacagaga tctggagcga aataggcagc ctactgagct ctatctgacc ttcgatcatg
    14041 ctcaacccta aatccttcgc tatgagactc gacagactca catcgtaggg ttcaccaaga
    14101 tgcagaaaag ccggaaggcg aattgaacct atcataggaa aacactggat tcggacactg
    14161 tggccaaaat caaacttcct acctctcttg ttatacatga taaacatgcg cctacactcg
    14221 acacaaccac agaggagcat aaagtgttcg ataagacagg attcgatacg ctcgaagaaa
    14281 tcgtacctga agaaaacatc ggatttgttt tccaagcagt ccttcaattc ttgaccccaa
    14341 tgacaaagat tataacctcc cagttgccga gtagattcct tggtcaactc ttttaacttg
    14401 ctttcaaact gaaataataa catggaggca tactcactta gataacgaca ccagtagccc
    14461 agcgttggtt tggacgtgaa gttaaacaga gatgctccgg catagagacc gagaaaagcc
    14521 agtttagtga tgcactgcca cttctcatta aaattgtcca taaattttaa gcctttcacc
    14581 atgtccgcaa tctgatcggc tctgatgtag gtggaaggat acttgtaagt ttcatactca
    14641 taatccagca gtatgttcca caccaagcag tccgaagagg gatgtagtcc tttaatgcca
    14701 aatctagctg ctgcggtccc ctgcagaccg ttcgtcaacc tggcgcggga gacgggaaca
    14761 acaaacctgt tggtagcggg cagtcgaccg acgaataccg gcgtgagaaa ttttgtgata
    14821 aatttaaccg tcggtgaatc ctcttcatcc agacgcaccg caaacagaat tttgctacgg
    14881 tctttcacaa gcctgttgta agaaaaaaaa aattagcggg gagtctccat cctcgaataa
    14941 ttatcctctc tgaaaaacga cacagaacac atccacccac ctgtcctttc gcacgcacat
    15001 atgccgaggc ttactacgga gaacgggcaa ctccccattc aacatcctat tgagattctc
    15061 cgtctcagtg tcacttatat aaaataaggt gtcgtcactc caatccaacg aatacttctc
    15121 tttatagagc aactcatcaa atcctctacg tatgaaagtc ctcaaacttt tagagacttt
    15181 gctgattttg ttttctacgt agatataaat gtgacagttc gagcccataa cgatagcagc
    15241 tctgcaattc ggttcagcct gagaacgggc acacgtccct atgatagcat aatccttttc
    15301 tgtgattttc tctagaatgc caggtccagt cagataataa atatccgaca aggaacaaaa
    15361 ggaaaagtca aagtcctgga aagcatccac cctgattctc tcgccggaat gttttgccac
    15421 gtaatccttc atagcaggga gattcctctg taaaaggata aattcctccc ggccgcattt
    15481 agtctctccg aaccacatct tttcctgctc tggatctaac tccgcttcgg caaaaggcgg
    15541 aaattgtcta agtccaatat tgaagaactg aaccaatgat tctgctatga tgtacacttt
    15601 ctccgtcacc gtgtccacgg caatggtctt tccggttgaa gtatgcatca cgtatggatc
    15661 gtagtcagga tttggatcac gatatatcgg gtgagcatac ccaacagcgg acataaattc
    15721 atcagcatcc agcagactgc tccagtcata agcactgacc cacctatgcg tgtgaaagtg
    15781 ataaaactca cccagggtta atgcatacat gggaggccag gcgatacaac accgcaagcc
    15841 cggagaactg atttccaacc cgtctccgta agctgcagac agaacgtcca catcaaaatc
    15901 caaagtaggc acacatgatg acaaggcgaa ctcgtcgttg cagaccggta cgatctctgt
    15961 ttgaaacata aacacagaat aaagtaaaat actttcacac aagactcgct ctccgccctc
    16021 cgtttcaagt atcagtcaaa aatttcacac caactactta ctgagactca tgcacgattg
    16081 ataagtttcc gacatgccca acgtcgacat ccgtccgaag cgcatggaga tttttccaat
    16141 cttctcataa ccgcagtccg caaaaagtct ggcaaacccc acgcgcaaaa aagtcagtag
    16201 acaatcgccc agcttaacca gcacgttgtc tatccaatcg taataatata tttttccaga
    16261 tttcccaata caaagaatag gtcttgtaca tttagactcg taatcatggt cattcaggta
    16321 acctaacact actacttttt ctactaagtc ttcctgttct tttagatttg ccaagcgaca
    16381 tgtcgctgtc cagacactgt cacgagtccc tagagtcaaa ctcttaaaaa ccggcatatc
    16441 caatctaaga tctcggccga tgttgagaga cacgaaacgt tccacatcgt ccaaactggc
    16501 acaacgggcc agctcatcaa actcccgcaa catggcaatg taatgtttcc tcatagcctt
    16561 gatgcccaaa acgcctttcc tattcaactt cacatggaca tttagagtat agggactcct
    16621 taacacatca ttattcatta agttttcaag cgattcgaat ctggggcctt catacaagcc
    16681 atgacggtac acaggctccg cgcatgtgat gatattagta cccaggacgc cgtatctcac
    16741 aaattgctca aaattatcac acacaaagtg gagagtatcc gtctctaaat cgtgcaagaa
    16801 aattctttta gatcgaccaa tcagaattgg aacatctctg taaggaatct gaatagtccc
    16861 cagtagacac agtttttcca caaaaccctg atagtgatca tccatatctt caaacatctt
    16921 ttcagtatat ccagctacat ctttacgcgg agtgaatctc agccagcagt tccgaggcca
    16981 gataatagac agacaccagt tcttatacct gccgacaaaa ttctcgatct gagagagatc
    17041 ggcagattcg cataaacggc acaattcggc aagagcgtta tcgttcggaa tatcacctga
    17101 aatctccttc gcctcgaggt ccatcttgaa aactccgatt aacactagaa gtgaaacaat
    17161 gaggtatctg aaatataaga cctggatacg agacgccgtc acatgacagg aaattgcaaa
    17221 aaaacagagt ggtgttacaa actttattaa atttcagcct ccgttttgac tcacacgctt
    17281 tcctccgcat gtacaaataa atccgttcca tcgaccattt cttgcgaatg ttgaacaaca
    17341 aacaccttca tttcctcgga attatgaaaa tcttccttac atacatcaga agcgaaagta
    17401 tataaacact cgcattccga aagttttata cattgcgatt tgacgtagct gcaatccgca
    17461 ttcaaacctc gcactccgta ctttaagaag gaaacctcca tcgttccggc ttctgtattg
    17521 cactcctcgg atttcgattt agaaaacagc tgtacgactg tcttccataa ctttctaaca
    17581 gccatatcgg cagatccact tcagagaaaa cgaactcgaa acaccactaa aaacagatgg
    17641 aaatagtcac atacaagacg gtttcagcga gatctccgac cgtcacctgg tcatcgggat
    17701 tcggacgagc tatagcctcg attcaaaaac ggaatcaaga taatatcagg aaacccctac
    17761 gcttctacag cggtctccta cactgcctta taaaacaata tgagcattgc ctcgtcccgc
    17821 caaataaatc aatacgtttc gacaaaggga agattgaagt cgctgcccta attctagatc
    17881 tcggacacca ggtacttggt cgtcagatac acgtacgaca acgtatctac agctggacta
    17941 gcatcacact ccctaaactc tttaccccca aagaacttta ctttttagtc gcctctccag
    18001 gagaagaaaa catcgcattt aatccaacta taacaaaggg aggttggatc tcggggagtt
    18061 tttcgtatcc cgttgattac agatcaaact tttcgctaac cggaatgtct gcgaacatat
    18121 taatggtgcc gttcgtaccg tacaaatacc cactaaacta tgctcgcttc atatcgtcaa
    18181 tcgacctgat gatactaaac gaacaatttc cggaacacga atgcggagat atacagattt
    18241 taaaacagcg aaactacctc tacctgggag tcatcaaaaa tcttacgtgg aaaaaaagcg
    18301 tcaccggcac aggtcagacg gctccacata gaatcctaaa agcttcgttc ataggaagtt
    18361 ggccggacac ctccctgcct gacagagtgg cactgcgttt ctttaataac actaggttta
    18421 caatacactg ccacgaattc tcgattaaca ttgaaaatct cggtctcgtc aaaaacaaag
    18481 aaaaagtttt tgggacacta gccaccgtat gctgcgagca aatcccttct ttactaacaa
    18541 cggaaaatct accgagatat ttaatagttc agtttgaagt ggtaacgcaa atcgaagagc
    18601 ccgaaccgct gttattttcc agtaacccga aattatattt tacaggagac gtactaaacg
    18661 caacgataca actgcaacac aacccaaatt attacgagct acttgtatac gcaccatatg
    18721 acatccattt ctatccaagc cgatgccaca tagtaattct acctatccga tatttcacaa
    18781 agcccgataa gcaaatcctc atatccggct accagaacga aggattcttc gaaacccagg
    18841 tgatgctgtg ggccccggga acacctttgc acattacgct gcgttcattt tctccaaatc
    18901 tgatcctgcc tcaaagcaca aaaagacgta atcgcaaagc tgtctgagaa tgggcatttt
    18961 attggcaacc tgaaactccc cagagaaaat tttttacatc acgacgcgat cgctgactcg
    19021 cctttggctt ctatatccaa agactcagcg actcccggct cagagacggt gttttcatca
    19081 gtttccccgt cttgacgtat cctcagaacc atctgttcaa ttatatcatc tttttcttca
    19141 ggtgtctcaa ccttcattaa ttgcgcagga ataaaacttc catcctgacc gactttgaat
    19201 tctgaggttt ccgtctcgcc tgccttcact ttttcaagag cgagatctat ttcttgttct
    19261 ccgttacccg gaagcttcaa gtctaacgcg tccttaaatg acgcggaatc taactcgcga
    19321 gacaaatcag catccggtag cctaaacggg gactgaacgg aatcgagatc gttttgcaac
    19381 ctaaaatctt taaacatatc tcgaggatta ctagcttcaa gaattttttc tacgttagct
    19441 tcctccgatt cgcgtcccga cttgttttct gtagccaact ttaaatcggt cccgcgctga
    19501 ttctgcaaaa tgtcttcgat gcccttctcg cctaaactaa tcagatttgt aaattgactt
    19561 agaagattgt taactcgctg cccgagaccc gcttgaatat attgttcatc tccggcattt
    19621 ctagcatctc ccattaaact acgtgatggc tcttgcccgt ttcgcgtcat ttctttatcg
    19681 acattaaact ttcccgacat ttcttttttt tttgcattgc cgccaaaatg caagaagtcc
    19741 ttgctatttc ctttcccccc tcttaatacg tcacgatcat ttttcttatt taacccggga
    19801 aaaaaaccat tcgcttgctt aatttttctc aacgccgggg aattccgagc agctacagtt
    19861 tcagtcgcat cgccagaatc tccggtcacc tcgcgtgagt gcattatagc tttatcattt
    19921 ctttccttag ttaagctttt cggaatatct gactgcttct gtttcctaaa accgtctttg
    19981 cctctcaaat ctttaatgag aaaaacatta cggggtgaca cgccggtctc cgtgctgtaa
    20041 gtcgtatgct tcgcttctga tcccgccacg tcggaattat tcaacacgaa gggtgtccct
    20101 gtctgctcag gaacaaagcg atgcaccgga tctaaaaaat ccgcattcgc cgctgtgttt
    20161 ctgctccacg gtggcaaaac ttccgattta ttctgatgca gattgagatt agctaaacca
    20221 tttaccacat cggtaatacc gctactggga ctcccgatcg aagttttatc ctgtagtaaa
    20281 tccacgccgt tcgtattcaa ttgcgcatta ggtggaaatt taacattaaa atctaaaatc
    20341 cccgaagggc caattttata aataccgtgc gacttatctc gcagatccag attagtagaa
    20401 gtgaaagacg acaacggcag atccaggttg gtagaagtga aagacgacgg cgactcaact
    20461 ccggacatta aagagacaga cgaagcaggc gttgttgctt taacttcttc acccccgagt
    20521 gttgcttcct ttattaaaat ttttcccccg gcattatcaa cgctatccaa ctctagaaat
    20581 ttcggttgtc tctgcattct taagaaagta tccaaacatc tggatttact ttttttcaga
    20641 cgagccggat ctacagatga tttctttgta tctatagaca tactaggtaa agtcaaattt
    20701 gaaggtatat cgctgtgtaa agggacgaaa tccattaaag agtgaggccc aatctcagac
    20761 atcgaaaatg ctttcgacgc gctgtgtgat tccagactac ttttgataat atcataatca
    20821 ctggtgatta ttttcagaaa actctctact ctttgaccag tcagaggagt ctgcaaaacc
    20881 ctatgagaat atacaatatt aaaattgtcg tgcctcctca aatgacccga gagatgattt
    20941 tgcgtgatta caatttgact catagcaacc ttttctagct ttgaccagga ctgagttaac
    21001 gctaaaaata acttaccgag ataaattaat ttattaatac tcgttattaa gtaaccgttt
    21061 tcgtcccagg ggtcatttat gttatagacg gtataccaca gcatgttgtt ttcagcatct
    21121 tgcaaattat tttctatctc gctgctgtct tctgcagtaa gatttacata aggagtatcg
    21181 atcgcaacat tgctacccca cttaatagag tttcctaaac acagtaaagc gcgattaaaa
    21241 tcactgaatt gcgattcaaa cttttctttg ttcgtgaaca tattttcaaa aattccttta
    21301 ttcagacctt tggattttaa gtactcgttt acgacacttt ggagtttcgt gatgtcttgc
    21361 catatagcat cataatccgg cttcctttta gataagacgt agtgatacat aagccataac
    21421 actagtaggt tatacaatgt ttttaaatcg tctacatctt ctccctctct cacgacacaa
    21481 gaattagtca catggggatg ctctcgcaaa tctacattat ccagtctttc caaattgctg
    21541 agaaaatttg taagatactc aactttgtct cgatctagcc acgcaaacgg aatcggatgt
    21601 ctttgcagat ccatatttta gaaaacaaac tcaaaaacag aactgctcat ttccgccaac
    21661 attcaatgtt taatagtctt ttttttaccc acacagaaaa ctgacaagcg acgagatgga
    21721 cactgtcatt gagctgtcca aacttctggt aagtctccag acatcgttgt taccgaatat
    21781 tttaatgtag cgtaacataa aaataacatt caatatcttt aatagcgcaa tgaagagttc
    21841 aaaggcaatg cttcctgtac ctcgacaccc acgctaaaga cagcacgaat catggagagc
    21901 gcagttaccg gaatcacgct caccacatct atccccatga tcattatagt ggttaccacc
    21961 atgattctct accacagagt cgcaaaacat aacgctactt cattttacgt catcacactc
    22021 tttgctagcg attttgtgct catgtggtgt gtctttttta tgacagtgaa cagaaagcaa
    22081 ctgttctcat tcaaccgttt tttctgtcag ttagtttact tcatctatca tgcagtctgt
    22141 tcatatagca taagcatgct agctataatc gcaactatca ggtacaaaac cttacaccgg
    22201 cgtaaaaaga ccgaaagtaa aacatctagc acggggcgaa acataggaat tctcctacta
    22261 gcttcctcaa tgtgcgcgat tcccaccgct ctctttgtga agactaacgg aatgaaaaaa
    22321 acgggaaaat gcgtcgttta tatatcctca aagaaagctt acgaactgtt tctagcggtg
    22381 aaaattgtct tcagcttcat ttggggagtc cttccaacca tggtgttcag cttcttctac
    22441 gttatatttt gcaaagcttt gcacgacgtc accgagaaga aatacaaaaa gactctattt
    22501 tttattagaa tccttctcct gtcattttta ctcatacaga tcccctatat agctatcctt
    22561 atatgtgaaa tcgcatttct ctacataccg cagaacacct gcttttggtt agcccgtgta
    22621 gagatactgc agttaatcat tcgattaatg ccacaggtac attgtttctc taacccgtta
    22681 gtctacgcat tcactggagg cgaactcaga aaccgattta ccgcctgttt tcaatcattt
    22741 tttcccaaaa cattatgtag cacacagaaa cgcaaggagt cagacgtatc cgaacatgat
    22801 cagaactcaa aatcgaaagc gtcagtggaa aaaaaccaac ccctttaaac acgttttaca
    22861 aatttttaac taataaatgc tacccacatg aaatcacgta ctatcttttt ctgtgtttta
    22921 tcttccatag agcatggcgc acgctaaaaa acgggtacga cgaaaacttt taacttcgac
    22981 agacgacccc atattgtcca acacttttac catgcgcccg acaagtaaga ttgcagacgc
    23041 tgaaatcatt tcaagagaac atgattatat cgcaagcaaa acacagacgg attcaaaaaa
    23101 aatatcgccc ctgtctgtga ttttagacaa aactgccctc tttgaatttt acggtatagg
    23161 agacaacaac gaaaaagcta tcgtctaccc tatcgatcca gatttcttat tatgtgactc
    23221 ggaacataat tgcaccctat cacctttctt ataaaaattt ttttcatgat ctcacgtcac
    23281 agtttttttt tcatatgtct cgcgttgata catcccgtat gaaatattta aggtggttga
    23341 aatcacacca atggtcacac acgcgatgga agaaccaaag acattcaaca ttccaacttt
    23401 cgtcttagac gaaaattgta acttcatacc cgaagttctc tcacgcgcca acgctaaata
    23461 tatcaaagat gtactcatcc aagactccta caatacggtt tgtctcgcaa acagctttat
    23521 tcccatgacg attcaaacca cagagcaaat tatggttatc atcacaaagt ttaagttttc
    23581 acgtgcacga gatctgttcg aaaaagtact ccgcctcggc gtacatataa acagatttta
    23641 tgccggaaaa aaacaagtca aacatatgat tacaatgatg aaaagtcttt tcgacaccga
    23701 agaagccatg cgacgtctcg acagagctct tatggggctg tttgtcgatg ctcgtggtag
    23761 ttcatatatg cctctcatag ccttgtcctt gcacgaaaac ggccttccag attccaaatt
    23821 cgcaaaagcc gtcaaattaa taaacacaac cttaaactcc tttcataatc gaccggacgc
    23881 agatatcgaa cagtatgcac aaaaattacg agcatacaat tacctctata aaatacccca
    23941 ttatactttg aaagaagctg ttgacgttta ttccgaaaat cttaaagatc tctctattgg
    24001 agttaataaa aagcccacat tactgtttac ttcttcagac gacgggtatt tatctcatat
    24061 ttttaacgac atgctattct taacttctac ttggaatatg atttataact ccaaagtaca
    24121 aatcaggcgt ttgaccactt ggatcaaata cgaaatcaac tccatattag aagattgcgt
    24181 attggtggga ttccaacttc cagatctaaa ggacacaata ctagatctag cggcactcac
    24241 atcaaatatg aatctcgtcg acccagataa agaccttttt tctcactaca agctcatact
    24301 ggaaaaactt tttgaaatct ctattttcgc gactaaggca aacatttgca ttttaccaac
    24361 cttcataaag agtcacctaa tagagttcga ggatgtctta aaaagaagca atgatgatga
    24421 agacctcaat tatctgcttc tgaaatctaa cgattctgat gatgaatacg acgaagacaa
    24481 actaccaata caagtcgatc caggcagagt agacaacgtg cttacagatt ctaacttttt
    24541 taacgtaacc gcagataatg ctttctcgtc tatagcgatc atgccaattt cttatgataa
    24601 gatcatagat gtggaagaaa atgtaattca agtcctagaa gttgagatgc agagcctctc
    24661 agcagttgtc tacggagcag ttgcaaacaa atacggctta agcctaccac aagtcatcaa
    24721 aaggttaaat caaaatgaag gacgggcctc ttctcgtgca tcctccagcc acagtacttc
    24781 taccatccca tactcccccc cgcaaagcgg tcgctccact ccaacttcta tcctaaggca
    24841 aagagcacca atacgttcca acagcagatc atcatcggtc tctttctcac aagacgacga
    24901 taatcgtagt cattactctg acgaaacaaa tatcagtgat tattcatatc ccatggcaga
    24961 tctagattta gaagacgaag aacccatgga ggaccatcca cactcccctc aatcagcatc
    25021 atctaacaac tccatgtctc gtcgaagccg agctctacaa aacgaacaaa gaagacgtac
    25081 gcccacaatg gccccaccat ctccggcaag aggacaaaat aatgcccgcc tcagacgcag
    25141 aaccagacgc tcaacggaaa cgaacgacga aaggttataa tcacaaataa ttttattaac
    25201 tgtaaaaagt gctttatcta gccaattcat tgtacgataa taaaagttcc attgtttgat
    25261 tgatttccgt attcttgagc ttgtagatca tatccaataa aatatcccgc gttaggtgta
    25321 aatcatcaac gtaagaaaaa aagcgaatag cattcttttc ttcatcatca ccaagtctaa
    25381 ggtgactctt ctctaaaaac taaaaaaaaa cacaaaccat caattttatc catccaatcc
    25441 aagataactt tacattaaac actaaattac caccataaaa gtatagccta gcaacctaat
    25501 ggaccaagca cctaattaca atttatcttg aaatctaccg tacaaaatca aactcaccgc
    25561 atatatcata ttgaggaaaa gctgtttttc ttgtctactg gttaacatat acaacaacac
    25621 aattaacttc ctgtaaaaga aaaacacatt aatcggcata cattagcccg ctcgcttcta
    25681 cgtatactta aatcagtacc caccttttta taggaatatg ggtgaactga gctacgacca
    25741 tacagtcgtt gactttccgg atgttcaatc taaaaaattg atcaatatct tcccatcttt
    25801 ttaaaataaa taacatttca ataactacgg attttgtaac cgtcatactc aacgtaagag
    25861 ccggtaaaag aaatctatac atagtataaa agtccatttt aaatagatat ttaacgtata
    25921 cgatttcgat ttttgacaac atattcgaca gtgacattaa tacaggcaaa ggacacaatt
    25981 cacggcattc ttgaagccgt tgacgcttcc acacatccat cttcgtcaca gccaaagctc
    26041 tgttccgctc agcacggcag ctctccgtat tataaaaaca gatactgaat cacacgcttt
    26101 aagaattaag aatcattggc tacttgccca tcccttagaa catctcatca taacacatac
    26161 aatggtacaa aacaggattt aaaaactaca acgacaaata ttatcatcgg ctaaaatttt
    26221 tattctgtat actaacatct ccatacatca agttaaatac aactcaaagt atgacgtatc
    26281 tatttactcg tcatcctcag atgataaatc ataattgtaa ttattcgaga atgtgggccc
    26341 tagagaagta tggggacaca acggcaaaat ttcttggacg gtgctaatgt tcctatggaa
    26401 aaacttatag cgacgatatc ccctaacaat cccttgtctt aaaaaagatt caaaatcgtc
    26461 tgctatttta acacacgatc caattcccgt tccgatcgta tcaataccat aaattgcccc
    26521 cgataaatcc atcatcacaa acatcgtttt aggatacagt aatgtttttc caatacttcc
    26581 gataacctgc ccgtgatacg gcatactctc gtagacatcc gaaaagaaat tccattccat
    26641 cctactagga aaatcttctt tcctagtaag aaataaaaca aatactccat cgttattttc
    26701 caagcaagac ttcataatgt aatgcctccc actattttta taaacgatag tagcgaattt
    26761 ccataaatta tcctgcgcat caatcaacga ttgaagaaca tcatcaattt tcgttaaaaa
    26821 gcgaatgtcc ttttctcgat ataccggatc atagcgacgc aatccgagaa ctgcaaatcg
    26881 ttccgtcgtt tccgccaaca gatacagtgt ctcattcaca aaatcgagac cgtaaaattt
    26941 ttcgtcttct cccgcaaaca ccaacgtttt agttaggcac acatcacgag tctcctctcc
    27001 ccagacggaa acatatccaa gtagttgcaa tctttccggg cagcaaagta ataacgaacc
    27061 ttatttaaaa agaaataact ttattttcac cacaaaaacg agaatgacac atcacagaac
    27121 tgacacgaaa cactgatact tacacatttc ttgcaactct gcggcagact ttgtgggaaa
    27181 tggaatttta cacagtgtcg aaatcaccaa gcatcgactt ttcggccaat taaactgtat
    27241 agttaagccg gtcttctgtt ctacgtatgt cgatagagaa tcacgaaaaa ctgcaatttt
    27301 tatatcgttt agattcatca gtgcaatatc ataacgagtt ttaacagaat cgccggttcg
    27361 ttcgtctgcc atatctacgt tatggaaccg tcaactgccc ctttgaaccc gaaactacaa
    27421 ataaaccagc tcgcatttct tatccatctt ttatatcaca cagaaataaa aaactcaact
    27481 taatcaacta ccatccaaaa acaagaaatg tcatagtgtt gaactggaac taccatctcg
    27541 tccacccatg gaaaaaacaa agacaaccga acaattccct gcgttaataa tatccattct
    27601 tatgtatgta aaataataca atgtaaacaa taatgattca acaatatcct tagtttattc
    27661 tcatagaact gatttcccgt aaaggaaacg aatgataaaa accaccgttg cggaaaattc
    27721 aaatactcgt catatgcaaa aattccctaa aatcttatat ataagaaagc cacaaaccct
    27781 caaaacctca tacataccaa actttccgaa gatcaaaaag agcagcaaat cgctgccacc
    27841 attacaacca tgatcgcctt aaacatcaac tttttcttca tctattccaa cggaaggaac
    27901 aatccagaga ttacctctca agatagacag atccataagc ggcagccatc gaatgatacc
    27961 gacattgaaa tggtaagaaa tattgaaaac gtatatacaa atttaccgat agaaacgcga
    28021 tatttattta agcactgtta aatcatttcc ataggcagac ttcttacctg aaaactacag
    28081 tagtcggatc cgtaattccc atcgacaaaa caaaatagta agtactttta tcgtttcgtt
    28141 atacactaat gcccagaaga gctcagattt tgaccgatct gcacattacg aacaccccag
    28201 ggtatttaca cccgtttgaa attttttata ggtcccacta attcatattc taacgacact
    28261 gggaatgaac gctatccgcg cttctctatc aaatacgcat tgacgcaggt gagtaagtct
    28321 tttcactaat ccattttaaa tccgacaaaa aaaaaacaac aacattgact atatgtaatg
    28381 aatatttttt atttccgaaa aaaaaaacaa caacattgac tatatgtaat gaatattttt
    28441 tatttccgca gatatgattt aatccaacga ccactacacg ttttactgtc cacgaccacc
    28501 ttttccattg ttttaatgta attattttaa taaactttaa tatcctaaat ctttcacaat
    28561 atgtttccgc gtaatcattg acaaacagca tagcaataac agcatcgtaa atgcgccccc
    28621 ggccaaaaag aacaacccag cagccgacat tgaatacgta atttcagata aattctcgta
    28681 atcgcttgaa aaatccaaaa acgcttcgat ctccttatat ttataccaat taccccatgc
    28741 agacctccat gtatttctta agaatttttt cggcttcgta tcatttttga ttaatgaaaa
    28801 atttttcgga tgcgcaacct ttttcttgta aatttcagac gacaactgag gacagatcct
    28861 gctcagaaaa tagctatcca aagacactct ctcatttaaa atgttcaaag tgccattggc
    28921 atccttcccg tcacttatcc atcgactcgc attgatttca gtgctggaat tgagaacaat
    28981 ccgttccgtt ccataaaata gagtcatcac acctcctgcg ctatggtcat ctagccagca
    29041 atttacagta ctcgataaat gagcggcatt tggaagcctt ttagcgatca aagctctaag
    29101 catcactcct ctaaaataat aattaataat cacacgcaga aaagccgttt tttcagagat
    29161 agatgtaata tttccaactc tcatgtcttt aaagccattt gttaacatcg caaggttgat
    29221 cagatatgaa gttttgacag aaacacagct agaattccca gctaacactc cattcacatg
    29281 acaagtagag atgcatatag atctaagttt atgttcctga attaagacta ttttttgctc
    29341 gcatgtgaaa ttcgatgtaa agcagactcc cattacgaag atataaacta ccaaggactc
    29401 catagttaac ttcttcatga catttagtat ttacaaatcg tttgcaattt cttccaaaaa
    29461 atctgccgcg tctctgtgga atacaacaaa acaaacaaat tttaaaatgt agaaaacaac
    29521 aaacccattt aagacacggt aacgcaattc agtcatctat aacccacttt cgtgcactct
    29581 tgtaccagca attgccacat gcatcaagcg aaaacatcca ccatccctaa aattaccgtt
    29641 tgcgcgcacg ctctctccat acgtgaaaca attaaaagac ctacctcagc acagctgccg
    29701 attcctgaac atcattttct gggctcttaa gccaatgaat gttcggtttg cattctgatg
    29761 gagtagcaat gatacaataa ccttttaaag gtttttcttg cgccaaagac gcaccgccct
    29821 gaacattttc actacctaca tcatcggttg ccatagcacc gaacactgtc gtatcgtaca
    29881 ccgagtcgat tcgaggatca gagacatcaa aagtattttt tgcggtcgtt ttgacttccg
    29941 tttccaaaat tgactgatgg accaaatttt caccgagtaa cagagtttct gaagaattat
    30001 ccaccacgtc tccggtttgg gtggcagcgt tacacatcac ctcagaccga tctgtctgtg
    30061 tatgcctcga gaacataatt tttataccac gagttttggt cagtccatag attgtgcaat
    30121 gtcgagcgga gttgtctttt tgacacgata aagccataca caccttgccc ccaacatctt
    30181 tattcgcaga tggctgcagc aattcttcag tcggccgaca aaatgtatcc ttaacaccaa
    30241 aagagtcaca ctgaattggt ctcatggaag cacgagcatc ttcttccaca caatcaccgc
    30301 tctctacctt ctgaaaccgt ctaggcaata cacctgtcaa aaaaattggg gtatgtctca
    30361 ttctcgtaaa atatttttga aattgatcac tgtattcatc gcgggacttc tgtgcgataa
    30421 aattactcaa gatcgcgttc tgacacgaga actccatggc agttgtccaa aaatctgaaa
    30481 acgtaggtga caaataaaat accacaccat cttcatatcc aagcacttga ccagttgacg
    30541 ataacaaaaa aacaacctgt ctctctggag ccgcagacgc accttcccat tcttccgtta
    30601 caccaaacat acttatccta ccctcaaaag gatacaaccc gtttattaat aaacatctca
    30661 actgacggtc agacaagata tcggaattgt cacaaatccg aactttaata caagtgatat
    30721 gttgaagaac tattccggaa gccatagcct cctgtacaac tttctcaaat ttcagagcga
    30781 accccgccga agaaatcatc ttatccttaa actgcaacat gcgcgccagt tcatcaccgg
    30841 tgaatgccat tacgatgttt ttctcgttaa tgattattgt aaccggccat ccaaaaatgt
    30901 aataactgca caatcttagt taaatttata cgaaaaaaac acactgcaac tccggaaatg
    30961 ggtgtggcat aattttaaaa gcaccttacg aaaaaaaaac agacactgtt aacaaaaaac
    31021 caatttatta aaaaaatctc tattcaaata acctcacagt catggaaata ttttccaaag
    31081 gtaaaatttc taacttcaca ttgctaaaaa tttcgtgaga ttttagactg tcgttctata
    31141 tcaaacgaat tatttccgca gacaaccgct atcgaattgt cacggacctt ttgaacgcta
    31201 tggagttcca tgtaatcatc agcttcgtaa ttgcagtatt ccacttccat aatcaccata
    31261 ggcacttcat catttctcct acgccttttt agcactctat ttggattcaa tgaacatccc
    31321 ccagaaacaa aaaacagaat ataccgcgtt aacatatata caaacataca cccagcagca
    31381 attggtatca cagcaaaaat ccacagcagc tgcaatttat taaattgttt tctgtgcggt
    31441 gctggaaaat tatgacgtgg aaacatgtct tcggattgct tcacgggatt cacaaaacct
    31501 ttaaaactat aagcatcttc tcttgttaag agagctgggg taactaataa tttatgcgta
    31561 atttcacatg aaaaattacg ttgtgtcatg ctcaaagctc tactcaatgc tctttcataa
    31621 gagtatagaa gttgaccggc aatttcggtt ctaatgaaat cgtcagtcat atgatcatct
    31681 gagactgtct gattttgaag actccattga atattcgttc caatgggccg atatcgccga
    31741 gctgtacaaa cgagcaaacc tgtatctctc ttgctgaaaa cttgcggagg acgatgtcta
    31801 tagtctccga aaacaacctt accatagaaa tttaagatgt cttctacaca aaaacgtctt
    31861 gcataaaacg acaatacgtg caaagaccga ttttgtaaaa aactgctcaa atttataaga
    31921 tcgtgaacaa aaccacgatt ttcattaaac agatctatct gtacataggt tgtattaccc
    31981 gctaaaaaaa cgtagctgcc agacaactgc gtattattgt taacgaagca aaccaattcg
    32041 cttacagaaa aattttgaag agagacatat tgaagcccag cgtgcagtct atgaaattca
    32101 cgtatcacca catgtcctaa gaaacggtct acggtagaat tttttccttc ttccaagttc
    32161 cccgtaaggt caaacaacgt ctctgcaaca accgtatggt tcagcaatgt caaatcttca
    32221 tagagcctct cgtaagcaaa aactatatca ttatcaatgc caataacggt ctgaagttta
    32281 ccgattcctt cagccagagt agtcttgatg taaagtttag ccggcaacga agaaacgcat
    32341 tgaaataagc atgcgacaaa gacagttatc atttttaaat ttttaattca cgtcgaagaa
    32401 aggtacggcc cttgaagaaa caattaaccg ccgtagtcaa taacgtatca caaaaaggcc
    32461 acatgtagtc aacactaaca aagataaagt atattatttc cttcaatcct acaaaacagg
    32521 aaatacccag gagacccaca gaaaccgcca ccgcacccat gaacataagg tttaatatga
    32581 tagatgtcat ctctgcaaat gataacatag ccgaaccttc gtcataaatc tgaatagact
    32641 tttcaacatt cttctccgga agcgtaacga taacattatc gccactctcc ttgttcgtgc
    32701 acatgcagaa atatttatcc cctacccatt tatccaatgg aataagtccc cacgtcacat
    32761 cgttgcgaaa taaagacgta tatgcaccgg acgatctcat ctttaccgtt ttccatacca
    32821 tatcaaacgt cagtggcttc tccgcaaaga tttcgatctt tcccagcctg ctgacacccc
    32881 aacctgaata ttcacaaact gcaaactccc cttctgcgcc cagccaccta gagaacgaac
    32941 atttcaaatc atcagctctg aacaatcttt ctgaagaaga tctgataacc ggcataaaat
    33001 ttaggttcaa cttctcgtcg taaggcagag ctatttgtct aaattcaccg tacaactcag
    33061 ataggatttt aacatcgttg ttgcacgaag atatcaagta ctgttgatat gtcgagagtt
    33121 cagcccaaag acgtaacatc gtcctgtctt caccctgaaa attcttatct gcaatccaag
    33181 agttattgtt ccgatcaaga aaaaaagcaa cacgtagtac ttgtttcttg agatttgctg
    33241 cactcattct actcagtcgt atcgattttt tattaacaga gcattggact tgaatgctaa
    33301 taaatgtcat tgttccatga ccacatttct gaacacgctt tcttgcaaga tgcatagttg
    33361 cactactcac ggtattaaac aatagtttat gtacgttatt aaaaacttga aaacatcgaa
    33421 aaaccaaaaa ctttccgaaa tcataatcaa tttgactgtc ttccattcct ccgtaaaaca
    33481 cttggttatt gaccgccgca ctaccccaca actccatttt accgcttctt tgatttctgt
    33541 atgcagatat ctctaacagc aactccccag ctctaaccgc ttcatcgttc cctacgccag
    33601 gagccgggca agtgggagga tagatttcac cccgggctaa cgtcaagacg cataagaaaa
    33661 caaggcagat catcatgctg ggttttcctt ctcttttgtg atcactagcg tccactaagt
    33721 ccagcgaggc gatctttaat ataagatcgc cgtcatacca caacgtcgaa gggttacgcc
    33781 cacatattaa acaacggatc caaagcaaac cagcaagaac aaagaaccac aacagcaaaa
    33841 aggtaaaccg agatacagta ataaacaaag cgctcacagc gggataaaaa gcgtcgtctc
    33901 tcttttcggc agaatgctac agaaatgaag caatcacccc tctctgtagt ttttctagcg
    33961 taatccacca catacgtttt aattctaatt gactccatca ccgattgatt tagtaattgt
    34021 aactgcacac cgctcggaaa ggaaacatta cacttagtat cattgtccac gaacacaaca
    34081 ccaatatttt tattgtatcg acataatatc ttagacccca tggcggtctc gataacgcat
    34141 cgagggttaa acaaaaaggc tatatctctt tcgaaataag cattaatagg cacactagcc
    34201 atccgccacc aagcagttcc gtttctctga gccattttta caaaaatcaa ccaatgcctt
    34261 aactccgttt cactgtgtgt tgcgataaaa actgaatttt cattgttaat aatatgcaaa
    34321 gacgctatca ccgacacgta taatgcactc acccatacta aactacaacc ctgaggcacc
    34381 ataatcacta ataacaatct atgagaacct catctgcaag tctttgcatc cctcctcatt
    34441 tgtacatccg gttttttctc ttcatcccaa aacaaagacc tctgcttgtc tttcttatac
    34501 caattacaca aaatgactat cagaattacg aacgccccga taaaactaat cccgccgatc
    34561 caaattacta atgaacttag aaaatcttta aaatactcct catctccctc atgtgtatct
    34621 gtaaactgaa ggacttgaac agtatcagtt tcccaaagag cctgaaccgt ctttttcggt
    34681 gtggatttcg tcggcaaacc ctgaggcgtc ttttcagaca catcggaaaa tgtcgacgcc
    34741 gatattactg tgaaagacgt ctcaatgttc tgcgtctcat cacccttgac cgtcggaaac
    34801 gaacttgtaa catttacatt attgccgacg gatcgatctg tggtttccac ggctagcgta
    34861 gaggtcacca tagaagactg atttaaatat gtctcagagt ctatagatat ttcggtaaca
    34921 tttttacccc acgtttcaga attcgccgaa aacgtggttt cggatttccc agttaaatag
    34981 tcgctggatg tcgatacatc cgtttccatg tttttagacg caattgatgc aaattcagtt
    35041 gccgaaactt ctgtagtcat taggttgagc attcgcacct cttcacaaag acacacgagt
    35101 aaaaaagaca agaacaacat gtttttgcga ttgcccaagt gcagcgtttt taatcacacc
    35161 cacaccaaga tagcagaata aaaacaatct ttagaacaat gtcccgaatt agtttttata
    35221 atacaactcg acgaattcaa attaaaaaca caaatgtcga tcataagaaa acacgatttt
    35281 gcaataaatt cagatttcct catacgttca aattcgctat gttagtttaa tagtcaatgc
    35341 ctgctattcc ttttaaccaa tagagatttt tcaatgttca tgtttccgct ccacatcgca
    35401 tcagcaaatg tttctaaaac aggtaattca tcgcgttcga cgattcacat ggaaaacgta
    35461 aagaacaaag acaataaaca aaatcattgc gatagccaag cccgtcaaaa ctaaaaaaga
    35521 aaacgtcttt cgtctattgt tccacaaatt ccacgccggg cgagactgcg gaggcggtat
    35581 gcattcaaca aacgatgtat cattgctaac gtgcggagaa acctgtccac acatgacgtc
    35641 catcatcagt acctctgaat aggacggcgg cggcgtccga gggggatcca tcctcttcac
    35701 gacgaagatt cacgttgaaa tacaaggcga agataaaatt tctccaaacg gacttaaatt
    35761 actaagaaaa tcggagtaaa cgagaaatgc gagcacgaat gcaactacga gaatgtatgt
    35821 tccttcccag aattcatcgg cacctctagg aatggggaat agagttttgc ttataagcaa
    35881 catggtagaa gaatacaacc taccctcttt caatacaatt aacccccctg actagagacg
    35941 tacatatctt taataatcct cgctctcgac gcgacctctg acagtgctca cggagaggac
    36001 agaggacgtc tctagaaaac atctcatcca cctgcttaat atagtccgta tcttgcgtaa
    36061 accattgcgt atgcaaccga cgattctcat tataacgcag acatccaatt tttaaaaaat
    36121 cggacatgtt gcgagctatg aagagaaggc tctcctcacg gtcgacgcaa aaaagcatac
    36181 cgtggccgtc aaacactact acgagctccc tccagtcacc gaaaaaatta tgctgtacaa
    36241 taaacactac atctagtaga ctcgtctgca gtttccttcg ccactgaatc aaatgtctac
    36301 tagaaaactc agtcatgctc agattgcaaa agcgaacaaa ggtcttgtac ggatatgttt
    36361 tcaaggtaaa aaaagcattc ttcctttcat ttcggtaatg taagagctca gaaaacgatt
    36421 tactgtgagc aatcatatcc agcgccacag tactgtccag tgcataatca cacgtctcat
    36481 aaatcggata aaaaaaccgc aaaccattag aaaacaaatc gtgaaaagaa gaagccacgt
    36541 gataaagact tctgtcaaaa aaaccattat acacatagat gtgcccccgc gccccctgaa
    36601 ggacaatcgg tcccctgcag gttctcgttt ttgccttatg tataacccca accacaacca
    36661 attcgcctcc gcaacacata taggtcttcg cccaattttg aacatcttca cgtgaaattt
    36721 ccgggatgtt ttctacacta tgcagagtca atcgataatc ctcgggccag ggtaaagcta
    36781 acgtggcgcc ctggcgattt tcgataaaat ttaccagcaa atcgatgtct ttgcttgaag
    36841 ataaacccat aacgatgaac tgcccggctc agggcaaata aacacaaatt gggaaaacat
    36901 taatactgca aaaaatttta ttggtgttca ccaaaacagg cacgataaat tgtctaatca
    36961 cacaccaaaa tacatgcaac acacgactaa acaaaaaaaa ccgttcaata aatcacccgc
    37021 atagaaagat ctgtctttca gatcgctgct taaattcaac ataatcgaac taaacccgag
    37081 acctacaaag gcttcaaaga taattcgata taggcagacg ttcatcataa gtcccgataa
    37141 gatcgccacc accgcgcacg cagcggcttt gaatacgttt agtttaaaaa atacgttgtt
    37201 gaccacagtc aggaaaaaaa gatggttaga ttttggcata ctcaagaaca tttttccgat
    37261 ccagagtatc gtaaataata acaaaaattc gaccgtaaac tttacaaggc atttcaaatc
    37321 aacttcacga aacgacgttg acttcaaaat cggacgatat ttttgcaaac caagaaggaa
    37381 tccagacgat cgtatcatcc atccatatct cacagtaatc ggcaggagag acgcagccgt
    37441 tatcaagaca gaataatcat cgaacatttg actcttaaaa aacaaagaca ccatgattcc
    37501 cgtaaacaca gctggggaat aagacggcat aatcatgaca caacgactta aaatcattct
    37561 caacctcatc tcggaaaata tcaagcagat catgaccact gcagacaata atgatggcag
    37621 tttcggcgcc attaaagaca gaaacacaat cttgaaatca cctatgggtt tataaaagcg
    37681 tggatcaaat cttttaaaag tcaacaaaaa ggaaatcgca acggttatca aaacgccgat
    37741 ctgtccgagg ggggacctcc cctctgtcat tctaaacgta tacaaccccg gaataacggc
    37801 acccttagca agaccgagaa taaaactatc tgtcagacga cgcatctctg cctcttggga
    37861 ttgggattag agctgtagtc aaaatgcatg gaatcgtcac tttcgctatc ttccttctcg
    37921 ttaaataagc tagagcccgc agttccgttt ttagcgggga ccatgtagtt ggttatttta
    37981 tattgcattt cctgttttga tgccaacgca cttccgtctt cgttcttatg actcctatcc
    38041 ccttttccgt catcttgttt acccattcgt tcaaagcgag attcctcttt gagctgttcc
    38101 tgagttaaaa aggcttccac cgtcaacaac gtgcttttgg aagttaatat caatttacag
    38161 tccttagcgg ctaccgtacg taaactacac gacgtcttga ttacagcaca catacttaaa
    38221 gcctgctgta aatttttggc agatagatta aaccgcatgt tcttaacatc gtaaaatata
    38281 accttattgc tgttcgaaaa ctccagttca ttcatctctg tcacgaattt tatagtcgga
    38341 ggattaacct gtactataat gtgcgccatt aaagcgtcag atttaccaga gcgtttagtc
    38401 ttagttacag gtgaaagcca tttcaacaca tcggaaacgg tcgaatgatc aaggtcaatc
    38461 ctcaacggcg atctcccggt gtctcgcacc acttcttgtc cgtgcacaca gggaaccgac
    38521 gcctgtgtac atgtatcgga agccgttacc aaaaccctcg tatatagatc actatcatgc
    38581 tgaatgtaca tcttcgtaac ctcaggattc gagatgatgt tcataaaact ttcaaaaagt
    38641 ggaatatgat tattaatggt tttcgttaaa aaacgatccg tatctgacaa aaacaaacat
    38701 tccgcctgaa tagtcagctt ttgcacgaga tgatttttag cagactgaat tattatcgac
    38761 ggctgcggcg tgaaagtcac tgtagcattc tcttttaaca gttttgcaaa cgctttaagc
    38821 gatttattaa tagttttcca gcttttcata tgaaaagcta gggtcggcgg ttctctcgtt
    38881 tctctatgtt cccgatgatc acggtgatca cgatgatgat ctcgactacc gcgctccatc
    38941 tctgtcaaga acgaagtcct agcaccaact cgcgccttat gtgctttaaa aaacaaatga
    39001 aatgaccaac acattatata ctgtattttt ttggcgccaa cattttatta catcactaca
    39061 aaatgttctt tacgtgcata accacaccat ccgaacattt cccgatcaac ggtaacggat
    39121 ttgataaatc aaggtgttta tacatctcag aattacacaa aaccttatac atagcgactt
    39181 taaatccggc tttatacagc aacggtagca agagtctcaa actcacagta tcgttgaaat
    39241 aaaacacatt tgcctgcccc tgatctaaaa aaggcaatcc actcttatac atctcaatca
    39301 aatcattcaa atgataacta aaaccatctt tgaaaacggc taaatcatcc aactccttgt
    39361 ccgtaaatag gttcgtgtcc acgtttaata ccctatatcc cacagtcttc aaatattgct
    39421 gatgcttgtt aaatctgttg agcaacagat tgttatacac ggggatatat aacgatttta
    39481 attccgacga ataaactgaa gtgacatcat ttaaaccgtc ttttccaatt acgactttga
    39541 tatttgaccg ccttaggatt ttattgtctt ccatcggcca gaacgattca gaagagttga
    39601 tgatatcgaa ttctttctgc atggcagtac cggcggtgaa atgaatattg cgaactccgt
    39661 acatcagcac gtctttcctc agcgttgtcc acaattcctc agggagcgtg cattcgacat
    39721 tatcaaaatg atcaaagtat aacatcccca gtgcgtattt tgacctgtca aataaattac
    39781 atggctctgc tcctttcatg caacaatcca cactcgttcg aacacaagta taataaatgt
    39841 gttcacatat catccgatat aatcgacgag catctggatg tgcataggat aacccgacag
    39901 tcatgaaaac agaatgaaga cccgtgacac agatacctag acttcgtcca tcttcgattc
    39961 cctcacacag aaaatcttta ttttctacag cataatcaat cacagcatta gcgaccaaca
    40021 ccatttttcg aaccacccgc cttaattcat taaacataaa aaatttacac tgcaaacgca
    40081 cgaaatcaat ctcctcagtt agctcatcgc ttacttcgtc acccaagaaa tgtaccacat
    40141 taagcaacat tctcaaacaa gtgttaatac cgtctctgac gggtaaaaca tccaaaaaat
    40201 cacccccgca atacaaaggc acatgaggaa tcatagaata ttgatatacg ttttttcgga
    40261 aaataagtcc catcctgccc ccttttaaac aaaggcaaat tttttctata aaactagaca
    40321 tagtaatttt cgcatgatct gttgtccgct caaactccaa atattttgtc gagaaagtta
    40381 tctcgtcaca ctttcccaat tcaaaagcta tatttttctg aaaaagagac cactgcgccc
    40441 tttttagctc gtacctatcc atgaaaatcc caggaatgat caagcaaaat gtgacccgag
    40501 aagtctgagg caaagcttca tacaagtcca gccacattag tgcagacaca tgccagactt
    40561 ccacatagac tgtcaactga accgtcttat cggtatcacg ttccaccacc cgaatttgag
    40621 acagcaatat ctcaaaaata ttcttggctt cctgttgata acgagtcaaa ttcatgctta
    40681 tattagaacc gtttaacaaa gccggaaaaa gatgttcgcc gtttactgtt gtaaaatcca
    40741 caagcgaata taaacatgta ttgtaaatcg ccacgtcaaa aaccgtgcta ttagcctttt
    40801 ccacgaggcc caaatttgtc atacaggaaa acggtaaaac ccatttttga gtaaaaaggg
    40861 aaaacgccag ttcttcgaac atcacgtaag gattctcctg atatatctcc cgcagataac
    40921 caattcttaa cacgatctct gtcaaagtag cacacatacg aagatagatg catggaatac
    40981 tctcttcgac accgtttaaa gaattggaaa tttcttctaa aaagcgagat gcggccagaa
    41041 ctccgggcat atattggttt ttccaactca cgcttacttt atagagtacg ctgcgaataa
    41101 aatctcgata cttctttaca aagttcaata catttggcat aatcacattc gggcatgata
    41161 aaattaaatc gtccggacaa aaatcgtaaa aaacactcgt cttcagatac catcttccta
    41221 gcattcgatc cactcgtgga acgcaatgtg tagctctcaa aacagaaatt atggcatccc
    41281 gcaaacacca agcatctaaa cctgagtcga gacgatcgat tatcttagcg atgtcacgaa
    41341 cccgttcata caaaacagaa gcgcatgaat attgagaata acaaaaacgt ttttgcgaag
    41401 cttcgtaatg acaaacgcat tttctgttgt agccataatc tttattaata cgacgctctt
    41461 ttctcttcat tttcaggcag aaggctcaga agctatacaa acactttttt ctcagaaagg
    41521 tcaacgaata tgttctctag ctttatcact gacagggtaa ttccacgata ctgcaggaaa
    41581 cccgatttaa tgtcctccgt cgcgcaacga ccaatacgct gaacgcttcc aaagtaactc
    41641 agcgtggtat tgctattaat aagatagttc aagaacagaa accgctcctt ttcgaaatac
    41701 tgtcgcaaga tgtcaactat cagatcttcg ttctgaaaac tagtcagaac tacgtagatc
    41761 ccatactgga gctttgctaa aacctccttg taaacatgaa ccacgtaaac atactgggtg
    41821 gaatgctgcc gcggttccca gtctggttct agtataatct cttttaatac cgtgagcccg
    41881 taaatgtttt ctttgttaac gtcatagaca tttccttgca tgacgcatga caacagacaa
    41941 ctgctgccgc aagaaactaa gctcgtcaca ccaaacaaag acactttgtc ttccaggtac
    42001 ctacacgtat tgatcatcga taacacgtta tcaaccattg agtttgtata catggcagtt
    42061 aaagcggttc tcacacaagt agacacattg aatgcgttag aacaaaggaa aaacagaccc
    42121 acaaacagaa ttttagggtt gtccacatca gtctcaaaac gatacatcaa cattcccaaa
    42181 ttttccagct ccggtgccag taattcacaa ggagtgaaaa cccttgccgc tatacgtaaa
    42241 ttctgcctgc cggacaaaaa ctgtttcaga aatttccttt ctttttctac aacattattt
    42301 aaggttccct catcgataga tatatatttt ctcttcttca cagcttccac agtatccaca
    42361 atggcagctc gtgcactcga tttagagttc atccttagtt cactcaaaaa aagcacgtct
    42421 ccagaatcat tactagccgc tacggcaaaa atcgaacttt tatccctggc agccgatagc
    42481 gtaacacaca acagagtaat agcttttatt aatcgactaa ccccgaaaaa atatcacttt
    42541 gacctcatca gacagtatgc ggtattctac tttttaaact ctacgacctt aacatcagaa
    42601 aataaattgc tctccgcaga acttttatac gaagaactca gccaaattcc ctcttcgagt
    42661 tcgtcgggca cagaacttga aaacttaaat aatgcagagg tcctttacgt gttcgatcga
    42721 atactcaatt ccattaaaat gctaaaaaat gagttatcgt ccccaatcgg caagcttcga
    42781 gcacaacccg ccgccaatga cccaggtaca gataaaacga taaaatactc caagattcag
    42841 tcgatcatac aaaagataaa cagctttaca cacgaaaatt cacttcttgc caactgccgc
    42901 gccgtcgtag agctgataga cgatctatat cggaaacttt actcatggtt tctgcacgtt
    42961 ctcactttcg aagacattca gtttccaggc gacacatttc tagacaggct gttgaaaatg
    43021 gactactgtt ttacatatta cccttcttca aatcgccatc taatagatct gttcgaaaag
    43081 acgttggaca atcaaacgtt cacgaacctc gataaatttt ttgacacctc aggaaacagc
    43141 ccagaactac tttatcaaaa aacgtttagc ttgaaaatat tttcaaaaaa tctcacagcc
    43201 caggacaatg gattatatat ctatccacta cttaaaaccg acctgtccat cctcgacttc
    43261 ctcggaaccg aaaatattct cttccatcga ggcctcatct atcacatact tcatcaaaaa
    43321 acaatccctc aagaacggga gaatgatctc aataaaatca atcaattttt cgctactgtc
    43381 atccagcagg tcatcgaaac gaaaagctca tgcttacccg catcgttatc ccaactgcta
    43441 gatacaattt ttcacttcaa cagaatcggt ttaaacatgg aaacgtgcag aacctacatc
    43501 gagatcctct caaaccacat ggcaacgcca gacacccaac ccataatcaa tacattcacc
    43561 attaacttaa cccatattgt tttcaccgcg cacgtgtttt ttatctgtat ggaaaatttt
    43621 agcccaacat tcatattcta taataggaaa aaactcatac tagaacaaca gagagccatc
    43681 ttgatcatcg aacgaaatga ttattccaca ctctggaagc aaatatctga tcacatcgac
    43741 tgtctcttca acgtctctct ctccgaatcc ttttttaaag aatataccaa aggaggaaac
    43801 gaagatcaaa aacagtttct atacaaaaac ctattcgaaa aatggggtaa cgtatttttc
    43861 cctttcacgt actcggtatc cacctcaaac aactctacgg cacaccatat tacaaccctt
    43921 gagctaaggg atatctgcaa agaggtctat cagagcgatt ccccggacgc atatgaatct
    43981 ttacttccct acagcactca tccatctttc aaaacattat tcgttaaaat ctacgttata
    44041 cctatggttt cacacattac caatcttacc tttgataaat tacaatctga ttgcagactc
    44101 ttaactctaa tccacgcctg caaactctta ctcccctcgc aacatctact actacactac
    44161 atggcgtggc tatatgcctt ctccataaac gtggaccata tagatctagg cactttcacc
    44221 gtaataaagt ccgtaatctt taaaatcgct gaccacataa acgtaatgac gcatacgatc
    44281 tactccccgg agacaaacct tctcgtaagc attctactaa acgcgtatac caactacctc
    44341 caaaaatacg taaacccttg gatcaaacaa accataacgg caaacttctc cctgatacag
    44401 acgtacataa ctttcacgaa acaatgcgcc agcatcttgg cgaccaaatg caacataaac
    44461 ttagacaatc tatttatcta cataactatc ggaacagaca aaattgtcac cacttcgttt
    44521 tgctccttca tcgctacatg cagaaattta gtacgtcaac acgaagaatt cgaaaaatca
    44581 ctacaaacga tccaaatttc cgaaaccaca ctcacgggga tgctacgaaa cataatcacg
    44641 agcgtctcct cctccaaaga gctgctaacc aacgaagcac tacaaaaatt catcgacact
    44701 gtccaacgca tctcccaaca cgtaaacgaa acataccagt ctatttccat gaacctcgaa
    44761 aaatgtaaaa cctcaaacga catcctaatc gaatccctga agaagatcat ctacatagtt
    44821 gatgtactca gctccaatgc aatcctaaac acgtcgttag cttccagatg tctggaagcc
    44881 gccaacctcg cggtttcgaa caattctttc acaatactcg aaattaaaaa ggacgcagtt
    44941 gccgttttca agccttttat aacacaacta tttggaagca tgaaacccac cacgagttta
    45001 cataagaaat tgatgtctac ccaaaaacta accaccgacc acattccatt tctcgataca
    45061 tttgacgata ggtacaacct ggtcagacac gtcgaacgac aattaaactg gtacgctgca
    45121 catgctgagg cagcgcagca agatcttatt actcctctta aattttaacg gtcgcgttct
    45181 aactcatgaa aatcattacc agtagcacaa accaaaatga ctctaaatac ggaccaagag
    45241 ccggaaaaca atgcatgtcg aacagctttt catttctcca taccgtttac ttaaacggaa
    45301 ttaacaattc tctcaatgcg ggtactatag acgccataat ggaagaaggc tatcacttag
    45361 acacggccgg caccttagcc ctaatgttaa ataactcaga ttcgcaagac tacagactcc
    45421 ccaccgagat acccaagagg atccattcta gatacggtgt cacacagcat gaactctcac
    45481 ggccatttaa cggaacccta gacacacaaa aaattgacaa tgaggtatat ctcggactca
    45541 tagatttcat actgtatggc aaaagcaaga atggtcctac ttttgcagtc atcacgatcg
    45601 gcgtgctatc gcgagcactt ttttttctta acaatactct ctacttattc gactctcacc
    45661 ctactgaacg agaagccacg gcagccatct acatctgtca aaacattgaa gaagtttatg
    45721 aactgctcac cacccacggc accgaaggct tctactacga cgccagcctc atttttttca
    45781 tagaaacctc caatttgtcg ctctctagtc acgacgccga gcttctcatc ctaaaaactt
    45841 ataaagaccc cgacatagcg attgcgctag ataaattttc ttccacggaa atccatgaga
    45901 taaaaaaaac agatgatatc ggatcgcaac aagacctcgt tgcggataaa acgacagatc
    45961 tagaacacgc gcctcataaa agaaagaaaa actctcatag tctagaacta gaactaaatg
    46021 acaaaaagaa aaaagatacc gcatccttga catattacgc aacagaagtt gacctcattc
    46081 cgagttttta tgaactacga tcacaatttc aatctttatt tcacgatctc aaatcttttc
    46141 ctataatgaa atctaatttc aactggacca tatacttaca agattctcct attaatccta
    46201 atcagccctt cgcaacaccc tttctctgga acagagtttt ccacttattg tgtcaaatta
    46261 tcgacgtgtt tgtaggcgtc ggatccacaa atgacgattc tagcaaacaa caacaacaaa
    46321 ctattttcat aaattattta ttgcctttca aggacttttc cgaagtattc aacgaggcgt
    46381 tggcagcttg tcaagaaaac aatctggaca tcatcttcat ttacaataat tacctgtgca
    46441 aaaccacgac ctttcgaaca ctcgagagaa tcttactaag taaatttctg gcaatagttg
    46501 ataatgatca caaaaaacat tatgaatggg tcaaatcgtg gaccacgcaa atgttccaag
    46561 gaatgccaaa aaaactagat gacatagaaa attatctaaa agcctacgtg gaccataacc
    46621 ctgtgaaaca ctttcatgaa ttcatttgtc tgaataaggc agaaaaatac aaagtagctg
    46681 ttctgctaaa cgaaaaacga aaagagattc aagaggctat tgaacgagaa aagaacagtt
    46741 tcgcacaact ctctaatttt attgacaaac ttggcgaaac tcccgcactt cctatagaat
    46801 cagaaaacgt gcacaaagtt cacacgagcg acatcactga aggcatcgtt ccgcgtttca
    46861 taaccgaatc gattgaacta ccaaacatct ccacgctaaa caacacccaa caaatatccc
    46921 tagataaaca actcaatgaa aaactcacca acaccattca cacgctcaca aacaaattca
    46981 ccaaaatcgt acaagataac tataacaata tcgctgccgg tttcatgccc gttaccgaac
    47041 tgaattgcct atttgcctac ctagtaaacc tttattttaa cattgaagtt ttaaaacaca
    47101 gtggcctaaa cattaacact gtgttgcttc aagaggtgga aaaactgtat gacaacacgc
    47161 aatttctacg cttcggaact tctcacttca atataaacaa cctttcaaac tttaccctat
    47221 ctatcagaaa aatgttcgta gatttctata acagtcagaa accctcggac agagcttccg
    47281 aaatcctagc cgcaatcgaa tccatcctag cggatcccag caaaaacaag acagtcgtaa
    47341 atatagaaat gatcaaatcg caacttgaag aactgggaaa aatggaaatc tccaccaccg
    47401 aaaacaaaca gacagctgca atcacaaaac aaatcctcgg ggaccaagag ttaaccccca
    47461 tttacgattt cctgcaccac ctctctgctt ataacctacc taatactaca accgtaaaaa
    47521 atttacacct ccatttcatc ttagaacaac gaccagatat cgctatgact ctacacgata
    47581 aaatacaatc catacttgac atatatgtag acgacatgct caatgacata acggtccctg
    47641 aacagacgtt ttcaaccgtt ctatttcttg tagatctctt cccaaacagc accgaaaaaa
    47701 cagcactgtt cgaatccgtt ctcacgctac ggcaattagc aaagaaatgc gctaacttaa
    47761 aaactctaga tgaattcgac gatctagccc aattcatcac gacgaatagc gaacaacttc
    47821 aaaacatgat gagacagcat tttggaaaaa aaataccaac gctgatggga catatcaaat
    47881 ttctctactc tcaaaaaata atcaccactg aagagaaaaa ctggatacag agagcaaaaa
    47941 cggtcgtcat cacatctccc gaagaactga cagccttctt agccactgca cccactaaac
    48001 acgccttaca aacttgcaaa cctgacctcg ataaagcact acaacgacat atggaagagc
    48061 aaatgaaaca aactgccgag aacgacaaaa aacacatcct cacaatcaga agcaccctcg
    48121 aaaaaagact gaacgacatc ttacttattc taaaggatgg tcaattttcg tctctggaaa
    48181 caatgcattt gaatctttta gaaacctttc tgaaacaact gcaagataac aatgtcatca
    48241 ttcactttac ccatgcacta ctgccagtgt taaaagacat agaaacgacc atcagcaaga
    48301 tcatctccga cgttattgaa aagatattaa tcaaaactcc tctaaacccc gaacagatgt
    48361 ccaaggaaga acaaaaatat acccctttac tcagtttctt atccaagttc aaaaaaacaa
    48421 cattctgcac agaagatgta aaaacagaaa tcgaccaaat gcaaaagagt atcacgttcc
    48481 tcaagaaaat tgctacctcc gccaataaac atactagact cagccactcc atctacggac
    48541 aagaattaaa cctctacgaa gaacgcatta cagagctgag aaaagagacg aacaaaatga
    48601 aagaacagct ctccaaagaa tacgcattag ctgaaaaaaa aattcttctc tcgtcacaag
    48661 atgcaaaaac tgacaaaatt tatctagttc taaatacgca cacgctgaaa gaaataaaaa
    48721 acactcaatt cagagaaaca gcattcgcta aagctctcac ggtggaagtc aacaataaag
    48781 aaaatcaact ccaggaattg ttaaaccact ttaacgcaca cctaaaggcg aaaatggatc
    48841 agaaccatat aacaaaactt tcattcgata cgaaatggac agccttcgtt tcggattcca
    48901 ggctctacat cccagacttc attaacatca aactgcaaga ctttatttct gatcccttta
    48961 aagttataag tcagctaatg aacaaagcaa ccaacgagat gccttacatt caagcagaga
    49021 taactctcaa atggttaaca aaattaatac acgacatcaa caaattctgc ctgtcagcta
    49081 taagcgaatt cggtaaagaa gcaatcccat tcaattacgc agccctacga gatttggagt
    49141 atcagatcaa caccaaatac gtagaaattg aaaacaaagt catttgcaac gaaacggtcg
    49201 aaaacacgaa aaacattcca aaactgacta agctcttgaa gcagttagat cctaaacgcg
    49261 ttgccggtgg acaggaacag tatcaaactc tcatgaacaa gattctcagt tccgaaactt
    49321 ctatgcaaca gacctacgaa aaagaacaac tcaaaaaaga atactttgag atcgtcaata
    49381 atgtcgccag cttcaagtta gcattcaact ttcctcagca actacaaaat gtggaacggc
    49441 taatagagaa gttcaaatcg ctgcccaaaa gccagccatt tgaaaaattt ccgcaggaaa
    49501 atgatctact ttctgactca ctcaacacag aaaattatat taacggtctg cgcgcactcc
    49561 tcaacttcat aacggcagcg caaaactaca tccagaacac acttctgaaa cagtgggcgg
    49621 tctttcagca acaaaatttc atcccgattg attactcagt agcgaatgtc aaacctattt
    49681 cggatttata tgcccgcctc aggattgaac gggaacgtca agtgttctac caagtaaact
    49741 ccgtctttgg aactcaccta atcgttgacg atacaggagt tccgctgcaa ttccataaca
    49801 tctttaacaa cgccatagta aagtttttct ccctgaacta caagcagatt catgtaccag
    49861 aagacacccc ccgcttggta tctagccaat ataaactcct gtccgtatgt aaatctttca
    49921 taatgatact acagcagttc tgggagaata taatcaccct ggacctaggc ccttacctca
    49981 gagacggtac acaaaatttt aaaagagaac tcataccgat cgtgaacttg aaattattta
    50041 tatactgcat aacacaagcc tggacagcct ctgaagacag tactgtttcc acagcgttcg
    50101 aattacccat caagcaattc acacttttga tactatgctc acatcctgaa tacctctacg
    50161 gctgcctcag tcattccaca gatctggtta taaattcatt agccaaaagc atagacaaaa
    50221 acagtctcta taacacattc gtcgttagcc acaaccctcc cgagaagccc atgcatttaa
    50281 tgagaaatat atgtatcgac acccagctat ggcaacccgc caaacttatg aaagatacct
    50341 tccaacaaac attttttaca caactgtgcc ccaaaaacga aaagtttttt atctatctca
    50401 ctgccttttt aattctaccc tacaaattta tgaactatat ctggattcaa tacaaaccag
    50461 ccatttttac ccaaagatct tatcaaaacc taattaagga cttatgctcc gaatacgtac
    50521 accaaaataa gatcactacg tcctcggtaa ctccccacga accagacaca ataaaatccg
    50581 gagaaaggat cacctcaaaa atcaccgtac acaaagcaca aaacacaccg acactcactc
    50641 gcctgcaggc tcaggaatat gtcttcgact acattcttta ctctttcttg acagggtatg
    50701 aaatgacatt cgctatgtac atcgatacca tcgaaaaaac atacctactt tgcatgagac
    50761 acctggaaaa cgtactccac gataaagact tccaatctgt cctcagagca cgcacattcg
    50821 acatcgacta catcctgaaa cagtcatgga ctaaaaacat agtcgaacat tcactctttt
    50881 cagtacagct cgataaaatc gtctcctacc tcaaccacac aaacagagcg acacccaata
    50941 ttcctttgat attatttaat tatgacaacg aagttgtcaa cgtttatcta ccgccgatgt
    51001 ccaccaatcc aaaaaaagta gccttttaca tcaaaaatcc tttccacttt cccgtgcaag
    51061 aatacgaagc gacaaattta atttccttcc atctctaccc aaaaacaaca gatattttaa
    51121 accaacttcc gcccaacaat actgagtcta ctcgcccggg taaacaaacc tctgaaactt
    51181 taaccaccaa aaacctctcc gaaccaaagt ttaaaaagcc tgccgttact ggacttatgc
    51241 ccaagagcca atcgatcatc ctatccactg ataccaacgt accggaaacc agtccagacg
    51301 taaaagctaa cacggccagc gcagcaataa aagatgtcac tctagctcga gaaaaaatca
    51361 acgagttctc cgaatcgata aatacaacta tttcaaaatt aaaatctatg tatctgtaac
    51421 attcaacaca cagtcatact ccttttataa atgtttatta tccaaacata cgaaataaat
    51481 gaagctttca tcaatcactc cctgtttttg tgttcagtct atgcagcgcc agcattctta
    51541 tcaaatcgag tcggaacgcc gttttatcca cgttaccgcc gttctgctta gcatattttg
    51601 gcaaaaaaac cccaagaacg ggatgactgg ccatattagg ctgcagcccc aaaacaccgg
    51661 taagcatctg ctgctttttc ttttcttctt ctttttttga agaacctgaa atctgagtga
    51721 tctgattcga caaatcatca ctacgtatgg tcgtcatttc aaatacacct cacgttttgg
    51781 gaaatctggc aaccttgaca gatattaaca cagtcttcca gatctaagca agtctctcta
    51841 aacgaatgct gacagcgctg acactgaaaa tcagaaccgt gtgaaacaag ccgtaacaac
    51901 ttcttgacgg tcacgttgta gagatgcaca gtagaataac aggatctaca cgaacaagga
    51961 acaataacat cgaacttcac attgtcattt aaaatagtgc aagcagaatt tgttccgatc
    52021 accgccttcc atgaaacggt tttcaccttc atccccaata cacaatgctc agacatctca
    52081 tatatccgct cgaacaccaa ctgctgactc ccacacagcg aacaatacat tacatccgtg
    52141 tgcatgctgt atatcaaatt tttctcctgc ttgtctctaa aatagaacat ggagctcagc
    52201 gaaaagccct gcggcgaaca cagcttttct tttccggagt ttaagcagtg accacatttt
    52261 gcgcaaataa cgcaaatgta actctcttcg agtataaagc gagaacattt agtcttacaa
    52321 tagcacataa cgggtaacga aataacactg gtagctaagc catcctttaa ggacatcgcc
    52381 aacgcaaagg ttagaatctt tggaaaatca ccccgttcag gtttgctcgg caccataggt
    52441 actagattat tatgctccac tggaataaga tatctgtctg cactaaaaca gaagttttcc
    52501 accaaagcct ttgccatagt aaacatgaaa ttccccgccg gagatttcaa agcatacttt
    52561 cgcaacatag agggaaatga caaaacgtcc tctctctgcc tatatcgcaa catcaccgtc
    52621 tcggtctgct catagtcacg taaacagaat agcctcatac acggtaagtt cacgtgcgtc
    52681 ggaatcggaa gcaacaactg ttgctcgaac aggaacatgt gcaactcatt gatttcggaa
    52741 aacgagggca tctccaacaa cttattaagc ttgtacgggg gataaaccct gaatctagtc
    52801 tcgacatcca cccatttgat tgttttaagt ttataaagag acaacaattc gagaacttta
    52861 cactgccgat acacgaaata cagataggcg agcaaaacaa aaagaccctt tgtcataacc
    52921 attttgttaa aaagtcgctt agtgattaat cgcgtctccg gcctgcaacg cagccaaatt
    52981 gcgaaaaact cattataaaa tttttccgtt acttccttat tcaagaattt tttatttgtc
    53041 aaaaacattg taagaacaca ctttcctggc acacaggcgt cacccatcac aaacaattgc
    53101 aaatgcgtgt acggcccatg tttacacaac ggagccagaa gctggcgtag gagttttttt
    53161 aagtagaaca taacaaaaat acaaggctaa aagaaagcag atgccgacaa gcgcaaaccg
    53221 acaatgcctt tcactcagtc tccaaaactt cacaccggac agtaatgact tctctttttc
    53281 atagaactgc tttatactct cctgtgatgt cacaaccgca gaagctttat ttgcaacttt
    53341 cccgctactt ccgaatcgcc ccttttccaa aacatgtgaa gaccttcttc tcaaaccttg
    53401 acaaaaccta tttgattcga gatgctgttt ccccatagaa cacttcttta agaaaattgc
    53461 cttcaaaagc gaaatgtatt cagattcgtt ttcaggtccg aacgccacaa actcaacaac
    53521 gtaagtgtcg tctcgattac gcctgattat acatttcgtg aacactgcaa aagttgaagg
    53581 cttcatagcc actatgtcgc tcatgcggac agtcaaacat tcattaacac gcaggatgtt
    53641 gcattctctc acagcatgat gaccttctac tttaaccggg gcatgcaaat aacaagacat
    53701 cgacacagct ccgcctgtgt tcttgaacac aaatctgggt tcctgcttag ttacatgttc
    53761 ccaaagactt agcagatatt ctagattata agcgtagtct aacttgagaa tgatatcaca
    53821 caaaggaaac ttcgggttct tcgacaatag attccgctca gttatcctat agtcatgaga
    53881 ccccaacttt aagatacgac aggtcgcact cagtagttca tcgtacatct ttcctttgag
    53941 tacgttagcc atttcaccta tttaaaagct attccgtatt taaatattct tgatgttcta
    54001 atattccatt tacatttaac agctttgaca atatcgaagt aagaagtacc attttttgag
    54061 ccatgacctc tctatgcacg caatcgacat ccccgtgaac gtatctagca aaagcaacgt
    54121 gtctatatcc aacactaaga aaattcagtc gcgcctccaa agaaggaagc atcatttcat
    54181 ataatcgtgg caacattgga taaaacacga cctcaaactc ccttccctgc tcacagactc
    54241 gctcatacaa aagttcaaga ttcgtctttt caggtgagga atccatcatg tacaaaggat
    54301 gggactcaga agcgttgcct atacaatctg agatactaaa cgagattctg ttatattgct
    54361 acctcactcc tcaaccaccg atcccttccg agacgacaac agccaccagc cccacaaaca
    54421 tagaaaacga aatatccaat ttagacaact ctgaaaacct agaagaatta aagcaactat
    54481 ccgtcgcatt aaatatagac agacgatgca acatctgctc catcgtaaat ctgtgcctca
    54541 aacaaaacaa atcatggatc tacgactaca gtctactgtg ctacaaatgc aactacgcgc
    54601 caaaaactcc actgtctctt ctgatcgttt ccacagaatt tttaatgtta atacgggaac
    54661 gatttccaaa catcaatttc gacggtcttt ttctaaacaa cattgtctcc atctttgact
    54721 ttcacgttca tttttttatt cacagatgct tcgcaaatac agtcaacgat cacatccaaa
    54781 acgaaaacat aaccctgaat cacatggcaa taatccgatc gaccctgcta aaagaagaca
    54841 ctataccgca catcaaaata aaaaaatttc taaccaaaaa aatgaacccg aaaaaaacac
    54901 aaagctccga actgaataaa aaactcacag tgcccatgaa gactcgcttc acgacactct
    54961 tattctatat gtggtctggc acgaacgtct tcgaccgagt tcccttcacg gacctaacta
    55021 tccgcaaaca tcgcttcatc aaaaacctgt attccaataa aaccgacatc gaactcacag
    55081 ctggtcccat tcttttggca cagattccat tttctatcac caaaaacaaa acaaccagcg
    55141 tctgtctcct atgtgaactg atggcagctt ccaaacaaga ttaccttttt ttaaaatatc
    55201 tacatcagag catcatggac tactgtcaaa acaacctaaa gatgatagat agagttcagt
    55261 tcgtcatagc cgatatcttc gagaagacaa aaatacacac gcacgtcaaa aatctttccg
    55321 actacagcaa ggcgatattc gataacgaat tctcattctc agatgataac ttcactctcg
    55381 atacccacgt ttacctgata ctccgccaga ctggaacagt gggagtctat aagcacttct
    55441 tttgtgatcc cctgtgtcta gcaaactgta aaaccatcaa cccggaggtt ctcttcaaca
    55501 ctacagacgc cggagaaatc caagacttga aagtcaccat atgctaccgt aacgaatatt
    55561 taagcatcgt cgaaaaacat gtttggctag cgatacatct tttcaaagct tttcaaatta
    55621 ttaaaccaaa ccataaaaat aaaactcaaa ttacagagtt tctcaaagac ttcactaacc
    55681 tattagcact tcaccacttc gatatcgtcg atcccatttt caccgtcaac tactacgttt
    55741 gaagaatgac tgtacacaag agccgtgttc gacgatcgcg aagcctgtcc gtgacacata
    55801 gaatacaaaa acgacctgat cacagagaaa aaacaaagct ttacttacaa ctgaaacttc
    55861 acgatctaca caccgtcttc aacatgtttc cagaatacga acaaaaattt ctagcgatca
    55921 taaaactgcc aattaccggt aaagaaccca tcgacgtccc attcagtctc agcaatcacc
    55981 accaacacac ctgcctagaa ttctccccct acgctaacga acaaatctcc aaaagcgcct
    56041 gcctacactg cgaatccgtc tccgttccaa cctcctcaga tgcaatggtc gcccacttga
    56101 accaagtcaa caacgtcatg caaaacagac tttacttcta cggttttcga aaggacatgg
    56161 agctcatacg aatgtccgcc aaacaaccca ctatctttca aatcttttat attgtccaca
    56221 acacgatcaa caacatattc cctatcatgt tcgaaagaaa acaaaagctc ggaatgcaca
    56281 tagttttcca gtctcgcact ctgcacattc cttgtgaatg cattaaacaa atagtagcgg
    56341 tatcctcggg ctacaacgtt tatctagata tactagaaga aagtgtaatc ctaactgtcc
    56401 tctgcgaaac actagatacc aatactaata tccacatcga catagggatg cttcaaaaaa
    56461 aactcgaaga aatggacatc ccaaacgaaa taagcgacag actcgaaaaa tacaaaggac
    56521 acctaatagg tttccattaa accactttat tattaacatg tacaaacgac aaaacctaaa
    56581 tacattcaca ttacctctgc aatagcagaa aatgtttcat ccaaatacac tttcatagga
    56641 agtaaataca acagtaactt ctcttttttt atatcggttt tcggaaaaat gggtgagatc
    56701 gcattagtca cagccttgat aatctgatcg aaatacttct ccgcatgtat aggaatcttg
    56761 tgttctatca catagttggg atcttctgct aattcatagt tatgcgtctg tctattgcca
    56821 atagatggtg ctattaacac gtacataatt cggtcaccta cattcggaat ttcttccttt
    56881 ctctgcgcca accttctaat gacgctaagg tgagccaaat tcggttgctt atatgcagcc
    56941 atttctttgg aaagcacaga ggacaacatt aaatgtctca cgtctgcccg attctgaaaa
    57001 agctcctccc gcgcttcgca cagacgacgc aaaattttat gaacacccac aggcactcct
    57061 tgctcacgca gctgtgtttg tgtcatgtga gaaaactcca cagcagcagt ctgaacctct
    57121 tcatcaaaaa acaacaagtc cacgatatct ttcaccacac ccttcacaaa atcgcaagaa
    57181 gtctttctca ccagatctac ccccttaaaa attaaaagcg aatcatcctg tctaccaatg
    57241 tatctttttt tacaaatcaa aattaacgga cataaaatct tttcaaactc gagcttgata
    57301 ggcgacttga acagacgatc tgtgatatgt ttggcgatca tcggcgcaat ccttcgcaga
    57361 gactgattaa ccatatttct gacagacata aagatgctat ccgtatcacc ataaattacc
    57421 tccacttcca aatcaccagt aaaatctgat gacgttaaac cgaattcctc gcaaaaaaat
    57481 tgctcggact gcatcttgga attaacataa tccaccgtgg aacaaagcat ctctcttcca
    57541 agacacgtta cagaagcagc aatcgcaaca cacggcaata acccgtgcgc cgctcccgta
    57601 acaccgtaca ccgagttaca tgttgttttc agagcgagct gctttttatc cagaagaagt
    57661 ttcatcatcg gatccgaaca gttctgcatc tccgccttca cttctcgtct cttggccagc
    57721 cagtccttta gtagacttcc aagcacagac tcacggatac aaggcttcac aaaccgatga
    57781 gtctcattcc ccaacttcac ggttaagatg tcactctctg acaatccagc tatctgtcgt
    57841 tcatccaaaa ctaaagtact ataacacaga ttatgcgcca tcataatgct cggatacaaa
    57901 ctttgaaaat caaacaccac ggtaggcaca gcataataac ccgtcttagg ctccaaaacg
    57961 gtagcccctt tgtaacctat cccttgtcta ttgtgcgaag acaccatact cggaagaatc
    58021 atattacggc gttttgcttc cgtaagaatg cagggaaata tcttcttttg ctgaccctcg
    58081 aacaccacac atctagccgt gacgtgtgcc aatctggcga cctcggcaac ctcaaaatga
    58141 taattaatct gtttaaagag acgcacaact aagacagagt cctgcagaca atacttaccg
    58201 acaacagccc tgccactggg tccactaata aatttctttg gtatttcctt gtacgataac
    58261 tgctcctttt cttgctggag acagatctta gcaatagtat ccagtttgta attctgcgcc
    58321 gttatcttac tagaatagac gggatacata tccagataca acactccgga agtaaacacc
    58381 ttggtttgcg cctgaaggaa ccccttcttg tactgttcgt gagggacaga gattccaatc
    58441 tttccattct tcagtttaga aaaacaacca atatcataat ggtaaatctt atccatcctt
    58501 atacacaaat attttaaatc aaaattatta atattataac cggtaataaa ctccggagat
    58561 tcaatcctta aaaatatgaa aaaacccaaa agtaattcaa actctgacgc aaattcatat
    58621 atatgcacgc cgtcaatttt ttcacatgtt cccagagtaa acagatgtcg ctcatcacgg
    58681 tcaccttccg tatcgaaact aattacagaa atctgaataa ctatatcacc taaattttcg
    58741 gcatccggga aattcccatt ttggcccaaa cactctatgt cgaaggacca gcatccatat
    58801 aagggccaat taacgtcttc caaagaaact aaatcagaga catgacaatt aatttccacc
    58861 tcaagattac tcccttttcc catatcttga ggaatatatt tttttacatt ataccatccg
    58921 aaactcaaaa aaccattatc gacgaagaaa cgagtcaaaa catctacgtc gatttcataa
    58981 actacgaatc cctcattctg cagaatcttt ccaatacgtt gagatacata aaaatttcca
    59041 aaactcactt taaacagatt aacgacagtg ttggcattgt acccatacaa cgacaactta
    59101 tcaaccggct caattacaaa agaacacgac attttaacct cgccggttaa catcaaattg
    59161 tttatagtag ccttcaggct ttttccgtcg acgcattcgc agtagaaata ttgctcctgc
    59221 ccaaacacgt tcacgcagat cttctcaccg tcctcagttc tcccaaacat tctaatcact
    59281 gtccccgaag gaatcacaaa atgtctatac tgaaaaggaa gattctcgat cgaatccgta
    59341 aacattaacg tttctacagc atcatatatg tgaaacttca tcctcatatg atcataatcc
    59401 ttggaccgag ctatgtccaa actcggccag gtcatttctt tgctcagtaa atactgtcga
    59461 tctcgataaa acatacgcgg ttcagagtca caaacatcct ttattaagcc cgccgcacca
    59521 tcatgcatta taccgcgagg aagtatacga atgtaactcg atctgctttt tttctttaag
    59581 cgattcgctt ccaaatatgg attaaaaaat gacaccgaat ccatcacgct tcttctacat
    59641 ttacactctt ataacctcta tacctgatcc tgtctatcaa actaggtttt gaggcatgag
    59701 actcggaaga cgaaggtttt cttctgtagg actcgtctaa ggactttatg gccttgagca
    59761 tttttaaagc agcttcttgt gaatattcat cgtcacttac ttgcccactg acgtcagcca
    59821 taccctcctc cttttccgaa accgcaacag atgtgccccc gtcaacatct ttaacactag
    59881 gtgtcttgac gacagtggtc cccgtaacac tggacacagt agtcaccgga ttggtggcat
    59941 aaggaaacat catgtcaata ggcttactga gcacatgtct ttgtctaacg aaaaccacaa
    60001 ttattatcac aacaactact atcgctaaaa tcaacatgag accacccccg aatggatttt
    60061 ttagaaaaga caccactcca cccacaatat ccccaagcgc tcctgccgtg acacttataa
    60121 ccgagcccaa tccagtgcct atagccccaa gcccttgtaa aaaagaatta atcccattaa
    60181 catacgaagg tgtattcgta gcaattttag cttctatagt atatagtgcg ctcttatatg
    60241 agttatattc acgaagaata ttctctagat cgaaaacatt tgctctactc aattcgtccg
    60301 gcgaatataa atcgagtact ttaaaatcgg cattttcaag aggatcgatt tttagtctaa
    60361 taaaagcatc caatacctca atgtcttcta tgggcgtcga attcgtatgc gtataatcgg
    60421 tatacacgtg cgcatgattt ccagataaaa agatctttgt actaggtatt tcacattcct
    60481 ctgtcctatg atcacccaac agaatttcat tatctaaccc tagttgccca gggacaacct
    60541 caggcgtcga gttcacaaag ctaaacgtca ccaagggccg attataacac atcgtttcac
    60601 tccttactcc ctttgcatca acgacccgca tactcttatg aagctgaacg gatgactgat
    60661 taacctctat gcatttcgag atagctaaca cgtcaccatg caactgtgca gatatcggac
    60721 gaccgtaaac ctcagacacg atactcgacg gactaatctt actaagttcg tgcaacatcg
    60781 ttatcgttcg cttttgatca agacaccaag attctgccaa attccccaat gcatcattga
    60841 tataatcttt caaagtatca taaagatact gtaattgcac atagagaatg tcatgtctag
    60901 acttaacatc caccacatct cgcctcctac gtattttttc cgaaccctgc tcaagaaaca
    60961 taagagattt ttgcacaaga ggctgccaaa tcaaaatcaa atctcccgta gtcttaaaaa
    61021 tttgataact accattcatg ctatatgtat cattataatc tgacatatag acttcattaa
    61081 ttattttttc aaattcatcc ttaatacacg tttgtttcgg atcggtaaga tttaaggact
    61141 ccttgggggc gacgaaagcg gctgtcaact ccttagagat aaagtgataa gtctcatccg
    61201 tctccgctcg aagcccgtga gtcaccgtgg tccagtgctt tagcatacac accgattcat
    61261 tctcttcctt gatttcccaa gaaaacaaag tatccgcttt ctcgagaaaa gcgattttcc
    61321 tcactaacgt agtggcccca ttcataccat tcattagatc ttctatcata gtatagtttt
    61381 ccaagatcgt caatttttct aacggctctg caaaatgttt accgtttgaa ccgttgaaga
    61441 acggagaccc ttccacgatt tcgccagtcg tcaaagcaaa gtaactaaac gggtatttcg
    61501 ccttagccgt agcctccgtc acaatacaat tgagagacgt tgatgtagaa tatagccaca
    61561 aaggacccct tgcaaagtag ggttctttcg tagtgataaa tcttttatta gttatagatt
    61621 tgaaattcag aggaaataaa tttagagtat tgtttttatt attatcctca tgaaaggcac
    61681 taaacaccgt accatcgggt cgtttcatcg ctacggcgga ataacactgc gcatgagaat
    61741 taactaaatt tgcttcgtac accggcatgg ccaaacccat caccgtccga tccagaaaat
    61801 aaaccacacc cacatcacgg taactacttt ggaacgtcaa ctctttttta tacgttctca
    61861 ctggaaaagt gtaggtctcg atatttgttt tgtaaatgat gaaaaaaccc tccgacatct
    61921 ttgcattaga cttatacggc gagcacgaaa tatctctgtc gaaccgcatt aaatccgtgc
    61981 ctttggcaat cgaacaaatc cgaaaaggat atttgtgatt atagcccgct ctgatataat
    62041 gatccggatc acaatatatc attaaaacac tattcatcaa aaagacagcc aggaataata
    62101 ctaccatctt gctcattttc cctaacgaga tctagtagat taggcgttcg aacacagtaa
    62161 cttactcctt ccggcacgtc tacagtctct ctcgacaact gagcttgcaa atcacaatat
    62221 aacagcgaat acacgtcttt aaactttgtc atgccaccac cagtgtgaaa taataaagga
    62281 gactcgtgat taaatgtcaa aacgacattt ccattcaaat ccccctcctc atctatacgc
    62341 acaattttta atcgctttcc aaaaacatca ttatatagtg caacagaaag tgttaactct
    62401 ctgataaaat tccacatttt tttctgcatg tcatttacat cagttacacc agaaaagtta
    62461 aaaaactcat tgtattcgca caccatccac acactaggat gaatagtgcc ctctatgcat
    62521 ctagctaaat cttccttcat atgcggtaac atctccgcgt ggtcgcaacc atacgccatt
    62581 gagatattcg ccggaagtgg ataggcagat ttatgaaaat ccgataacgg acccgttaac
    62641 aatgtgtaca taatctcact taaatccggc aagagctcca aagggagctt cttcggcatc
    62701 agattgtttt taatataaag atgttcatcg tatgtacagc tatctacacg gagagagcca
    62761 tccaagtaca tttttctgag aacgaaaccg ttcataatct tcgataaggc ctcaaaaata
    62821 aaattcccat acacattcac actcactacc ttattgatga gcgattcctg ctctcgaata
    62881 catgccatca ccctattata accagattca gaaacttttt gaaaatacgc ctttttccgg
    62941 gccaagactt cctgctgaag attatgagtt tgaagcatgc aattgatcgt gttcagcctt
    63001 cccggcgttt ctgtcgtctg tggatcccga atgtcatgca aaagactctt aattttatgt
    63061 tgaacctcat cttcctcagc caatctttta aatattggac tttcctcgag atttttaatg
    63121 ctcaggccag tgacaagatc tatcagcctc gaaggagaca cataaatgga gccaacgtac
    63181 aagcgctcgt catgcgttaa caaattttca ctcaaagcca agaagtcttc agacacttca
    63241 ccgtaaagat aaagactgac atcattctgt aattgcttat acaacgtatg acaactattt
    63301 aactgctgaa gcgtaatagc gacatttctc actatcgttt ccgatatttt tgaccaatac
    63361 gtaaactcac ttaaagaata tatcacgtca ggtaccttgc taaaaatatt atactttttc
    63421 agagttttct cagcatcact aacatgcaac gactcggctg aacgctgctg cttaaaaatc
    63481 tttttgattt cagtcgcaac agactgaaca gtcccatagt tcaaaatagc ctctcctaag
    63541 tctttctcta tcgtctcaat gtttttttca atattaaaaa aagctttttg ttcggtcaaa
    63601 tgattacaaa acttcccatg taatcttctt cgaagtgatt ttccttggtt tggagtcaaa
    63661 gtcaattctt cgtaacactt catgcaagtc ttggtttcga gataactctc cggtttcgca
    63721 accatacatg caccacacat gatagttaac aagtctataa tttttccgca aatctgcaac
    63781 ccttcttggg gcaaaagtaa agcatatacg gagttgatct tactgattaa ttgttctata
    63841 tcatttagcg tagataattg cacgataaac tcaacaccgt tattcaatga aatgtttatt
    63901 gacaagtgct cagcacaacg cctcaaacac aacacctttt caaaatattt ttttctatcc
    63961 tgatctacca taaagctttc caacgctgca tccaaaagaa gcacctgttc atacatagct
    64021 tttagcagta cctgcatata aaccgtcaaa gctgacgcac aaagaagatt ttgttctttg
    64081 ataccttcaa aaaaagtttg atataaatgc agaatcacaa tcccattctt tttaaaattt
    64141 gccatatcag acaatactat tacaggatca caaaacttta aacattcaag gtccaaagca
    64201 cattcattaa gcctagcgca caacacacac agagattgta acgaattcat actccgatta
    64261 taatcggttt ttcttagtca tcggctcatc tgtttcggtt tccgtttcat cacattttaa
    64321 tacaccgttt ccttgatcat cctcctccgc tagaatttca gaaaagtcat agaccggagc
    64381 atcgtttgaa gacaccgtct cgaataccga ctgcagatta cttattgaaa agtctttcac
    64441 attcatatca actaagtgat tcaatttaag cattatggat gccgctaagg cttccctacc
    64501 atccacaaaa aaaagcatat catccatagt cggcttgtct tccctatccc tcatcacctc
    64561 agctattatt aataattctg gatcaatatc gttagttaaa ttctcaacaa tgctgagaac
    64621 cttgccctta actacttccg tatcaaacat aattgcctca cgccgaacct ttttcactat
    64681 aacttctgaa aactttgtag caataatcgt tttctgtctc ataaatctaa aatcctgcaa
    64741 tgcagaagag gtagggttta agttcctatc cacgccactt ccacctatcc aacctaactg
    64801 gccaaactga aaatattccc tattagccaa actcacaaat ttctctaatg tcaaaccaaa
    64861 tgtaaccaaa gatcgacttg tgaaaattgt accaaaattg ggttctttgg acagtgacgc
    64921 aatcacagga ttcggaacgc catccaaaac taacttttta acataaacta aatattcctg
    64981 aatagaagaa aatttaggct gcttgtctaa caccacggga aacaacacag gattctgcgt
    65041 aaccagctta gatgtaagac cgtgtaagct agtcaagtag tcatgaaaac ctaaagccga
    65101 caaaaatttg ttatgaaaat aacaatctat aaaagttgag agacactctg gctgtatgtc
    65161 gataatatct atctcatcat aggtattcgt aatactgaat gcaaatttaa taaaagtttt
    65221 aacttcttcg gggttaccaa tatctaaagt tttcggaaca ttgttgagca gaaaacgttg
    65281 ccatagctct aagcacgaaa tcttcacatt cggaaacaat ttatcatgat atttaaataa
    65341 aagaaaggag atacagccag acaagggatt cttcttatgt ttcacgtttt ttttaaaata
    65401 aggattgttg tgtgctgtct tactagactt gttgaacggt ctatttttta ttctaaaatc
    65461 tcgaagacat tgcatagaca aacggcaaag tttcgcctga atcgtagttt tcacatattt
    65521 acccgattta tatagatcgc aatctaagat ttgctccata tcaacatttg aagcgacttt
    65581 aactgttctc gtattcagaa aacccttttt gagatagctg ctgtgaaacg ttccgtatag
    65641 tgactggtac tgctgaacga gccatttaga aattgaatta ccggtacaag gtctatcgac
    65701 aacatgacct gaagccacta tcaatgcgag gttctgcaaa accgtcaaaa tgaccttata
    65761 atatgaaaac gtcaaaaaag gagaaaaggc agttgcataa ggggtcgcat ctacattaaa
    65821 tgactgtaga caattttcta tctgttctct aggcgtttgt gtccttctca tttcaacaat
    65881 gcatctagaa acacattcct cgatacactg tgttaatccg tgaattatag aaacaaaatc
    65941 ttttttactt cgaacattga aagtatcttc gcctgttaca ggatcaatca gagaattttt
    66001 tttacagtaa tcgaagatct gagatacgaa tttacccctg tccagtgaga gcgtgttttg
    66061 ttgatctttt ccaatctctt tgagctcgct gacaggcttc ctgccaaaag agcctaatat
    66121 atcaacctcg gcataatacc gagaaaacat gctcataaca agtggttcct ttttaacatt
    66181 ctttggtatt gccggcaaac gactaccgac ccgcaccatg gcagttccaa tacacgattg
    66241 acaacatttc ccatcacaga attcacataa attcgccgaa caatttacca aatgattgta
    66301 aatctcagta tgcgcattac ccgcgttata aacgctcata cgatttaaat tccacactac
    66361 ataagaaagc agctgtggag aagtcgcaca ggcataagcc aagtgattag ctgaaaattt
    66421 gtcatctttg cctgatgtcg aatcacattt gataattttt ctattatcgt tatacacatc
    66481 ctcagtcaaa gacgacaacg cattacaaaa agacaaagat ctcagcagta actcctgagt
    66541 catcaccgaa ttaaacgctt gtttcacgtt tggtataaat gccaattttg agcaatataa
    66601 gatagaattt ggggcaaaga tcaaaacagc aagatgacta gacagatgta actttaaatt
    66661 cgtgagctgc gccatgcgtt cagcgtgtgt ctctgagttt cttatgattg gccagtcatt
    66721 aaaattcatt atctgactag ggtcatacac cgaatccaga tattcggcta catgactaaa
    66781 cgataattct gtcacaacgg aatcaaccaa catcaaaaaa tctttctcga ccgctgaaat
    66841 tttctgtccg gagataccca gataagtttt atggggtgct aatttgacag tttgctcccc
    66901 atcctgtgta aattgtttca ggccagcatc gattaattcc ttagtattag aaaatcgtaa
    66961 tgttgtaccc cacgatgtaa aaacataata aaaaagcgtc tcacttaacg caggcagaaa
    67021 aaatgctcgt tcctgaataa attctgtaca ggaagataaa gaaatcgttt cttcagtttc
    67081 aaataaagtt gcggaatata gaggaatttt cacacacgaa tactccccaa cttgtacttg
    67141 aatttgttct tcaacacaag gaattaacag accagcgaac aacaactctt tgaaaccgtt
    67201 tccacacgca acatgacaaa taacagaatc tgcatctttg ccgacagcag aacaaagagc
    67261 tttgatatcg attactttgc gtgctgtagg cacctcaaac gactgcaagt gaaatttctg
    67321 tctggtttgc tcacataatc gaataagatc accatgatct tcggccatac caactaactg
    67381 ctcagttcca tgaaaaaaaa aacacacggg cataaaagac gtaattttag ttagaattgt
    67441 gcctccaaaa ttagtgatag gtgttttaac cgtggtcgag aaatcgtttt ctacagtcaa
    67501 attcattaac aacggcgaaa taactacagg agaatttctc tccattaacg ataaaacaga
    67561 taaaacatcc aaaagttctt tatcttttgg gaaaacatag atccaagcag cagtagaaac
    67621 gggagcagaa actaccgttt cgttttcatc agccatcttt gtggatttga tcacaaaaac
    67681 aaagataatg gggttttgtg gtgaaatcct tatatattat gtttgacgta acataacacg
    67741 cgtcatcaaa cataagagta aaccacaagt tggattatac cgttttctat atgaggttta
    67801 cggacaaaag aaaaacgatt tttttatgca aatattttcc acgcagatga tatgacacgc
    67861 cccttaattt aaatttatgc aaatcgtcgt ccaccccagg tacaatagta tattatatat
    67921 atattatttt aataaactta ttgaggacgg gagaacgagg gcgtggcgtt tacgtcatag
    67981 tctaattatg cattctcaga acaggattta aaaaggctgc gagcggctga ctgttcagag
    68041 ggacgctggg gtacggcttg agacgtttga ttgaaaatga ttcttcgtgt gctattttct
    68101 gcaaaaaaat taattcgccg gcgacagtaa acttttcagc ggaatttcaa aaattaattc
    68161 cacatgtaat ttaagcattt taaaacgtat aactcacaac gtgaaaacat atttacgaat
    68221 acagtagttt ccgtgatatt ttttcgaaat taaaaaattt taaatcgggt aaatgataaa
    68281 gcatactatt agattccact gtataagaga cagataaagc atactaagtt tttttgaggt
    68341 tttcggtata atgttaacat ttagttccac atgtaattta agcgttttaa aacgtatagc
    68401 tcacaacgtg aaaacattta cgaatacagt agttttcgtg atattttttc gaaattcaaa
    68461 aattttaagt cgggtaaatg ataaagcata ttattagatt ccacatgtaa tttaagcatt
    68521 ttaaaacgta gaattcacaa agtgacaaaa cattcacaaa tacagtagtt ttcacggtat
    68581 ttttcgggat taaattttaa atcgggtaaa tgacaaagca tgctgttaaa ttcacgtttt
    68641 tagggcaagt tcttcgaggt ttgctctgtg attatcagtg aatattcagc gtttcaattt
    68701 tagattatgg ttcggtaaaa atataggtct ttgaggtgtt tgaagtcgaa gtcgttaata
    68761 tcgtattcag aattaaggaa ttggtattta ggatagtttt tcagtatttt tagtcgcgac
    68821 gaggttatga cgatgttttc gtttgcatag tttaaacggt aaattcagaa tccgaaaaaa
    68881 gttcaaagag tttcatggat agactctaaa acaggctttc aaattttagc tagtatttat
    68941 tttgaatttc acttagggta cataaagttt tggcatcaaa atttttttga ttttagaaag
    69001 aagtagttca gagtgtgaca gcaaaaagtt tgtacaaaat gtaagaattt gtttacggta
    69061 agatcgttat tctgagtcag aagaacatgc gtttaagtta gtttcacagg tgtcagcttc
    69121 atagtctaaa tctaagtcca tttcaacact cgattcactt tcatgtttag agttgacgtt
    69181 ttcattaatg ttaataatca caatttcttc ttgttttgct tgattgaagt ttagttctct
    69241 aggatttggt attttgttgt cggtttccat tgattcttct atgagaattt cggtagttgt
    69301 ttttgtcgtt gttaggattg aggtgtctgg tttttcgaca caaactttgg acttgagttt
    69361 aggcgtacca tgttttttat gtgaacgatg agaggtttga ggtaggtcgt gatttgttga
    69421 atagctgcat gaaggttccg tgtcgacctt tggacaagta aaagaaagat tttggtattc
    69481 ttcaggaaaa tttggaaata gcttaaactt tggtgcgtct ttggcgaaat aagtgcaaaa
    69541 aaatagactc ggtttccaag gagccatgat tcgttcgatt ctattttgac agctgacatc
    69601 atcgcattta tggttactga attgttttcc gatgagtctg ctcatcagac cgcattcgta
    69661 tcgctcggct actcgtcccg tgtcgaaatc gcggataaat tgcggtttct ttgtttgtat
    69721 gatttgctct ttaatttgtc gtagtattcg agcaaacgta acaacgatgg acatggcttg
    69781 ttgaattggg tgtctaaacg agtctggagt ttgttgttgt acttcaagct cggagtttgg
    69841 catctctcga tctagtacag gtttaccgca gagttgcctg agttttcggt attcgatgtc
    69901 accgtgtccg ttgtcgttga aaacacaggt taactttgcc atgttgagtt tgttgaaaaa
    69961 ttcgaatttc atgacggtga tggtatacat gaataagtct tgtgggttga ccggcaggtt
    70021 gtgaagatcg tgaaatttaa aataactgca ggcttcttct actgtagcaa ctgtaaaagc
    70081 aagacaaggt gagttggtca gggagaatat ccggtcgccc atcagttgct gattttcttc
    70141 tcgtgtgagc gagtctagac attgtcggta gcgaagcagc aggtcggttt ccagtatatc
    70201 attagtcagg aggcaaattc gttcgtgagt ctgtgggaat ctgtctcgga tgcgttgttt
    70261 tggatcacgg gcgtctccgt tgtaaggtct caggccgaga gattttagcg aaaagtttgt
    70321 gtcggcaaag gggactgttg gaagattagg cagaaaggtg atcgcattgt tttgagcgcg
    70381 tttttcttgt tgtttctctt cgatgatggt cttcagctgt tctaactctg tcagacttag
    70441 tgcgtctagt ctggattcat ccagttgttt cagaggtgcg agttttcctc gaaaattttt
    70501 ggcgaaatgg ctgatgaact tgctggtttg tctatgcgtg gaacgtttta tcgttctaaa
    70561 ggcggtttgt ctatgataat catgatgtga gcgttttact ccacgaggat acatgtttgc
    70621 ttataataga tgaaatgaca taaattggtc tttttatatg ttttttgaga tgcttttcgt
    70681 tggcgctttt ttgcggttaa gttctgcgaa aaaaggaagg acggtgttac tgatgcttta
    70741 atctccggaa atgctaggat atggcgcgat ttagttagcg tgtgcgttgg agtcaaatgg
    70801 taaagactaa aagaaggtct gggtttagag gtagtaagtt agttttttaa ttgctccaag
    70861 gcgatggaac aatgtacttg tttgctgttg gactggcatt tagtagcaaa gcacgtgctc
    70921 cacaagatga gaattaaccg atttccgtcg gctttgagtt gtatgtaaac taggacgtta
    70981 tctcgatttc ctctatgttg tctgttcagg cagctaaaat ccgaaactct tccaaattgt
    71041 gtttttttga tctggaggtt ctttgaatct attttaataa aagttacttg tgaaaactgt
    71101 tgcgctatcc tagtctcgta atgagtaatt agttgcgttt taatgactgg ccatcctatt
    71161 aatctgataa acgataaaag ggagtcatcc gctgatgttg cattgttgtt aaaaccatgc
    71221 gtgtttaggt acttggtgat tagagtctct gtagctatgt taactttgtt ccacagttgt
    71281 ctggatttta aatccatgaa acttaggttt tctttagggc agcctttatc cgttatgtta
    71341 tagattaatt cttcgatggg agccttctta gtaccgtgat gtagaaggtt gtttaaatcc
    71401 atttgcatct gaataaacgt cttgcaagaa tttcggtaac ctgctggtac gataaatatg
    71461 ggagttagac gtccatgtag cattttccct ttgtccatgt ctgtcttgta catataacct
    71521 attctgatgc agtgacctgt gtggtaaatg ccgatgtcga aacattcccc gggaaatgtt
    71581 atggaattga ggatctgact aagctcttga tctaaacaca taacgtgatt taaaatcttg
    71641 gataattgtt ttaatggttc tccaccggcg atcgctgtgc cattaggtaa tgggattgat
    71701 attctaagac cgatcttttt ccgacaaaca cagaattgtt tgatttcggt tggatcttca
    71761 gtatagtcta gtgtgtcgtt agttgtgtcg cactgggttt tgaagaagaa gatgggatgt
    71821 gtgtccgtgt cgatgcttgg aaagattttt ttccaggcgt tgatgagggt aagtcttata
    71881 aggcgacaca tcgagaaaaa tgtttcctcc gtaatagttg ctgtatcttg cagcggaaga
    71941 tccaagtctc ctatgtaatt tgtgactggt atgcgttcgt tgaatatttc gtgtcgtgtg
    72001 gtatagaatt gtttttcgac gtcgtcgcag agaaaatgtg tgtcttgcag ccagatggcg
    72061 cgagttagag cttcatcaga gatatattcg tcggggagat actgtaagat gcggttaaat
    72121 cccatgtttt cgtaccaatc ctcagagttt ccgaagcaaa aaatattttt atgtaaaagc
    72181 tgcaccctga atacaggaaa gggacggtga taatctttgt gtaggtgttg tcttctgtag
    72241 atgcgcttat cttgtatctg aacgtatcta tcggaagcgg agatttctaa taatccttgt
    72301 aatcctggtt ttactggaga aaaaagacct tctccgtttt tattacattt cgctatggca
    72361 cgcgttattt gttcggaagt taatgcttgg atggtcttct ttttagagac cagagcatac
    72421 tcgtattctg taacgtttag atttggattt tttaatcttt ttatgtctat gtatgtttta
    72481 aagtaacaat ccgcattaaa gtattgcttc atgatacaca gtaaattttc gtgcagggaa
    72541 tttccaagaa tgtggagatt tctctgacat tgttgcccta ttggtaaatt agagtcgtaa
    72601 gaagtgagat tgcagtaatt gacgaatttt gtcgtctcta gggccgtgtt gtaagcgata
    72661 tatatgtaat ggacacggaa tgtgttggtt agatgtgaac tctttctaaa tagattgatt
    72721 tgagtgtcta gatgtttaaa ttcttcctta tcgcgaagat ttttttgtct ggcgtacgtt
    72781 gagaagtctg caaagagttt tctaaatttt gattttaaag tgatgtttat aaattcggac
    72841 atggaagaat acgtgaacac catgtttccg gtgttttccg tgaagcattg aacataattt
    72901 ttggtagtcg tgatggtact cttttgttcc tcgaacaaat agtaaaacat tgttaataaa
    72961 agcatacctt ctgtttgccc gtaggtcgat aaaaaccaaa agggggaagt gggcaatagg
    73021 aatttaccgg tgagatattt gataatgagc gatttgtgga aataggccat gtatttaaat
    73081 tcgacgtcct ctctttcttt tccagtttga gataatatca tgtcgacata taacgattcg
    73141 gtttctttgt cgttgaggct gttggcgaca tcttcagcct ttatcggact tgcagtttgt
    73201 atgtagtggc tgagatttaa tttttcggca tggcagacaa ataccgtgtc gattcgcttt
    73261 gaatttttgc atttttgagt ttgaaggcag aaactaacgt tatttgatgg tttatattta
    73321 acaataatcg gaaagagtaa atgttcactg ggacttctac ataggatact aaaaattacg
    73381 ttggcggcat cgtattcagt cgcaaacact acgatggtca ttgtgtagag ctctgttgat
    73441 tacagatgaa tttagcttta aatgccctta gggtattggg gtgttatggg aaattgtttt
    73501 cgacgattat ctttgtttgg acaaccgact caggcaaagt atgaaatgtt gtgctcttcc
    73561 gacgatttag agaccgaaga gctgacgtat tttctggata tgacgtataa agattttgga
    73621 gtttatcaga atgatattat aagtcatcaa aaagacacgg aaactatgaa aactctgtta
    73681 ggcttattac caatgtacaa aaaaactaag ctcaggcata cggttatgga gcgttgttta
    73741 tctaattgtc ctaaccatgt taaagatgcg ctctgtgtag agcttatgaa agctgaaaaa
    73801 atattacaaa cgatggatgt cgtttttatg aaaactttaa ttggcgaatt ttccatgtgc
    73861 accgaaaatc ttaatcagtt gcttaacaaa ttcgctacag atcagtcaac acttagcgat
    73921 gtcgagaaaa taaacagtct catagagatt gatggcgaaa acagcaaacg tcttttagtc
    73981 gagttggatc cgattctcca tgaggagacg ggattatatc aagcgctgcc aaatgttgtg
    74041 acggaagctc caagtgaaaa ggttaaatcg atacgcgttg agtctgaagg tgagagtgta
    74101 tagttaagcg ttattggagg tggcataatg aaacaagaaa gaggaattgg cgtctagtac
    74161 ctgtagccgg tttattgcac gttcaggcat taaactgagg caaaaatgtc cgcaagtaaa
    74221 aattatcctg gcgatgcaga tgcctgtagg gatgtagata gttttgcgtg tggagttgaa
    74281 gatctttatg gagggaattg tgtctttgtt ccagatgtag gtttcgatca ataagccgag
    74341 tttggcaatt tcttttgagg gaatcatgag agccttcagt tcatcggcgc aaacgtacat
    74401 ggcgtcgaag tattgtatcg tatagctgtt cggtttagct ataaattctc tggatgcttt
    74461 tagatggaaa attgcaaatt cggggggaga cagattgatc atctcccatg gttccgggat
    74521 gtagcaaggg agaaagttga ttgagaattc cacatctcct gggagaagca ttagagagtg
    74581 ctcggataag ttcattagaa aaactgaaat gtcggtttcg tcggttatta tttcagtgac
    74641 gcattcgcag aatacgtcgt tgctgtggcc agtaataact ccgaagaaac catctgggat
    74701 gtacagggaa atatctagtt ttacgattcg aacttgatcg tgcggcaccc atatgagttc
    74761 tctatttacg agtgtgattt tgttggtgtc cataaaaacg tccattttac tattcctgtg
    74821 atggcttact aaaatagatg gttcttccga aatacaagtg tccgtatttg catttctttt
    74881 tgcgcggtgc cttgggtaga aagttactgg gttgccgtgt ttcctttcat agttaacaca
    74941 atcggtttct ctttgcttct cttttttgca ggtcttcgac actgttccat tttgcggaat
    75001 acctagaagc gggattgggc gttgataaga ggttagttcg ttttctagaa attttttaaa
    75061 tgatttctta tttacagccg gccacacatc gtgcgttttg tcttcagata tgtctgtagt
    75121 ccaaagttca ttgatgtcca catttcgaaa gacgaaaaat tcaatgtatc tcgagctcgt
    75181 ttgtctctgt agggtaatcg tttcggagat cttttctgaa attgcgctgt acatttttcc
    75241 aggtgacaga gagctgtctg ctgttaatca cgtcgacgcg aagactagtt gaaaataacg
    75301 cttaagatga gttgtaagaa aagcgcaagg caacgcttat atgtcagtct ctggctcttt
    75361 tccattcttg tttttgcggc cgctacggaa gtggactttt attctccaga gtgccattcg
    75421 catacctatg agatcgtctt gaattcgttt tcttcgatct ggcttttgat aaatcttttt
    75481 ttattgttat gttctttcgc gattttcttg aaatactggt gttataagac ttttgcttca
    75541 gagacggtga agggttatta gatcgcgtga gacttctatt ttaagtataa atgtagcata
    75601 cgacaaataa aagcattttt gttgtgattg gatcttgttt tattatcttc aatagatttt
    75661 ataacgacaa aagacaaaac tcatttcaaa attgagtttt tattgaagac tgaggatgag
    75721 cagctttggc aaacgtatgc agttatgtgc tgtgttgttt aaatcgcgtc gttcgttgta
    75781 tgtgttatgc gttgcatttt gggttgagta tgctttggtt tcagtagtga ggttatctgg
    75841 atggttgtgt gagtttttat cggtgatgcg gtaatcgttg tttccaggta gagttgcgtt
    75901 agcctcccga ctttttgtgg aacttttttt ttaaacctct gtagatcgtc ccgtgattgt
    75961 ttgggggtag atgttagtcg tttgtgacga gatgttagct tttgttagtt tggctgattg
    76021 agttctattg ctagtcgtta gctgtgttgt gatatgatct gtccacctta gacttgtatt
    76081 cgttaatggt tccttaggcg ttgttgataa taaatttgac caggttagga tggcgggctt
    76141 tgaagatgtc gttaagaacg tttcagcggt gaaggaccgt tgaggtgtag ttgatttttc
    76201 cgatgtgtga gcgttaagaa ttggtgttat ttgtgctatt tctgtgtggt ttatctcttc
    76261 gtgagtggac gctgacattc tagtatgctt tacctcttta gtgacttcag tgattgagta
    76321 tgatgaatta ctagatggta aagcgttgtt agttatgtgt acttcagttt tggcagttac
    76381 attcgacggt agtttttgtt ttggagtgac agacaacgtc tgaatggtag gtagctcgtt
    76441 tgaggatttc aaggttgtcc tctggaatct gtcggtcatg ttttgtactt ctgtgttgtg
    76501 actcatgtat gtgcgtgccg tgttttgcca agtggtaaac tttaaaatcg gagtggtgtg
    76561 ttcggcgtcg gtgaattttg ttgtactctg ctgtgatttg ctcttaagat aaatagagtt
    76621 ttttggtgaa gaataggtat tgccgttaat ttccttgatt cctattgttg tgaaggtggt
    76681 gctttcgatc ttttgggttg cgtttgttgt tactgtagcg ctctcaaagg ttttgggaat
    76741 tctgattgtg gtattttcaa aatttgttgg ttttggtgga ctttttgggt tttcggtgtt
    76801 ttgttcggtt ttaatagtgg cgttaagacg gattgtaaga gttggaatgt cggttggggt
    76861 gtacatgggt cgaggaaaat ctgaacgttt aactattttt ttgatgcttt ccgttgtttg
    76921 cgttgttatg gtgggtgtgt tcggtgtaac ttttatggtg tctgtatgca gttttgtaga
    76981 gttttttgtt acggggggag gttctggggt tggtatgttg gtactaggga tatgtggtga
    77041 tgtgagagac gctgacgtcg atgatggtgt cgtagttagt atcgaatcaa agtttactat
    77101 ggttcgtcca aaggaagtag taacatttat aggttttggc gactgtttaa aatattgatc
    77161 atttgaaggg acgcatgatg ttgtgttata gagcaagaag taaacaaagc tggtgtaatt
    77221 aaagaagatt tctgacgtga acgaagtcaa tgaccgtgtc agattcgagt tggaaaattt
    77281 gctcattgcc atccgcaagg attcttcggt cagttttatg tcaaataact gtgctcccag
    77341 aattttaaat ggtagtaact ctacgcatgg cggatctgcg gtatatgtag atagtgtggc
    77401 aaacagaaga taaaatagag aaaaactgct agcgatgata gatttgtttg cagccgtcga
    77461 cgatagcact attttggttt ctgtccgcgg taaattctgt aatggagaca agttaaccgc
    77521 agacttgcat tgtgaatctc gaatgtccca agagaaaacg ttagttaaaa tttgagtgaa
    77581 gcagtcgagg gatagatttg tctgacaaaa acttgtatac aagtttcgga ggtcgtaaaa
    77641 atgttctctt tgttcgtcgc tccaattgtg gcggttgacg gttttgaaag cttctaaggg
    77701 atcagacgtg tattttatta gattagcgga gtgcatgact atcgcgaaaa ggcccagaaa
    77761 aaggccgagt tgcgagatgt gaagcatgtc gggtgagttg accacaatga atttgtacaa
    77821 gtagaatgtg tgactaaaat agtatttgct ttttttatag gattggacga tgacctccaa
    77881 atgcatgctg tgttggaccg cgattacgaa tgccctggct attttaatgt tattactagt
    77941 aatttaccgg gcgataatcg gatttaatgg cgatatttat acgagcacgt tgtcggcgtt
    78001 tagctgtata cggacaaatt catctaatac ctaagataaa taaaacgttt attcaacaca
    78061 atctgataag tctatataat ccgaataaag caattattgc gatcagaata taaatgataa
    78121 ccaatatgat agacacttgg tctatatcga ttccgacttc agacatctca aaaacagagc
    78181 cgtttttggc taacaaaaga tagtgcgtcc tggtgttggg aacaagtaaa ttgttgttgg
    78241 gatctgtcaa tgtttttagt tcgtctatgt tttttatgta aatgtattgt aagggaccgt
    78301 cgatatcatc atattccatg actacgctct gacagaactc gcatgtttga gatgagatgt
    78361 ttcgtagcac aagcagatct tgtcctgcat atttatagtt ggttgaaacg caggtggaat
    78421 tgagaggtat ggctgtgatt attatactcg tagccacaat tgtcgttgta attgttaggc
    78481 tcactccttt aatcacgtaa gagggagaaa ttacaaatgt cacattcggc agagtcagag
    78541 aagctgctgg ttcacttggg gagagacact gaatagccgc tactctctcc atatttggcg
    78601 gtctgtatac ggatagcatc tccatcatgt ctgatcgata acggtcaagg gaagcgtacg
    78661 tgagaactgt ttttagaaaa gaatttgtta catctctgcg tacgggggag gcacaaggcg
    78721 aataaatatt ttctagattc ggtgccctgt cagctgtaag catgcgggcc catgaaacta
    78781 tttctacggg gttacacagg tttccaatta gtagttgcat gtgcctctgc atgcgttcat
    78841 cggtagggat gatattcgct atttcggcta gcatgaatag agtttcccta tcggaaaatg
    78901 tcagattagt aaaaaacatg tgtttttcat agatgttttg tagagtgttg gcaatgtcag
    78961 tccacttgta cttggaaatc gttacattgg attcgtacgc tgtcgctaag tacgtgagca
    79021 gcgtagatac ggaaatggat ttgtttttgg ttatgtagct atagtccgag ggctcgtatt
    79081 ttaaaaattc cttcattttt gggtattgta acgtaccttc cgatacgttc acacatcggt
    79141 tgacaaatga gtcgatggac aggagatttt cgtgtgtctt taacactctt aacacgggca
    79201 ttggtcctgt gttttttgtg ctatatgaga aatgtacgat accgtaaaga aacatcatct
    79261 gcggtatgcc ggcatagttg ggttttttac agtctcctct taatagggtt tggattccta
    79321 ggttattaaa tttgagtagt agagcttcta cttcatctac gtcattcaac gtttcgtcta
    79381 cgaatgtcgc atctgatatg aaacggtatt gtacatctat tacgtctttt tcgactatca
    79441 atagtaaatc gtctgtcaat gtctgtttga atatgaatga acttttctta taaggggctt
    79501 taaagtttat gctggtggtg tttccgtaca tcatagtcag atctcccgcg ggattctgga
    79561 tgtacagtat cataaagtcc ggagtaaaga aatgggtata gatgtcttcg cccacatagc
    79621 gcgtaatttt agcgcatctg acttggactg gaaatattag ttccttgaga gaattaggca
    79681 gcttacagga aacgttgtcg tattgcatct gtcgaacttc tacgaccctg acgtaataaa
    79741 ttccctgtga agggtacatg tttaaggaat acacaacctg cggttggata gagcgatcta
    79801 agttaaattg tttgaccgaa ggtacaggag aaagtcttaa aatatcgttc attggcggct
    79861 cataaaaacg tgtaacgcgt ttttcataat ttgttaacga ttctgtcgtg ttgatggcat
    79921 caaacaggtg gtatgtgata tcggagccga gtaagcattt agggacttga tatatccgag
    79981 tgtcgttttt tgtataaaag ttaaatgtta taaagccggg gcgaacgatt ggattttcaa
    80041 agtttccatt tctacaatgg ctcgagttcg atatgttcaa cggtctccaa ccgtaacagg
    80101 gagtcaacag gacaaagacc cagagtcgga ggagcatagt tgttcttcat cgatgaagtg
    80161 tgaaacggtt ctgctattct ttgaaagttg aacacttttt gatctttcca tattaaatag
    80221 attacaaaaa tgatgtgtaa tggaactcgg aattgtttct aaattctccg tgtctttttt
    80281 tccccgtgaa ataacatgtc tctgacaggt ttgcctgata tccggaaaaa aattggacag
    80341 tttcaccact tgaggatata taaacagatc ttatcttttc aaggaaattt tgcgcgacta
    80401 aattattttt taggagacgt gtttccggct aatttgcgat cggcatctgt ctcggtgttt
    80461 ttcgaggtgc gtctagggcc gcgcattccg gattgtatcg tcttgctaaa gagtgtagat
    80521 gtcaaagatg agtttgcttt tcattgttat tttttcgagt ttaagacgac tttggggaag
    80581 tcgacgatgc agtctgtgca tcacaactgc attcaccagg cgcaatattt gcaaggtttg
    80641 agacagttgc aacagtctat ttcgttcttg gatcaatatt taatcgcaga cgaggtttcg
    80701 tggaacgttg ttcccgtaat ctgttttttc aggcagtggg gactcaagtt agattttttt
    80761 aaaaagtttt cggggaagac caagcggttg tcattttcgt ttatacgtga tttgttcgcc
    80821 aggtctcagg atggcgcagt gcaatctctt ttatcaatac ccaattacac caattttaga
    80881 agggcatgtc agaaacatac tgatttgtac agaaaaagat gtcgaaaagc tccaaagtca
    80941 gtcctcacta agacttcggg agaaaataga tcaagggcat cgcgacaagt tgctaagaat
    81001 gcgcctaaaa accgaattag acgcactgca aaaaaagatg caaaaagaca gtgacgtttt
    81061 gaattctcat ttgaaagcga tagaggatgc tttgctgttt acgaatgatg gggaggtaaa
    81121 cgtcgaaacg aaagctgatg cgcaactgat accgaaatct cctgagaagc tggaaaaatt
    81181 caatcaggtc gctataaccc cactcgaccc ctttataaga tttacagacg attttagagg
    81241 agaaatgatc aatacatttt tcaataatgc ccagatgtgg aattttacgt tcgggtcttg
    81301 gttctataag ctcaagaggg ttttttacaa tgagcccggt ttaagaaggg ctttaaaact
    81361 tactaatgtg gattctctga ctatttcaaa agagttacta gcagttaccg tcaatgcgtt
    81421 ggagcaagcg acggtgtatc ctatattcgg aagtgaaatg tcagacctgg aagcagcctt
    81481 gtgtatcctg gcagcttttt attccactta tgagaattca cagatcgacg aacgtacaac
    81541 cctagtagat gttataaccc tcttgcctgt gatatttaga ttactcggca gtgaaattac
    81601 aacattgaaa aatgtttctc cttctggcac ctattttgga tttaatgatc cttcttgtat
    81661 gaaatttttt gttcccatga gaaaaggcaa gcattatgca gaaaacacat tcgggaatca
    81721 tgtgcttata aagatgttgt taggtagagg ggtaatgcaa aaaattcccg gtgagaaaat
    81781 tagtcaaaat tttgatgttg aagctcgttt acacggggcc attaagaatg atgttttggt
    81841 gtattggaca tatcagctaa tgaggccaaa attgggaaat aatgttccaa tcttcataca
    81901 cgatcaacat tatttacggt ctggcttggt tgcaattgaa agtctttttt tattgtggcg
    81961 gatcctgaac tcagaaagtt tgtttaacaa gagagttggg aagtttctct taacttcggt
    82021 ttttccacag ttggagaatg tcgatttcgc cgaaaataac tttgaagctg gaaatattca
    82081 aaattttgaa tacttaatgc accattacgt tgtgcctatg tacaacctgc agaatgacat
    82141 atcaatttcg actctttttc ccggtctcgt ggccgtgtgt gtaaatgaga gtgtgagatt
    82201 gggatgggaa cataagtgtg cgggggctcc gtccgatgcc gttcaggttc aatctaagga
    82261 aaatccgttc gtggagtata tccgcgctca aatggaacaa caagcggatg tggcgatact
    82321 tgaaaagcat gactgcattc tctttcatct tgaaaacggt ttaaacatca ctctatcttt
    82381 tacattaccg agacagagat tgtttgcaat ggcttcttca ttatttaatg taaatgatac
    82441 ttatgatttc atctattttc tagttttggg ttttctgcca ataccggccg ttatataagg
    82501 cgggatgttg tgttgattac gtcaatacgg atggggtttt ggatataaag acttacagag
    82561 cttttaatga atcattgctt cgtttattca ggatggggaa agaaacgaag tctttggctt
    82621 ggccagccac tgcggagttt tatggttggg tatttatttt ttcgtccata cagttgtgta
    82681 caatggtttt actgacggtt aggtttaata gttttaaagt cggtcgagaa tacgctgtgt
    82741 ttacatttgc cgggatgagc tttaattgtt ttttacttcc gataaagatg ggattgttga
    82801 gtggacattg gtctttgccg cgagattttt gcgcaattct tctctacatc gatgattttt
    82861 ctatctattt ctcctcgtgg tcattggtgt ttatggcgat cgagcgcatc aaccacttct
    82921 gttacagcac accgttgttg aacgagaatt ccaaggctct ggcaaaggtg tgtttcccga
    82981 tagtttggat catatcggga gtgcaagctc ttcagatgct gaataattac aaagcaacag
    83041 ctttgcagaa cgagacccca cagtgttttc tcgcgttctt aaggagcgga cacgacatgt
    83101 ggttaatgtt ggtttattcg gtcatgattc cagttatgct ggtgtttatt tacctataca
    83161 gcaaaaattt catgcttttg aaagatgaac tttcgaccgt gactacgtat ctctgtattt
    83221 atttgctgct aggtacaata gcgcatctgc cgaaagctgg cttaagtgaa atcgagagtg
    83281 acaagatttt ttatggtttg cgcgatattt ttatggcgct tcctgtttta aaagtttatt
    83341 atatacccgt tatggcctat tgcatggcat gtgatgatca cactgtgccc gttcgtttgt
    83401 gtagtatttg gctggtcaat ttgtgtaaga aatgtttttc gtgtacgcgg cgcgaaaagg
    83461 agtcggattt agaggttgga ataaaaatgt taaaatgagt aaggagttta tcgtttttat
    83521 tcataagaga atagatcttc ggcgctgatt cctgtaaggt caaatatggc agagctgtcg
    83581 agtaattgtg gattttcaga cataccgcag aagactttaa agtcgttttg gagaaatgaa
    83641 aacagtccgg ctttgtgctc ggctctttgc tgattgtacg ccagtgtgga tatctcaaat
    83701 tttccaaaca ttataagata ggcaaaccat aggtgtttgc agatgagccg cactgttggt
    83761 tctcgttctt gatcccccca aaatcggtta aagaatctgc agatttttaa aagtcggtga
    83821 ttatagatag ctccaacgga gaaaactata ttgccttcgc agattaattc ttccggaatt
    83881 ttgagattta caccaaactc gtccatgaaa agaaaattaa tcatgtgact aacatttccg
    83941 ctgtagtgca gcttttttga gatatatgct gagtgacttt cgttaaacat atgtcggagt
    84001 agttccgcgt cagaatgctg tttcagaata gaaaatattc gaaaccagta gttgttgctg
    84061 attttacgat tcaaaatcac tatgtctccg attccagaat tgtacaaact ttcgcgtagt
    84121 agtaagatct tgattccgtg tgacagcatt gatgtacata cgtgttgaat taaaagtaat
    84181 tcctcttgtt taaagctagt cagattctcg tttctaagca gttttgtggt tatgtgtaat
    84241 attaaattag ggacggcgtc gttcaatttt atgtactgtc ctatctgggt catctcaaaa
    84301 tgtctaaagt ttgggtaggt ggattccttt gtgtttatgg tgaagaaccg tcggaagaat
    84361 gtttagctct gcccagggac acggttcaaa aagaacttgg gtccggaaat attcctttac
    84421 cgttgaatat taatcacaac gaaaaggcca ctattggaat ggtacgcggt cttttcgatt
    84481 tagagcatgg gcttttctgc gttgcgcaga tacagtctca aacgttcatg gacatcataa
    84541 gaaatattgc tggcaagtca aagttaatca cagcaggctc ggtaattgaa cctttaccac
    84601 cggacccgga gattgagtgt ttaagttcaa gttttcctgg tctatcgctg tctagcaaag
    84661 ttttacagga tgaaaattta gacggtaaac cgttttttca tcatgtgtct gtatgtggag
    84721 tcggtcggag accgggaact atagcgattt tcgggcgaga aataagctgg attctagata
    84781 ggttttcatg cattagtgag agtgagaaga gacaggtttt ggagggggtc aatgtttatt
    84841 ctcagggttt cgatgaaaat ttattttcgg cggatttata tgacttgctc gcggatagtt
    84901 tggatacatc ttatattaga aaacggtttc caaagttgca gttggataaa cagctatgtg
    84961 gtttgtctaa atgtacgtat attaaagcta gtgaaccacc cgtggagatt attgtcgcag
    85021 cgaccaaagt tgccggtgat caagttcagt taactacgga acctgggtct gaattagcgg
    85081 ttgaaacgtg tgacgtgcct gttgtgcacg ggaattacga cgccgttgag tctgcgacag
    85141 ctacaacggc tatgagtaaa caaaatttgc caaatactac tcctttgctg tcgagtccac
    85201 cgttttcgga ttgtgttttt ttaccgaaag acgctttttt ttctctttta aatgttacaa
    85261 ccggacagca accgaaaata gttccgcctg tttctgttca tccgcccgta actgaacagt
    85321 atcaaatgct accgtattct gagtcggctg ctaagattgc agaacatgag tcgaatcgat
    85381 atcacagtcc ttgtcaggca atgtatccct attggcaata ttcccccgtt ccccagtatc
    85441 cggccgcgtt acacggttat cgtcaatcga aaacgcttaa aaagcggcat ttccagagtg
    85501 attcggaaga tgaattaagt ttcccgggag atccggaata cacaaaaaaa aggaggcgcc
    85561 atagagttga caacgacgac gataaggaga tggctcgaga aaagaacgat ttaagagaat
    85621 tggtggatat gataggaatg ttaagacaag agattagtgc gttgaagcac gttcgcgctc
    85681 aatcgccgca gagacatatc gttccgatgg agactctgcc tacgatcgag gagaaaggcg
    85741 ccgcgtcccc aaagccatct attttaaacg cttctttggc gcctgaaacc gtaaatagga
    85801 gccttgctgg tcagaacgaa tccacggatc tgctgaaact caacaagaaa ttgtttgttg
    85861 acgcgttaaa taaaatggat agttaaaatg tgtttttatg ttgtgatcaa gtggtgttta
    85921 gctgtgtgtt ataaggaaga ttcagagtga attcctggac atggtgaaac ttgacacata
    85981 attgtttacc gacgcgttca ataaaacgaa tggttaaaag ttgttttttg ttttttttat
    86041 tttcgtataa aatggtattt aggcgctagt tacggggaag atctatggga gtgattgtga
    86101 caaggaatga aatgaatgcc gacgtctcct tctaatatcg ttaggttttg tggggttcca
    86161 ggcggcatga attccatgcg agtagattct ccgggtttta gagaaaagtg caagggtacc
    86221 atatgtgcgg tgtcgaacgc aacgcggagt gaactcaaaa aaattcccat gttgatgtct
    86281 ggcgttaagt ttgcaaccgt gcttagactt ggtgttcgca atactgcttg gtttgtgaaa
    86341 gttacggtgt ttcttacggg accatttgga gattctgtgt ttacataaat tttgcttgat
    86401 tctgtccagt tgaattcgac attattcccc ggtggtaaaa tttgtttggg gaagaagtat
    86461 actacgccta taggttgcga gtaattgatg cgacggttct tcttaaatgc tttcatggtg
    86521 atgtagagag gtcgtgtctc atcccaaatg ccggtggttg tagagattcc gagcaagagt
    86581 ttgggtataa ataaacccgt aaagtttgaa tttgaattaa agatagtgtt aaaagaacaa
    86641 tggacaggag taaccgtgtt agggatgata tttttagttg cgcagacagt tattgaatgg
    86701 gtgttgcatt ttagaagtgt ttcttgattc tgcgacaatg ttatgtctgc ggtttggggg
    86761 gtcagtgaaa tttgtatggc aagttgttca ggataaaaat tatcgtcaat gagatagtcg
    86821 ttttcgtatt ttgccttcaa aattaataga tttccgcaga gtaagattct agaaatatag
    86881 acgtttttgt gtgatataaa ttcgatgtta gcagttttaa aaatttggtc gagcggagtg
    86941 ttttggagat taacccatat ttctgcatta aatgaatatc gtgttggctc ttctggtgtt
    87001 tgttctatcc atcgtatatc agccacttta attttaatac gcgtgagagg gccatatatg
    87061 acaaacttcg cgtcgcactg tccgtggggt ataatgtggc gatcgtgggc ttcgatgtgt
    87121 tgcaccgata aatttgctat attcatgttt gcgtgaggaa gtgcaaatat attaaggacg
    87181 ataggtaatc tactgagatc cagatctaga tctgagatgt tctgcaccgc gaagggtatg
    87241 ttgccgtaat cttttggatc gatgtaagta aaaggcgatg atgtaaaact gctttcgtct
    87301 ctacaaatgc acactatggc ggatggaggg gaggtgatac ctaatccgca tttaaacaat
    87361 ctcagttcgc cgggttttaa tatggcggta gttgttactc ttagctgtag tacgtacgaa
    87421 gaccattgta gagtggcggg ttgcatgttt gcttttctgg atgtctgaag ggaatcctgt
    87481 tagtgtattt tggatgttaa atagttgatg taaacgtaga gagtcatatg cgtattttta
    87541 taatagagtg tttttccacg gacgggagag tctgcgggtt tccacgcgca ggcttgtctt
    87601 cgtattctaa gggatgtaat gtgagttccg gtagcaagta tgcaggaaaa caattgccca
    87661 tgaagtgtac gtcgaatggt ttatcggtat tctccgtgtg tgttaaaaca gatttcatgt
    87721 cgctgtttga gagtgaacga aacggctttc taaacaactt cttcgtcaca aaaaagacac
    87781 gccctaacat gtcgtgttcg gttacggaaa ctgttctttc gcacgaaatc cgcaatttta
    87841 acggttcttg ggcaaaccat aaaaatgggt acagcttgaa gacatgcgtc tggacaggga
    87901 tgaagatgcc tacgattttt ttgttagtga actcgccgcg tagcgtgatc tctttgtttg
    87961 tattacttac taaggacata tcgttgggaa agaaaacctc tagattcttc ccgtctgcgc
    88021 agattttaaa atacggcata ttcatattta gcgtgacggt gctccgatca gggggggaaa
    88081 aggtcaagcg aagataacat tctttcgtga ttggaaaccg tcgcttgttt tccggcaaca
    88141 ctacgttacg caaaaagatt gtgagaaaag gatcgttaaa ttctattttg tagatagaga
    88201 tgccgggttc ggaaatcatg ttgactctgc agagtgggat gatatttttg aataggtttt
    88261 cccaataggg acattctctg gtatcgatgc tgaacacgct aaaaactatt agcagctttc
    88321 tgccatagcg gtctaatttt tgagactgat aaggactttc tgtccagttt aggttaaata
    88381 agatcaaaga catttcaacg ctatcattct gaactacttt aaattgattt atcacgttgg
    88441 ttgtcgagat aggcatattg gttaggccat attgttcgta tacggtcgga tcgatgtttt
    88501 ctttttgaca tagcgcattg atgtcgtcaa tctccagtgc atgtgacggc agataaatgg
    88561 gtatggaaaa taaatgaatc cgtacgggaa ccgtcctaga aataggtaaa atttttattt
    88621 tgatagtcgt tgttttttcg agaaactgta catcgaacag aacgtcctca gtttccgatt
    88681 cagtgccatc tgttatgaat aggattcctg gttttgtgct tgagattcga catttcaaaa
    88741 tgatttcttg gtaagaattc gaaactatgt gattgcaatc aaaaacgagt tgcaagacat
    88801 ggtttagttg aggagaaaac atgctggtac aaaaaacatt ttatgtttca tctccctttt
    88861 taaatactgt gtttttttaa gggatgaggt cattttgtat gacggatgga ggacgcgggt
    88921 gtcccggcgg ggtgtgtttt tataatcctg cgtatgagtg atagaaaagt catagtaggc
    88981 tagtgttttt ttaaaaagca tttaattttt ataaatacat gtagccattc tgttatctgc
    89041 ggaaacgtca cagacaacaa aatacgtttt ctcgttggtc aaagaattaa tttggtcgat
    89101 catagttaag actgatttga ctttttttaa ttcatcttta atttccgtag cgtgaagttg
    89161 tccgcagcgc tgtgtgttta acgttgttct tttagataat agttcttggc atttgatcaa
    89221 aagcattgaa tggtcttcca gcgttagccg atctatgtaa gttctcacga tgtctggggc
    89281 catggccgtg atcatggaca gcgagatgca agctgttttc atggagtaca ttgattgttt
    89341 gtcgttgact atgtctggta atttaatgag tacgtctctg tattggatag agcataactc
    89401 atcgatgatt gtttgcatct cattgtattc tctgtgaact gctataagac caatgcatag
    89461 caatctgatg ttgatctcgg ccgcaatggc tgtcggaacg actaaaggta cagtgagctc
    89521 ccaatcacct agtttcaata gcttttcttc cgagtgcgtc gataaaggtg gaatcaatgt
    89581 caaggtgtca cccttttccc aggggaaggg tcctgtgttc tttatggcat actgatggcc
    89641 ggtcaccggc tttctcaaaa ccagttgatt gccttccacc ttttgcagaa tggttacgac
    89701 catggtccgt aatacgtttc ggacgtggac gtaatctttg ttggaggaga cgatgggata
    89761 aagacctaaa ttgccgctac ctattagatg gtggtgagct gggatcggta tgacgatgtt
    89821 catgagcttg catagggtgc tgatatcgga aagtgacagt ttgtgatcga aagtgcagta
    89881 gacggtttcc attttatatg gatgattcga taatgagttg gaaaggtatg gtttctccta
    89941 tggcgtaatt acaataatgg gtttcgctga tctgcgtatt gccggtttta gaccgactct
    90001 ctaatagagc ttggttggat gaacagtgaa gaggcagagc gttttgtaag aactggcatg
    90061 gtctgcttac gaagctatcc gtgccctcag agcacgagta ttgtatttcg ctatcgctgt
    90121 ttaaacacga gttcgatttc atgcagtatt cgcttatcac tttgtacatc atcttgtttg
    90181 tttttaagat gtcagattcg gtaaaaaatt gagcgttggg actgtatgtc ttggggttgt
    90241 aacatagttg ttctctgtgt gccgtgttgt atagaatatc gcctaaggag cctggtagag
    90301 atgcccaagg atttgtggtt gcggcgaatg tatcgctgtc tgtttgggtg tggtcgtaca
    90361 atgcttttct agccgcctct tcgttgtgcg ggtccgttcc catcatacac gattccctgc
    90421 ctcttgggtt gtggggcgat ttgaaaaagt taatgtttgt cgtgaccggg gtcagtataa
    90481 cttcgcagat agcttgttga ccatgcagta gtatggaggg tgggtttttg ttaattccgc
    90541 cgaatgttat gatgtttagt gcttcgctct cggagggatt aggtttttct atcccgacgt
    90601 gatgtcgaat ccacgtattt atgtccgcgt tggtaaacgc gtgtatcggg aaggcggaga
    90661 aaaggttttg tatcttgctc cccatatctg atttaattcg cttaagattg gcagtggcgg
    90721 tggtagagct aaaacctaag cccatatcta caaaacttag gtgctgggtg aagttgtaag
    90781 tggttgcgat atctttagct tccgcggtga ccgtgggatc gtctaaaatt atagatgtgg
    90841 ctgctctgga actgtataat aggcactcga cgtcaaaatt atccgtccgg actagtgtgg
    90901 ccgcaaagcc cggatggatt ttgtttttgc tttggatcgc tatggcaacg ggagacaatt
    90961 ttgagtgcat ggcggcaagc gtcataatgc tcaacaggga attggggcag aaggctgagt
    91021 acacggaaaa cggtgttcgt tgccaattat aaaattctaa tgctaatggg ggcgggagtg
    91081 gaaaaccgcc gtcgtttctt tgatagtgag gaaatgtatt taggaaaact tggatatcag
    91141 cattcatggt gccacagatt cctgggtcgg agaagaatcg atgaaatggg attggttgat
    91201 agtaccgtct tagggtggtg attggtgaga tcaggcaaag cccgttgtat agaatgtgtt
    91261 gtagtgattg aaaatgaacg gagttgccgt gtcgctgcgc aggatctaag gagacctcca
    91321 cttccagtat tttcgtattt tcattaatgt agattagcga tttaaacagc tgttttgcga
    91381 tacaggatgt gttggctacg gtgtagccag ggcccatacc ttctcggatc agagacatta
    91441 gaacgtcgct ggtaatcgga ttctcctgga aataatcatc tggactgatg aacggttccg
    91501 tgtagaataa gtctagaact agttccttta tgttgacgcc agcgccacag gccttgttat
    91561 ttgatagtgc cgggagtacg cagaagtaaa atatcttgct caggatggtg gtttcgttcg
    91621 atggtctgtc attgtcggtg aagacgacgc ttgaatctat tagattcatt ctttgcacat
    91681 cggatatttc gtaatttcta actcttacgg tgttctgtgt cagtggtgta tcatccgctg
    91741 ttatttttgc attcgtgtcg tttctgggca tggtatggac gaacgggcag aacagacgtc
    91801 cgtcgaacaa cgcgttggcg aaattcacca gaggttcgcc gcaaagttgc tcgttgaggt
    91861 tggagataga gattgttctc ttcactaggc gaattagcga cacaagattt ctgtagtgag
    91921 tgaaagctgc tcccgggatc agttcgtcgc ccatgtggtt agagattagc atgatcatct
    91981 cgaagctgtt gcaaaaaaga agtatatgtt tcatgttaaa ccaataagaa atacattggc
    92041 taattacttg ttttaggatc ataaaagcat gcttgtttcc atgcactaag gtctcgataa
    92101 cgtaagccaa ttctgggtac gagccactcg tcaagctttc ggtgacaatt ttgagggtga
    92161 agtcgtagtt ttggcagttc gtctttgcat gttccagtat ttgatttgta cgggcttcgt
    92221 ggaaagagac tggagctaac ggtaaaggta tgttgcctat cattattctt ggtgtgcaga
    92281 gtacttctgt ggctcggttt ttctggatat acgtgagatc gaagaagggg tgtctttcgg
    92341 tcggcagtgt tggattgtcc ggtttgtaaa aatcttcaat gtttaattcg ttttttaaga
    92401 cgttggtgtt tttgggtact tcttgtcgac tttcgtataa gttgtataag gtctgtaaga
    92461 tcctggctgg gttttctcgg gtaattttta gttgacatag ttgggaaaag cggtggccgg
    92521 taggcaatgg ttcgcttttc atgagtcgtt cgacgatggt cgagtcgtgg acaatgggat
    92581 ggcaaaccga cggcaatatg tcggcaaaat caattcgctg cacgatttgg tctttattgt
    92641 ggaaaaaaac gctggtgggt aggttgtttt ccatggtgtc gtttaatttc acacgtgttt
    92701 ccattgtact gaaaccggtt tcgctcggta tgtagatacc caaagggaaa aagaatgtca
    92761 gttgtaagct ctgttctagc ggatcgttga cgtctgtgtt tttgtaaact ttgtgtaggt
    92821 ggtcgaatgc gactaattta tctcccagtt tcaacgtgtt cagctttagg tcggcgtacg
    92881 cgcggttttt gtcgaatatt tctgatttgt tgttagtgtc ttgttgttct gtcccggcgt
    92941 tcacggtgaa ttgagtaaaa tcggccatga ttgcacggta tgcaatcgca gtcactgcgt
    93001 tttctttgcc cataataaag tgaccatatg agattggggc ggagacgact tgtgtggaga
    93061 tgtactggga gagtatgctg gtgagttttt ggatagagcc gatcggtcct aataaaacgc
    93121 catctagggg gacgttttct ttggaagtgt agttgttcgt atcatttaga atgctttccg
    93181 taaccgattc catcatgtcg tttagaattc tatagatata tgaagtatta ttatttctgt
    93241 tcaaaaaaaa taatgacgtt aacaatctgt tctttaggct ttgaaacatg ttgctgcgct
    93301 gtactcggct cagagcttgt ttattatgta ctttgttctc attcatggtc aggacgataa
    93361 attgcggggg ggatttcctc aataaggttt gcatgaatgc gtgaatcaga cctcgctcga
    93421 gcgaatcggc tgaattcttt aaagatctta agactgtatg caacgcattg atgtttaaaa
    93481 tctgatcgat gactgtgttt ttaaatgtgt tttccagatg ttccagacag gcagcgctca
    93541 aatcgaacga tatgtttatg gggtgttttt ctgagtgttt ggctaccatg atggtggttt
    93601 cttttgaagc agttacgtcg tttcctgtag cgactctagg taattgaata aagaagagaa
    93661 ccttcccgag ggtcattcga ctcacatcat tgaagcggat tacgttcgct gcaacggcga
    93721 tcggcgtggt gaaaaagtta atccattcta ttttgttgca gtagattccg agtaaggctt
    93781 caaaactgat gttgtaacgg ctcggatcgt caccgaaata aattcgcaaa ttgtcaaaaa
    93841 gttgttcggc tgtgtatgtt ttaatgtcat tgaaaatatt tagaggtgct tcgatcttag
    93901 gtaaaatttc ggtcgcctgc caattttcca tgtttcggcg ttatgcagca caccggtaat
    93961 tgtgaaactt taatagttaa ttcatgtttt ggttccactt gtgcacggtc gattccagtt
    94021 tttatagatt cgtgtgatct gaccgctgaa gtgtctcgcg acgaggaaac tcgtttagcg
    94081 cgatccgtgc ctgtagttct ggaaaagatc gagtcaatca tagagaaaat ttttcaaacg
    94141 tccgggccaa atatcgttca cgataaagac agggctaaaa ttgccttgtg tcgtctgttg
    94201 ttaggaccag ttgcggtgcc atgcttctgt gaagagtggg acaccaacga ctatttgtcg
    94261 aaatctggct gtaaatgcat aggtccgatc ttatatattc ataccagtcg atgtcgttgt
    94321 agcgacattc cggtttttaa gttttctatt atgaaagatt actatgcttc acacgtgttc
    94381 agaggtttat tatctctgaa agagtggaat acacatctac cgaatgtatt gtgtacgtgt
    94441 gagttgtcga tgagcgatag atatgtggcg acagtgtatc ctaagcagaa ttctatttat
    94501 ctagaatact atccgtattt tttgtgctac ctgtgtcgcc atcttactgt cattgagatt
    94561 gagcagtgta caaatgattt aatttcgctt cttggcccta aagtagctca gcgagtcata
    94621 attcatttta aactgctttt tggttttcgt cacaagccgc atattggtac tgttgattcg
    94681 tggttctggg aaaatttttt tatgttagaa ttgcataagc tttggttaac cgtagtcaaa
    94741 cataatcggg tgacgacaga tttttttaat gtagtctacg agaaaattca aaactataaa
    94801 caatacgcaa tcaagaccct gaggatgtcg tctaaggcgg ttcctgcaat acagaggttg
    94861 tgtttggcaa aatttaagca gcaactgttg tatctaaata ttaaggttac ggtaaaaaaa
    94921 aataagcgag aaatgtgttt gaatggcttt gtttacggta aaacattgta tgtcgttgaa
    94981 tcttctcagt taatcttccg gaatttgctt ctgttgtatt acgattacag tttgccggac
    95041 gaatgcaaga caaacgaaga aaacgttttg acggctcatt acatacgagt aatttcgaga
    95101 ttgtcgttta agcggtctcg gagtgcgctc ccgccaggcg tgagaccaga ttttatcttt
    95161 gtggcacaac agcctaaacg taaagagtta cctaatgttc ccggtggtat cgattttgct
    95221 gaaattacct cagtgaggca tggcgcggta actcttaacg cgtttaatac gaacaaagtc
    95281 atgaatttaa aagcaaccat ttcaaaaagg gctaactttg tatatcatcg cattcctaag
    95341 acgatgaccc acagttttgt catgtacaag catacgttta aagaacctgc gtttaccgta
    95401 agcacgtttg tttcaaacga tgatttagat atgagttcgt tgaatatcaa catacgtgga
    95461 ccttactgcg actttttata tgctttaggc gtttataaga tgcatgtttc tatccgagat
    95521 ttatttttac cggcgttcgt ttgcaatagc aataattcag tggatttaca gggactggaa
    95581 aatcaggatg ttgtgagaaa tagaaagaaa aaggtgtatt ggatcactaa ctttccgtgc
    95641 atgatttcta atgctaacaa agtgaatgtg ggatggttta aagcaggaac gggtattatt
    95701 cctcgggtgt ctggggagga ccttcaaaat gttttgcttc aggaattaaa taacgttcga
    95761 gagattcccg ggttagtctt tgatatggat ttgcatcaac tgcttgtttt actggaacaa
    95821 cgaaatctac atcaaattcc gtttctcgtt aaacagtttc ttattttttt acgtctcggt
    95881 ctgttaatgg gttacgggca ctctcggcgc aacaaggtgc atgatatcat gttacattta
    95941 atttcgaatg gtctgtttga ttttaataag aactccgtag caaatacaaa aatcaaacac
    96001 gggtgtgcgt tggttgggac gcggctcgcc aacaatgttc cgaaaatcat tgctaggcag
    96061 aagaaaatga agctagatca catgggacga aatgctaatt cgctcgccgt gttgcgtttt
    96121 atcgttaaaa gtggggaaca gaaaaataaa actgttttca ttaaattgtt ggaatattta
    96181 gcggaaacct caactgccat aaatacgcgg aatgaagtcg ccagattact tcagactctg
    96241 acggctaagg tgaaaacatg aatgtactcg tggccgacga atggttcgat tgcgcgatta
    96301 ggttagattc ggaaaccata gctgtccatg agattttcaa tccggagtta agtaaactgc
    96361 ttaacttgca ctcgaaaaca gtctacatgt ccgacctatg cgcttttatt tctggttgtg
    96421 ttaatcggaa tgtcggtaaa cttaccatat attggcatgt gaacggggac ataatctacg
    96481 cattgactgg tattttacat tgtgtaaaaa taaagataga gtgcggggag agaattgccg
    96541 atggtcgata tagattatac gaaattccta aattattttt aatgagagga cagtcaacac
    96601 ccatggaatt gaagtggaag cacgccgtgg gtatcgcgac gacgaataag cctttgctga
    96661 cgcacgtttt aacagatgtg ttggaaacat ctccttttac cttgccagat acgcttctgt
    96721 cggtgcagga gttgtctatt ttcagagaga gattgtcgta catttactgt gtgctgggat
    96781 cagatgttga tatcgtagcg cggacagaga gagagatttt tcaaaaatgt gcagaactag
    96841 ctcgcctaca gcaagtgttc cttattcaag gaaatattat ggaaaacttt gtcctcgtcc
    96901 aggcttgtct atttcagctg ggggctgatg gtttgtggga agagatatct ggttctgtac
    96961 gtcctaggcc ggagttgatg tccagtgcgt tcattcaaca cagagtaatg ttgaataatt
    97021 gttattgtat cgctgtcatc ttcaatgcca tttacaaaca caaactttcc ctgcctaccg
    97081 tagaaagaag ccacgaaacc gttaatcgtg tagttcagga atattataag tcttatgtga
    97141 atgctcctct ctctgttctt gtgtgtgcga ctaaggtgct tactttgttt acagaagaat
    97201 ataactttaa gtcagctctc gtatttgtca gtcagttttt ccaggtggac gtcgaggctt
    97261 cgagagcgga tgtgattcgt ctgtttttag cgtgtctaaa gggtgattaa atctctcgga
    97321 aagaggctga actgtttcca gagcatacat aaatcgccat aattatagcg ataattaagt
    97381 cgtcggaaca ggcttgtttt ttagcgctgt atgttatgta attgttaacg gagatctggt
    97441 gaatgtttct gatttgttct agtgcgtatt ccacgggatc gtaggtaatt tttattgtaa
    97501 acgatatcaa ttcctgtgac gccttgatgt ttcctgaatt aaaattcgag ataaaaaact
    97561 caactgctag ttttttttct ttaccgagta ggtaaaatgg ctgtgctatc tgattttggt
    97621 ctggggtgtg gaaaaaagtc acctgtatag atttattagc cgtgatgttt tcctttatga
    97681 tacatgcaat ttttacggca gaagcttgat tggaattccc ttctatgatg atttttactt
    97741 ccgtgaagaa aggatgtaaa tctaggattg acaatatcat atgcgcggca cattcagcta
    97801 ttgccgtgtc ggaacttgtc attaaacttt ctagaaagta gtgctccatg ccgtagacga
    97861 tatattgatc tagataggtg cctattgctg ctatgcctgt gccagaagca cggcggttgc
    97921 ctgtataggc agggtctagg tatacgtaca gatctttacc taaaaaggga attagatttt
    97981 tattgatggt gctgtatcgg aaaaactcga attcggtttg gccttgttcc gtaattaaaa
    98041 cgtcgttgat cacattgcaa gtggctccgc ccatgatttc atggatgaaa gctccttcta
    98101 ggaagaggtt ggccgttttt ttaacttcgg cgttaatgct gatgaacttg ggtttgtgga
    98161 gtcggtagca agaacaggct gtggcgttac cgcgctcgtt taacatatgg gcgtgatctt
    98221 cgcatacgta agaaactacg gagagcattt caaacggaga gttgttcagc ttcattaaaa
    98281 aagatgttga atggtttccg gaattggtcg aagatataaa taggatcttg gtagatgctt
    98341 ggggcaggaa acctaaaatc gtgctgaacg cgtctttctt tataaagtgg ctctcgtcga
    98401 caataagcag attgaagctc tgtccgcgta tactctgaga ggggaatgaa ttcggcgtta
    98461 aacgacataa aagacgattt tgagaactgt gaaacgaaag acgacctttt taaaataatt
    98521 gataaaataa tcaaaaattg cgattttata gtggaacagg tcgagtcttt gcctcggagg
    98581 gtggattcag cggccatcct atttgataat ctcgcggtgg agatatttaa cgatgtaata
    98641 tatcgacaaa atggagttgc cgcgaaaata cgacagggta acgggcagga tattgacaca
    98701 taagaataac cagatgtgta caaccgaatg ttctcagatg tataatttac acaatcctat
    98761 cacgtttgag ttgggacttg gaaacgtgtt tgtctgtatg cggtgtttga cggttcacca
    98821 ctgtgatatg caaactgact gtaccattgt caacacgcat gaggggtatg tttgtgcaaa
    98881 aacgggttta ttttatagcg gttggatgcc tgcatatgcc gactgcttct tagaaccaat
    98941 ctgtgagccg aatattgaaa ctgttaatgt cgtggtggtc ttgttatctt atgtatatag
    99001 ttttttgatg gaaaacaagg aacgttatgc tgccattatt gatagcatta ttaaagatgg
    99061 gaaatttata aaaaacgtgg aagacgctgt gttttatact tttaacgcgg tttttactaa
    99121 ctcaactttc aataagattc ctctgacgac gataagtcgg ctttttgttc agttgattat
    99181 aggaggacac gctaaaggaa cgatttatga cagtaatgta attcgcgtca gtcgtcggaa
    99241 acgagaagac agtttactaa aaaagatgag attggagtat ggaaacgcac ttatactatg
    99301 acaccctgta tcaatatcaa ggcggagtgt atccggctca tatttgcctg ccgacagatg
    99361 tgtgtcttcc gatgagagtg gattgtatcg agtctttata ttttcggtgt gtatttttta
    99421 agaatgggat gcattatact gaatggagta aattaaagtt tactgtgatt tcacgtgaaa
    99481 taaagtttaa agatgtgtta aaggatgcgg actctgacga agtttttacc ggtttggtgg
    99541 taatgactat cccaattccg atagtagatt ttcattttga tatcgattct gtaattttga
    99601 aattggttta tccgcggtta gtgcaccggg aaatagtgct gagactctac gatcttatat
    99661 gcgtcagacc tccgtcagac cggccgtcgg aagcatcagc taaaaatatt gctaatgatt
    99721 tctatcaact aacctcacat ggaaataaac agacacccga tgaggaaaaa cgttgtctat
    99781 tttttcagca gggaccttta gagccaccct ctaccgtcag aggcttaaag gcgcccggta
    99841 atgaaaagcc aatacaattt cccgcccatg ctaacgaaaa aatgaccgaa tcttttttaa
    99901 gcgatagttg gttcggacaa aaagtcactt gcaaaaaaat tttggatttt acgcaaacgt
    99961 atcaagtcgt ggtatgttgg tacgagcttt cgttttcccg cgagatgcag atccagaata
   100021 atttactgtc cgcttcccag ctaaagcggg ttaacgctgc ggatttttgg gatagaacta
   100081 atcggtattt gcgagatatt ggaagcaggg tattgacaca catcgtgaaa acgcttcaga
   100141 ttcataatag gcaatttaaa cagaaattta attgcaattt tccagataat ttcagctttg
   100201 atcgtctatt atcatttatg cagctcggga aagatttttg gattttaaac ttaactttag
   100261 acagctgcat tattaaggca attatctgtt tcctaggttt tcaaaacggt ggaaaatctt
   100321 ttttagccca agatgaagtt tggggggatt taatagactg ttctaaagga tcggtgatct
   100381 acggggaaaa gatccaatgg attttggact cgactaacaa tttatattcg acgtgtcggg
   100441 aaaaacagaa taagtcgtgg gaattatatg ttgattgctg tgctttgtat gtatctgaaa
   100501 agttagagtt ggattttgtg ctacccggcg gatttgcaat caccggtaaa ttcgcgctta
   100561 ctgatggcga tatcgacttt ttcaattggc gatttgggtt atcttagaaa ttttctgcag
   100621 aatgaatgta actggttcag aatttgtaaa aaaacattct atcgcgaata tcgtagcgtt
   100681 gcgacatcgt ctcctacatt ctcgttgaat aataagccta agaaattttg catgcattgc
   100741 gagattgtaa tactcaagcg aagtgaagaa tttatgttca gccttgcggt aaatggcata
   100801 cattttgggc agtttttaac cggaaaaatg aaatttaata agaaagcagt tccggaaggg
   100861 ctctattact atatattgga attgggaagc ataaccccta tcgatttggg ctttattccg
   100921 agatataatt ccgactgtgt tacaaacatg cgttgtgtta caccggaggt tatttatgaa
   100981 aattgctcta ttgtgtgtcc cgaagaggca aatcgcctca cggtaaaagg gtccggggac
   101041 aataaattga ctcccttagg tgggtgtgga gcatggtgtc tgaaaaatgg tggcgatctg
   101101 tatatctata cttttgcact cgcttacgat cttttcctaa cttgttatga caaatccacc
   101161 tttccatctc tggcgaaaat tatttttgat atgatagctt gcgaatccga agattgtgtc
   101221 ttttgtaaag atcacaacaa acatgtatcg caagctggac agattgtagg gtgcgtctct
   101281 aatcaagaaa cctgtttttg ctacacatcg tgtaagaaaa aaatggctaa tattaacaat
   101341 ccggagttaa tctctctgct ctgtgatcag gaaatcaata agatagatat tatgtatccc
   101401 aaaataaaag catcgttatc actggacatt aattcttacg ctcatgggta cttcggtgac
   101461 gacccttatg cgttaaaatg tgttaattgg ataccagtca ggatcagcgc agctctgagc
   101521 aggctgattg ttttgtcgtg tcctgtgtgt aagcgtgtgg taatggacta attgtgtgtt
   101581 gttttatgta ttaatttttt atttctgaaa ataaagttaa attaatagta cttacgtgtg
   101641 tattgtagca gctggcgaaa agtgctgtgc tctttatatt ttgatggtcg attgtaatta
   101701 cattatccag gcatgtgatt gtcttttctg gaaacattcg gcggcattta aactcgactt
   101761 ctttcatcac aaagtgagat acgtgttttt gatgtgccac gtaaccgatg ctgattcctt
   101821 caatgttctt caataaaaaa cttataatag gaactatgaa ccacgttttt ccatgtcttc
   101881 ttgggactag gaatacgtta gttttttgtt tcagcgtatt cagagtactt tcgtttacga
   101941 attcaatgtc gaacacgtgg gtcagatagt tgataacacg attggctaaa gctggaagtt
   102001 tggtaacggc gatgaagaag attacatgta tgagaatgtt cttctgaaat ggttccagtt
   102061 gtattttgcg cgtgtctcca aagtcgttga attctccttt gatccatttt ctgaaatctt
   102121 tgataaaacc gtctatttgc aagaacagcg gttcacgata tagaatctta aaggattcaa
   102181 gaaattccgt gtattgtgat tcaaaggatt tgtcggaagc gggtaaaaac ttcatttctt
   102241 gtagcttgtg cgaaaggctc ggtagtatag taagaggctt acggttttta agatgtcgct
   102301 gtttttcaca aaatgtatat agaggtttta cctgttggtt atatgaatgg gcaaagccga
   102361 gttctggcgt gagcattata aaacgcttct tatagaagat ggcactgttg gggtacttgg
   102421 tagatattgt cgagcagtct ctttcgcctt tccatatgat cgcttcatag ttatttttta
   102481 tgtgggttat gtcgcaggta cgtagcatgg agcccgacct tacgttggcg gcggtctatc
   102541 aggcggcggc gaacctcaca gagcaagata aggagatttt tgccgaagcg gtaaaaactg
   102601 cgttttcagt gtgtagttcg gcagccccga gcgctaggtt gaggatgatt gaaacgccta
   102661 cacagaattt tatgtttgtg acgagcgtta ttccttcggg tgtgacgtct ggtgaaaaaa
   102721 aaacaaagtt aaatatcgat gccgctctgg ataatttggc tttgtcgttt gcgaacaaaa
   102781 aatcaaagaa gatggctaga acgtatttgc tgcagaacgt tttgcggact caagatcaac
   102841 aagttgccat ttcggggaag tacattttgt atacaaaaaa acacattgaa acgtctttga
   102901 tgatcgataa gacaaagtta gttaaaaaaa ttctcgagta tgccgagacc cctaatctgt
   102961 taggatatac cgatgtgcgt gatcttgaat gtttactttg gttagtgttt tgtggtccta
   103021 aaagtttttg ccagtcagac agttgtttcg gatacagtaa gacgggatat aatgccgcgt
   103081 ttccaaatct attgcctccg tatctttacg aatgcggcca aaataatgga ctgttttttg
   103141 gcattgtgca agcttacgtg ttttcttggt actcagattt tgatttttcg gcgcttgaga
   103201 tttcagaacg cgctcgtcgt cgaatcaggt cactcctgta cgacttaaaa cagaagtttg
   103261 cggagcaaga agtttctgtt ttaccggtag cgtcacagat gtgtatcttt tgtgcattat
   103321 ataaacaaaa caaacttagt ctagaatacg tttctggtga cttaaagact tctgttttta
   103381 gtccaattat aataaaggat tgtttatgcg cgcagacgac aatttctaca actcagatgc
   103441 tgccaggtac aaagagctca gccatatttc cggtatatga ccttcgtaag ctgctcggtg
   103501 cgcttgtcat ttcggaaggt agtgtcaagt tcgacatata atgtctttga aggactatct
   103561 gagacagtcc atttctaaag atttggaggt gagacatcga gattctttaa agattagatt
   103621 aggggagaga catccattaa gtgtgcatca gcatatgatc gccgctaggc agatcatcaa
   103681 atcggacaat gcagaacaac agcatgtaat atcttctttg agtggttttt tggataggca
   103741 gaagagtttt ttaagagtgc aacaaaaagc tttaaagcag ctagagaaat tggacgtcga
   103801 cgaaataatt gatacggcag cggaagtgaa agcagtcagt aatgatataa aagaaactct
   103861 tatagcaagc actgaattag aataattatg gacaacggtg tggagacacc tcagggtcaa
   103921 aaaactcagc cgataaattt gccaccagtc aggaaaaagt taagaaaaca tgagggactc
   103981 ggaaaaggtg ttaaacgaaa actttttgct gaagatagct ctcccttaaa gaaacagatt
   104041 tccgcctgca gtgatatgga aacactttct tcgcctgtaa agtctgaatg cgagtcgcga
   104101 agtgcttctc tcgatgaaag tttcggaaat tgtaaacacg aaattgcttg cgattgttct
   104161 gcgatagagg aattgctttg tcacgagtcg cttctagact cgccgatgaa actatcgaat
   104221 gcccacacca tcttcagctc aaacaaatgg aaactggagc tagagaaaat tatagcttca
   104281 aagcagattt ttctagacat gagtgagaat gctgaacttg cggcctacgg cgaaactttg
   104341 tgtaacctga gaattttcga aaagatcagc tcgccgtttt tgtttgatgt gcaaagcgaa
   104401 gagcgttcgt attcagtggt ctacgtccct cacaacaaag aactctgtgg acagttttgt
   104461 caacctgaga aaactatggc tcgagttctc ggagtgggtg cttacgggaa ggtgtttgat
   104521 ctagataaag tggccataaa gacggccaat gaagatgaga gtgtcatttc ggctttcata
   104581 gctggtgtca tccgtgcaaa atcaggagcc gacttattat ctcacgagtg tgttattaat
   104641 aacctattga tttcaaattc cgtttgtatg agtcataaag tgtctttgtc acgtacttat
   104701 gatattgatc tccataagtt cgaagattgg gatgtcagga atgtaatgaa ttactacagt
   104761 gtgttttgta agttagctga tgctgtaagg tttctaaatc tgaaatgtag aattaatcat
   104821 ttcgatatct cacctatgaa tatattttta aatcataaaa aagagatcat ctttgatgcc
   104881 gtgttggcgg attacagctt gtccgagatg catcccaatt ataacggcac gtgtgctatt
   104941 gctaaagagt atgacaaaaa tcttcaactt gtgccaatta gtcgtaacaa attctgtgac
   105001 atgtttaatc ctggatttcg accacttgtc gccaatgcaa tgatattggt caatgtgtgc
   105061 ggggcttttg atggtgaaaa taatcctctt agacactgta acttggatct gtgtgctttt
   105121 gcccaggttg tattatcgtg tgtgctaaga atgacggata aacgtggatg ccgcgaagct
   105181 cagttatact acgagaaaag gttgtttgcc ttggctaacg aggcctgtcg attgaatcct
   105241 ctcaaatatc catttgctta cagggatgct tgctgtaaag tattggctga gcatgtagta
   105301 ttactagggt tattgtttta ccgagacgtg gttgagatat atgaaaaact atacgatttt
   105361 ctagatgaga gaggggaatt tgggtcacga gacctttttg aggcaacttt tttaaataat
   105421 agtaaactta ccagacgtca gccaatcaga gagggtctcg cgtctctaca gtcgtccgag
   105481 tatggagaaa aacttttaca tgaccttaga gagttgttct tgatcaattc tactgcggat
   105541 ctggataaag atacatcatc tctctttcat atgtgatata gtaatggatc ttgatcaaat
   105601 atctgaaaca ctgagttctg tggccgaaga agagccttta accatgtttt tacttgataa
   105661 actgtatgca atacgggaaa agatcaagca agttccattt tcgattgttc gcttgtgtca
   105721 tgtttactgc atgctaataa aatataacgc ttctaacaat aattgcattt tgggccgtaa
   105781 acttattgag gaaatgcagc agtttttgtg cggcacaaga gtggatggat cggaagacat
   105841 ttctatggat ctgagtgaat tgtgcaagct gtatgattac tgtccattat tgtgttctgc
   105901 tctgtgtcgt gcgccttgtg tatctgtgaa caagttattt aaaatcgtag agcgtgaaac
   105961 tcgggggcag tcggaaaatc ccctctggca cgcgttacgg aaatataccg tgacggcgac
   106021 taagttgtat gacatctata cgacaagaag ttttttagag tataaaggac agcagttttt
   106081 tggggaagcg gtgatttacg gcgcgaaaca tgagcgtgtt attagacacc tcgtagcgac
   106141 cttttacgtt aaaagggaag ttaaggaaac gttgggattg ctgcttgatc cttcttctgg
   106201 agtttttggt gcgtctctag acgcgtgttt tggaatttca ttcaatgagg atggattcct
   106261 gatggttaag gaaaaagcgc tgatttttga gattaaattc aaatacaaat atttacggga
   106321 taaagaagat cactttgttt ctgaactatt aaaaaacccc acggagaaat ccttttcgga
   106381 ttttatttta tctcatccgg tgcctgtcat agagtttcga gaaagaggga agattccgtc
   106441 atctagagaa tatttaatga cgtatgattt tcaatatcgt cctcagagaa agttgcgtac
   106501 ttgccccact ccagctattt tggcacctca tatcaaacaa ctgctgtgtt tgaacgaaac
   106561 acagaagtct acggtaatcg tttttgattg taagagcgac ttgtgtgagc agaagctgtc
   106621 tgtgtttcag aaggctgtgt ttactgtgaa tgtattcgta aatccgaaac acaggtattt
   106681 ttttcagagt ctgttacaac aatatgtaat gactcagttt tatattaatg atcataataa
   106741 tccagaatat atcgaaagta cggaagtgcc ttctgttcac attgtgacgg ctttcttcag
   106801 gagaagaaca gaggaagaaa ggagtttgca tttggtgatt gatgagacgg aatatataga
   106861 agaagaaata cctttggcct tgattgtgac tccggtagca ccgaatccgg aatttacttg
   106921 ttgtgttata aaagacatat gcaatctgtg ggaaaataat atttgcaagc agaccagttt
   106981 acaggtatgg gcgcaaagtg ctgtaaacca gtatcttgcg gcatgtgtaa gaaaaccgaa
   107041 aacaccttga ttgattacaa gggaaatcct atatcactag cggatgaatt tactgtttta
   107101 accgataccg aatcggaaga ggaagggatg gcagatcttg aaaagccctt acttgaaaaa
   107161 gtagttgcta agtgtgatac ggaagctgaa aaaaaattgc cttgtaaatc aaaaaaatga
   107221 tagacgacgc agatttacgg cacgctcgtt tttttttatt ttttggctat ttgacaataa
   107281 acatgattgt aataaagtgt cactcgtttt catccattag gctcgagctt tcagtattaa
   107341 gtagttgctt gtaccgacgc ttctttttaa ctaggtagcg tacaagtcga caaattataa
   107401 aaccgatcga aattatggcg atgaccgcta aattgataat aagtcctgtg ctccactcgg
   107461 attcaaagaa agtttcgtac tggagaatag gaaaagatag gcctacggcg ccacaaaaca
   107521 taccgacgta atagccgaac aagggtttaa cgtagcgaac caggacggct tctattacta
   107581 tactatatat gcaagccatg acaagaaagg tattgatgga agagtaagca acggttatgg
   107641 aacgtatgta gatactattt ccgacgccca ggcaagtagt aatgccgaga aacattgtag
   107701 agtaacctag catgagttcg gttagattga taacaacggt cttgaattgt acggtcccct
   107761 ttaggttagg atgaattttc tgaaaggcga aaaatgactt acccgctgat tgaaattgcg
   107821 ttatcagcgt aacgttaaag gtggtgaaac acacgaagaa gatgcaatag gcaaatgcgc
   107881 ctagggctac cagtctgaaa gacaaggcgg tgacgaataa ttgaaatgta tccatgatta
   107941 agatgaattg aaagcaggat gacgtgtccc ccatccaggt aatatccctc gttgtttggt
   108001 taacgttaga tgttttgtta gaggagaaca cttttgcaca gcagacaatg taataaataa
   108061 taatcaggag gaataacata gccattatca gtacgtagca tataatctgc acggggttta
   108121 tgtaaagttg atgcgtcatc tgatatattt gattgttagc ggagagatta accgctttga
   108181 ggtcattaat ttcaaagtag gcgcacggaa atcctaaatt tggaaagttt atggctatca
   108241 gatggaccgt gacgtttatg aatgacaagg ctgcacagat tatagagacc agccagatcc
   108301 gtaaattaat ggtgtctaca cgactggagg ccataccagc tctgtgatgg agaacaggtt
   108361 tcagaacgat actctgttct cagagtggtt cggtcagagt ttgtccgatg taagatttcc
   108421 ggacaatgtc accgtttatt ctcaagccga ctcggcggtg agttttgaaa acgtcaggca
   108481 gccgataaaa ctggttcgcg cagcgatggg ttcaggaaaa acaacagcct tgattcattt
   108541 tttgaaacag gtacccaggg aactatctgt ccttttgatt tcttgccgta aaacgttcgc
   108601 tgctgaaatt ttgcaccgtt ttactctcaa tgggttgaag gattttgaat tatattgcga
   108661 tattacggag cggcagataa acaacagaaa agtcattgtc cagatagaaa gcttgcatcg
   108721 tcttacagaa aattacgatg ttttaatatt agatgaaatt atgtcgatta taaagcagtt
   108781 ttattccaaa acgatgacaa aaaccaaaga agttgattgt aagtttttat cgctgatcaa
   108841 aaattccagt catgtaatag ccatggatgc gacgctgact cggcatgtgg tggagttttt
   108901 tgccgcgttc aagccagata ctcaaatcgc cctcatcaga aatacatttg tgtccgcgat
   108961 gttttccaat aggatcgctt acttttgtga cacgtttttt ggtaaagagt tttctttttt
   109021 tgcacgcttg gaagacaagc tacgatggga taagaaattg tgtttgtttt gcagcaccgt
   109081 gttggcagcg gaatacatgc atgatttgat acggtctcgg tttccactca aaaaagttct
   109141 cttgttgacg tctaaacaag ggaaatgctc ttccatagaa tcgtggatac ggtatgacgt
   109201 agtgatttat acgtccgtcg tgactgtcgg tctcagtttc gaaccggttt atttcagctc
   109261 tttgtttgtt tacattcagt tggccaaagg agggccggac atggtttcaa tatttcaatc
   109321 cattggtcgt gtgaggcgag ttatcgatga agatatatac atttacatga atcccgtatt
   109381 aattagaagc tatgatcctt tggcacctat tgccatacct ccgtgcagtg attggagtgt
   109441 cgctgagcag tctatcatct cagagagttg catcgacttc cgcggaaagt gcagcggagc
   109501 gcataaatat aatttctgtt ccgtactgaa gtctcttttt cggtacaggc attatatcga
   109561 aaagactact attacaagtt tatctgatag tttatttctg ctatgcagtc tgttatgtga
   109621 gaattctatt aaggtggaca tcgttggaaa tggattcccg atgcgcaaag aggtttttct
   109681 gagtttcttg cagattctag ttgaggagtg tcattttatc gaaaagaaga ttactttgcc
   109741 gggtgacgac atgacgttcc aagagattat aagtagcaga gaaactatca tgaacgggga
   109801 tttttatgaa aacggtgatc aactattaca taaggactat attactgaca tgggaaaatt
   109861 cagagcgact ttcttatctc cgggcgttga cattttcatc gcatcggaca ttgtatatga
   109921 tctaaaaaat gaaagcaaac gctatgtttt tgtgaacgtc tggttgcaaa aatgtgtatc
   109981 tgccggtgtg gaaagcacgg aaatcgaaag agttttttgt gagcggatta agtgctatat
   110041 gctgccgaag agttttctgt gcgacgagta ctttgttcta ggtgacattt ctggggttta
   110101 cgagtgggga atgttaatag atctggcctt cctggcggaa atgatccgaa aagatttgaa
   110161 actgaaatcg tgcacggata ctactactga catttctgaa gatgatctcc ttctgtgtgc
   110221 ggccaggagg tcaagtgaca tcttacaaat aatgcaatta gtgtttacgg tgcatgtgca
   110281 attttttcaa aaatacagtc tgcagactct gcagcttttt aacaagttga gaggcatgcg
   110341 gattgtgacg ggtgtgttct ctatagaaaa attcagcatt tccatcctca ggcttttctt
   110401 taaatgtgca tttaatatga ctctgtccgc cagcagacct cggtacattc ccgggaaggc
   110461 gtatcgcaat ctaacaaaaa atgatatgga gaacatgcta gacaattggg agatttcgcg
   110521 caccaatctt aagacttgca aagaactacg taaagccctc accgaggcct cgagagcaag
   110581 gcggaaacaa acaatttata aactgcaagg ctcggatata agcctctccg ttagtgaagt
   110641 tggagttttc gggcaacatg catttccggg ggtgtgcgtg tcatcttagc ctttattgtg
   110701 tgtacaatga ctgggagaat aagatctaca gagtaccgat ttttcagtgt ctgtttttag
   110761 aagcggagac tcgttcgtta aaaacgtttt tgattagggg acagagccta gaccaagaat
   110821 cgttaaatga gatagaagtt acaagaaaag aaacaatgct ttgggacctt caggaacaaa
   110881 gtaatatgat ggacaaaaaa atagcagcaa tcagcaacct cattatgaat aacggagagc
   110941 ttgttaggaa actttcaaaa tttttcgtgc ctctaaccgt tgttcttgga gatgacgggt
   111001 tagagatttt ggaagcatac gtctgtggcg aggaactcat gttgcctctg gacacggtac
   111061 ctgttatctt acggtgtatc ggagactacg cggccttgga cacgaagcat cttttgagta
   111121 acgaatgtac acaggcttcc aaaaaaattc gctttggata cagtgtgatg gattttcact
   111181 tttcgctgac tgtgtctgac gtgaaaattt gtttttcaca cacggacacc ggtgaggccg
   111241 tatgtgaaaa aatgaaacaa attttttctt tttctgtgtg tgctttcggc ggtgagcaag
   111301 ttctcttagt gacgccaaaa aatgcttatg ccttattgtt cgacgatgat ttgtgtttgc
   111361 ttttactgca gagcgtgttt gctttcctgc acgagaagat attcggagtt tataaacagg
   111421 tgttagttca gctttgtgaa tacatcggtc ccgacttatg gccctttggg aatgaaagat
   111481 cagtttcttt tataggatat ccaaatctgt ggcttttgtc tgtatcggac ttagaaaggc
   111541 gggttccgga tacaacttat atctgtcgcg aaattctctc attttgcggt ttggcgccta
   111601 tcctgggacc tcgtggtaga cacgtggtcc ccgtagtcag ggagctaaat attgaaatgc
   111661 ctggaagtga aacttctttg cagcgtttca ggttcaatag tcagtatgtt tcaagcgagt
   111721 ccctgtgttt tcagacaggt cccgaggaca cacatctatt ctttagtgac agtgatatgt
   111781 atgtagtgac tttgccagat tgtctgaggc tattattgaa gtccacggtt cctaaggcct
   111841 ttttaccatg ttttgatgaa aacgccacgg aaatcgatct gcttttaaaa tttatgtcaa
   111901 ggctgcaaca cagatcgtac gctttattcg atgcggtgat ctttatgtta gatgcttttg
   111961 tttccgcttt tcagcgagca tgtaccctaa tgggaatgcg atggctgtta gtgcgggact
   112021 tacacatgtt ttatttaacc tgtgatggta aagatacaca tgttgtcatg cctttactgc
   112081 aaacggccgt agaaaactgt tgggaaaaaa ctacggaaat caaacaaaga cctacatttc
   112141 agtgtgcgga aatttcgcgc tgtggattta tcgtctacgc cagatttttt ttgagcagtg
   112201 ggttgtcaca atctaaagaa gcgcactgga cagtaacggc gagtaaatat ttatctgcat
   112261 gtattcggac caataagaca ggtctttgct ttgccagtat aactgtttat tttcaggata
   112321 tgatgtgtgt ttttatagct aataggtata atgtttctta ttggatcgaa gagttcgatc
   112381 ctaatgatta ttgtctggaa tatcatgaag gacttctgga ctgcagtaga tatacggccg
   112441 tgatgtctga agatggacag cttgtgagac aagcacgtgg aattgcgttg actgacaaaa
   112501 taaacttttc ttattacatt ctcgttacac tgagagtgtt gaggagatgg gtggagagta
   112561 aatttgaaga cgttgaacag acacagttta ttaggtggga aaacaggatg ctctgtgaac
   112621 acattcattt actgcatttg aattaacttt atttctttac ataacataga aaaatgagac
   112681 ttagctagat gtgtctccat tcttcgaata aaaagtttgt gcgaattgtg ttgctagttg
   112741 tatgacttgg agagaactgt cttgcagctg tctagattct aatgataaat tgatgaaatt
   112801 gtgactacgt tttgtgttaa aataaagttc caaaacttct atatgcgtgt ttttcatttc
   112861 attgtatagt ctaatcatca gaggcacctt gtggaggatt tctgaggcgt gttcgttaaa
   112921 aaaaatgtgt cttagtgtac aaaccaacgt gtcacacgtg ttaaataata ttttcgttat
   112981 cggagatagg gctggaaaga gaacgagctt agcgattagt ttgtgtaggg tgctttgctt
   113041 cagtggaaga ttttctaatg cgaacactag tccgcaaagc ataaattctt ctggcgtatc
   113101 aactttcata tggattagtc tgcgtttgaa ctgaaaggga ttgagtcgca gttcttgcag
   113161 tgtatcttcc gagtctagta ttatgatgcc gatgaagcct tgaaatccca attctttttc
   113221 gcagatggtc ttgtactcca ggccgttgat catggttccg tcttccaagt ggaaccatat
   113281 tccgtcatct cctactgtta tatttactaa cggatgtcgt gcgagtgata tacacttatc
   113341 aatcttgatc acctttagga tagttcggac gtgtaagatg ttgaatacgt ctgaggtttc
   113401 taattctttt aattttttca aggatttcat tctccgggtt tggggagaaa atgttcgaat
   113461 cgaaaatcgg ttcgctgttt tcggggtgcg tttgggttaa attaaacact tctgatatct
   113521 gatttagctc tcggacgtat acgagtctta aataatgctt gattttgctg ctttcgtaga
   113581 tggctaataa gatttcaccg agggatagaa agagaaattc ttcgggaatc gattcgaggt
   113641 tgtaaatgtt taagaatcgc cttaggaaag gcacgatgag cagctcgatg ctatagttag
   113701 agtatgtgat actttcttcc tgtccttgat tattaacgtt ttttcttaac cggaaggttc
   113761 gcatgtattc catttcccat agctggtcta ttcgtttgtc ggcatattgc gtgtctggga
   113821 tatactgtga aaaaaaactg ttcgcgactg atcgggtgtc atctatggaa acgctagtga
   113881 atgggagcct ttgaactatg tttagcgctc gagataaaga gagattctcg aggtcatggt
   113941 ccagattcgg gttatagcga tcacaatcgt tattcgtctc gagcaaggag tgtagatcct
   114001 tgattttcct ttcgaacatt tggtttgttg ttttaagtgt ttcgatttca tccatctgtg
   114061 tttgtatctg ctcctccatg cacttgatga tttgtttttt gaacagatct cgaacgtctc
   114121 tctctcctgt gtcgatcgca gagcgttttc ggaactgtcc tcggttaaac atgagtttat
   114181 tttggtctat tatagaggga gtgatttctt gaataaatcc ttcaacgctg tccctaatgc
   114241 ctattttaga tttgctgtcc gataagttga gtaaaaattt gattaaactt tttttcgcgt
   114301 cgctgctttt ctcttctttt tctatcatat ccattatctt tttgttggtt acatctgtct
   114361 ttgctgtggt tagcaccttt atgggaaatg tattcaataa ttggcacatt ttttgatgac
   114421 gccgcagact attgtgtttt tttagttctg gagaaaggtg tgcgaggggc gtagtcagca
   114481 ttaagcgatt tctaataaca tatggggtgc tgtacgtgaa aaacgctata gccttcttgt
   114541 ttttaaaaca agaaatctgc tccgaatttc ggtctcggaa aatcttaata ttgtgaaaat
   114601 ccggaatgat cacggaagat agacccagta aaacgggagt tacaatgttt tgtttatgcc
   114661 gcactatgtc gtggattagt ttagatgaca cttgttgtag gagattgtat aagttcgggg
   114721 ccgtaggggt ggttctcatg aacggaacga ttcctacagt acagatccag tctacatatc
   114781 tgttatagtg actgttgtct atgctctgaa gaataaaatt aattatatta gatatatcac
   114841 ccaagatcac ctgtttaatc gcgtgggccc atacgctaaa ataatcttga aatgacaatt
   114901 ttttgttgtg gaacggaaat gacctcacat gacgtttcca ttcatcgtgg atttgttgaa
   114961 tggaaacgct gtttaaaagg gcttgcgcta ctccataggc tatttgtttt ttcagtacgg
   115021 cggaatctcg gagagcgttg tggattgtct gacctttgaa aaaatttttg tgtccgtgta
   115081 gcatttcaat aaaagtcatt atctgctccg agggataaat catgtctatc tcttcgttgt
   115141 tcggaggtag atacgataat aagtttttgc ttaacatgtc ttcggctccc aaaatagagt
   115201 tgattgtaga taaggtggct tcgttatcag aaagacgctt ggaggggcgc ctgccggaag
   115261 attggtttcg ccacatcatg gatcccgaaa ccgagttcaa cagcgaattt gctgatgctc
   115321 tgtgcatcgg tattgatgaa ttcgctcaac ctctgccttt tttgccgttt aaggccttgt
   115381 tagtaaccgg tacggccggg gcggggaaaa cgaacagcat tcagacctta gcggccaact
   115441 tagattgcat cgttactgca acgacatcta tcgccgctca gaatttgagc gttgttttaa
   115501 atagaagtaa atccgcgcaa gttaaaacaa tttttaagac ttttgggttt aatagttcac
   115561 atgtatctat gagcgaacgt caaagttata ttgcaaatga cgagaggtcg attcaaattc
   115621 aacagaagca agacctgtcc atctattgga atgttatctc cgacatagcg gatagggcgt
   115681 tgggtgctgt cgcatgcaaa actaaagagt tacctgattt gtgtgagagt agtgttatag
   115741 ttatcgacga ggcgggtgta atattacgac atattctgca cactgttgtt tttttttatt
   115801 ggttttataa cgcgttgtat aaaacccctt tgtatgagga cggaattgtt ccgtgtatcg
   115861 tgtgtgtggg ttcgcccacg cagagtaatg ctttggtgac ttcatttaat ccgctgactc
   115921 aaaataagga cgtgaagaga ggaatagacg tactttcggc cttgatttgc gacgacgtgc
   115981 tgtctaaata ttgcgaagtc gataacaact ggataatctt tgtaaacaac aaaaggtgtg
   116041 cggatcatgc gttcggagat tttttaaagc acatagaatt tggtttgccg ttgaagccgg
   116101 agcttataga gtatgtcgat cagtttgtga agcccgcttc gtacatcaga aatcccatga
   116161 acgaaataga aacgacccgc ttgtttttat cgcataacga ggtaaagaac tatttccgtt
   116221 cactgcatga gcaggttgaa gttaccaaca gaaataactt gtttgtgttt ccggtttatt
   116281 ttctgataaa aaacaagact ttcgaggact acaaaagtga aattggcaat ttctccttag
   116341 aaattgaacc gtggtttaaa tctaatattc atcggctgaa tacttattct cagttcgcgg
   116401 atcaggattt atcgaaaacg gttcaattgg aggagattgt tttggaagat gggtcggtgg
   116461 aagagacttt gataacctgt catctgaaac atatcagaaa cagttcaata ggtgtaacgt
   116521 ccaagatcaa ggcttcgacc gtgggttttt ccggaactta tgaaaaattt gtagaactgt
   116581 tacagagcga tttatttatc gaaaaaacgt catgtgatca gactatccac gcatattctt
   116641 ttttatccgg tcttatgttc ggagggatgt attctttttg ctgttcgaaa ttcaccaccc
   116701 ctgaagtgtt aatggaaatc aaaaacataa agatgcccag tattgaattc ttagaaagtg
   116761 aaatgtcgag gatgtctccg gacgtacaaa ccgtagagac agatgaaagg tatgatttcg
   116821 gattagtcga tgatgggtta tcggatgtgg atctattaga gatcgatcct tgcggagatc
   116881 cattttttac taggtatagt aagttgcctt taactaattc tctgtcgttc gaggaaatca
   116941 gtttgcttta tacgacgttt aaggatatct ttatatctag gtttgctatt ctgcagaagc
   117001 atacaaaagg gaagttcgga aagactctcc tagttactta taacagaaat aatgtttcta
   117061 gaaaacagtg cggtgagatc tattcccatt taaagagttt ttatggtatg ctcacttacg
   117121 ctatccctgc caataattat accctggagg gctatacgaa tgataacgta gttcatttag
   117181 gaacggataa acaattaccg cagatcttat ataaaaaagg attacctaga ttagttataa
   117241 aagatgaaat ggggttcatt tctgttttag ataataacgt gtcgaaattt atcgacgtcg
   117301 taaatggtca gagttttcat ctatgtacaa cggtggatta cgccactgtt tctaaagttt
   117361 ctatgaccat cacgaaaagt caagggcttt ccatacaaaa ggtcgcaata gatttcggga
   117421 gtgatccgaa aaatttaaaa ttgagttcta tttatgttgg gatgtcacga gtaaccgacc
   117481 cgaataattt aataatgaat gttaatcctt tgagactgaa ttatgagaat gataacttta
   117541 ttgctccgca tattgtaaaa gcgttaaaga acgaaaatac catgttaata ttttagggag
   117601 gttttctatg agtatataaa aaactaaaac atcagatgaa ttgtgcgtgt aattgttaaa
   117661 atcccatacg gtcgaatgag ctcattcccg tcggtccgtt tttctctgca aaacaaaggt
   117721 accacgggga tttagtacag tatgtctcca aacagagaag ggtatgaaac tttatgagga
   117781 actggtgaga aataacttac ggttatgatc tcggtttcgt cgcaaaattg aatacagcta
   117841 caggggtgtg gtctgagatg acatctgcaa aaaaacaaat gaaagtctcc cccggagtac
   117901 acgtatgtac tccgggggga aacctcaaaa atgcacaatt tagcctatta agcagccgcg
   117961 aactcgttaa tagttacttt gatgttaact caggtggtgg cttggatggt gtcctaagta
   118021 tcaatcgaag ctcctttatt ttttgcacta ctgaagttat tttaggtatc ggggtaagaa
   118081 taagatgacg aaaaaaatat gctagatccg tccattaaat cctagagttg tttttagtaa
   118141 taggttattt acaaaagcct gcatatgatc caatgtttct gtatgaatcc agataaacaa
   118201 aaatccagga gtaatgattg gaatcacaaa atgattagat gcttaactta cttaataact
   118261 atacttaact atacttatag actaaactta acttatcaac tatacttaat ttttaggtcc
   118321 ttataatgtg aactaaataa tcaactgttt tgtgcccaac cccccactac taaagcaatc
   118381 gtctttgatt tatgaaacaa cgaggcccac ttcacgttat tacatagatc aaggtctatc
   118441 tcttggcggt ttttgaattc tttcgagagc gtaacggttt ctaggtttca gacacgttta
   118501 tccattcgcc gggtatcgat cggatcatat cattagccgt gaataatctc tgactttaga
   118561 tataacgtgt gaaaactagt aaaaaaggac aagagcagcc gcctttgccg tcttcatgag
   118621 cgttaaacac tcatgaggtt cgtatcttac aacacaatat gtgaaatatt gtgagcgagg
   118681 ttaccggtgt ccaagtcgta atccgaaaat catatattga aacttgtaac aatgttatgc
   118741 agttgtactc aaagtatatg gtgatgaatt gaacatgttt ttgatgtttt cgatggtatt
   118801 cgaaaataat tttagatatc ctgtagtttt tttctgatga cttttctgat gacttttctg
   118861 atgacaatat agaagatggc aaaacaacaa gttactggta gttcttgatg ttaaataaaa
   118921 tgaatcggag atatgacaag tagagagagg taggtgatac gagtaaaatc gaagggtgtt
   118981 tccacacaga cgggggggaa attctatgag aaccacagcc agaagcaatt gacgacaata
   119041 gagaaaataa gcaagcatat tcatctgtta tagaaagaac cagtgaccta cgactttcca
   119101 ttcaggctag catggtgtga acgagggttt tttccgaaaa aactagatga ctatttcttt
   119161 aagcaagtgt aatttttagc agtccaagtt tttatgcaac gcagatttta atgatgtgtc
   119221 cctcgataac tatacgctgg aaactaactt acatcttagt tgataaacga ttttctatta
   119281 aaaagactaa agggattttt tgatatatac aaaattgtat tgagctcttg gaagtgcgta
   119341 gatgcaaaat aggttaaatc ttaccttgaa gttacaacag gtcaacgtta gagtagacgt
   119401 aaattccatg tgtcgaatgc gctgtaaact ttttcacgga aaattaaaaa caccgaattt
   119461 gttcacgatt atataagcat gaatttgcaa ttttaatagt cctataaagt tttcatttcg
   119521 atctaactac attttagtat ttatgttcca taatgtatca aagtgtatac gttcaatctg
   119581 tataagagtc tgcatcaagc ttcacgtgat ttgtagttcg cggtttagta ttcgctgttt
   119641 tgccgtgtat gagacttaca tagtttgatc cctaatactt ctgacaggcg acgagccttt
   119701 ttatatgcat tttacgacaa agtccacgcc cttgtcgctg acgcaatacg taaaggtttt
   119761 cggtttggat gagaatgtgg ttaaccgtta ataaaaaagt cgatacggaa aaaaagtcga
   119821 acggtatttt tagatatcgg gtcacatatc gatttaatag atttttatat cgtgttcgtt
   119881 gtccgactta gatatgtcgt ttcatgggaa aaataaatcg ttttagttgc gtgctgtggt
   119941 ttttggatcg caaacgcttg agcccggaag tgtgattcgt gcgcataaaa ggacgttggt
   120001 aactgtgttc gctagctcat ttgtgttaga tgagcggcaa atgactcatc tttctgggat
   120061 ttatatggga atattctggt aaaaatgcat gtatcaattt tagtcgtttt tggatttctg
   120121 taatgttacg atttgctatg tgtatttcca tagtgtcgag cgtgtctttt ttttcttatt
   120181 ttttacacag ataagatgta tgctgaagaa cgtggatatg ggtcatttga caatgttatt
   120241 gaagattatc aacaaattgt taccgagttt attcagctga aaaggtttca tttcgacagt
   120301 ggccgtttaa ttgagttctt aggtgactct ggaacatgtg aaacattttg taatggatgg
   120361 atatcaatga tttgttggac atccgataca aattcaatgg gttctctaac ggtggatatt
   120421 gggatggatg atggaaaata tagaacgtac agtgctcggg gttttttact gtgttcgaaa
   120481 tcgatcacgt cgatttctca gaatactgag ggtagagata ggattttgac tgtttcccaa
   120541 gacaacgaca aacttcaaat aacgtttgtt actttaacta aagttttcaa agagcagaat
   120601 atacaaaatc tgggcgatgt gaaatatatg gaaaagtttg aaaaagaatg tcgagcttta
   120661 gacagaaaaa aacacgacga tgaacacaga aagcgctcgg ggaagcaaaa agaaaaaaga
   120721 aaagtggagg acacggacaa aaaaaaagat gatgacagac gaaaacaaga agaaagaaaa
   120781 cgaaacgacg aagacaagca accggacaaa aaggaggaat cggatggtaa atatgaatgt
   120841 atagttgttg taaattttta tttttcgtgt gtcacggtcg tggacttttt tttaaatagt
   120901 atctgttttg ttgcaatttc agaacttcct aaggagaaga gacagaagta ccatgacatg
   120961 aaacgtaatt tggaagaaca aagtcacgag gatggcataa taccaacttc tacgacactc
   121021 gtaaatggag cggttgaggg tgcgttaccg ccctgtattt ctattgataa tcacgaagat
   121081 caacaacatg atgaattaga caagcgcgct tatgcgcagg tgggtggagt ttcgggttca
   121141 ccaaaaccta agtctctggg gtctttgttg tgcgtatcta aagctgatct ttttatttta
   121201 ggggacgaac cgagaaggtc tatccaatga agataattat gggaattttc agcttaataa
   121261 gtctttagaa cagcttaggg ccagacttgt tgcaagcagc ggcgacattg tagaaagatc
   121321 gcttttgaaa ttgaaagagt gtttggataa tgtaaaggat aatttaataa aaaatgaatg
   121381 tgctgatgtt gctgttccaa gtaaatgttt aagtaaaaca aaacatatcg agccaaagaa
   121441 acagatagtg ttttctgatt gtatcaggcc ggtacctgtg tgtgagatta aaccgtttat
   121501 cgatgtggga gtatttgaaa cgacgccgaa cgcaagaaga cttcgacaac ggaccagaac
   121561 aaccgaccgt atttcgggac aaaaccgggg cagagcacga ggacgtggcc gagggagagc
   121621 tcccaggaga cgaaattcca atataaataa ttcaaggaca caaactacaa ttgttataga
   121681 cgatagcagc gaagccgaaa actttgaaaa tgaggggagt tttaatgaag atttactggc
   121741 aaccacaata ttggaaacac tgtaaatttt attgttgtat tgtaattatt aggtaaactg
   121801 aataggtttt attcgttcag aatgttccaa ttgattgggt ctttcccgtg ctccgtaaga
   121861 aataaatttg ctcgcacgaa atgattgcaa ccaataaatg gcatccttgc agacttcact
   121921 ttgggcgatg gatgtgcact ttctaagacg agatgtttcc gtgcgtctat tagataagag
   121981 agtttccggg catggtttcc ccacaataag aaaacgagag agtccatttc taccgatagt
   122041 ttgctgataa tcttatagct cagtgtttgc cagccaaatg cctcgtgaga cattggtaat
   122101 ccatgaacta cagtgaatat cgagtttagc aataggactc cttcactaca ccaggagttt
   122161 aaacagccgt tgtcaggggg ggaaaaattc ggcacgcttc tttccagttc tttaaatata
   122221 ttctttagag attctggaat cgagcactct ttcactgtac cgaaggccaa gccgcaacct
   122281 ctgccgtcgg gatacggatc ttgtcccaaa atcacaactt ttacatcgtc gggtttgcat
   122341 aaaaaactcc aagcgtggac gttacccgga gaggggtgga ccgttagatg agccctatcg
   122401 ttgtccacca atttatatac atgtttaagg tgtgtaattt ctaacttgga gagttgcagg
   122461 aaactcaacc agtctctgtt tatgccgaag agtgaatgct gatcatctat tgaaaggttt
   122521 tcacagtttt tttcttcatc ctgaacgtga tctaacatcc actgtagtag ggccatggtc
   122581 ggggaatgaa atgcagtgga ttaaattccc taggaggatt ttatgtgaat gggacgtgat
   122641 gtcatagcca attatgtgtt tctaatcaga attgtagggc gggaacttcg gaaaggtagt
   122701 ttagaattgt aggtttccat atgttttagc aggtcgagct ctactccggt tttcaagtgg
   122761 aaatacttta aacaattcaa aatcgtatca aaaagagtca aagagttaaa agggaaccta
   122821 ataatttttg tgacgcctct agcaggattc tccaagtata ataaaaaacc aatgttgctg
   122881 taaaaactgt ctgtgttttc tgaaatgtta aactcgagac ccgcaatgtt atcaacaaaa
   122941 aagttattga cgtacgtaat tttttcgggc gaatattttc tacagttatc tctgatgcag
   123001 gttgttattc cgacggaagg tgaacatgtc tggaagccat tgaaaaagtt tagccagatg
   123061 tcccgagatt ctgggtccct tattagcgca aacaatgtgc gtagttgttc tgggttatcc
   123121 tgtaggagta agaagtcgct gagaaattca tcggttacca ttatacggct aaaaggcttt
   123181 ttttttgtcg ggggttgtag cagtattgac ataacgtctt cattatatgc cggaggctgg
   123241 tagattggtt ctagtaatag aggcacttcg gatttcgtgc agtttattac agctgcgata
   123301 cagtcgtcaa gtttttcaaa atagaaagaa ttatggttga aaagaggtat tgcttttgag
   123361 aaggttagta atatgagtga cattacaaat agtaaaagtt ccatggttat ttttttattt
   123421 ggaaaagtta acacgacggg aacaacatct tatatatagt agggaaaaag acttgtcgaa
   123481 atatccattc ggctttttat ttgttttttt atacggcata tattggtatg gctatcggat
   123541 ttatatgtag ttcccccgat gcggagctgt tttccgaaaa atcacgtatg tcgtcttctg
   123601 tcttgttagg atgtttgttg tgttgcatgg attggtccgc tgccgtacct gggaaaacag
   123661 agccttttag aaaacttttt gatgcaatca tgattaaaaa gctaaaaagt tgttctgctg
   123721 cttacccgtc tgatttggag cagggctcga tgtgtgatat ggcagatgca tcgccgacaa
   123781 gtcttgaatt aggattgtcg aaattagaca aataatcatg aaagtattcg aagacattaa
   123841 tactggtttt ctttttcgtt acgacgaaca atatagaaga cgcaaagaga gaccaattta
   123901 gattcgagcc aaaaaagttt atttagtcag tttaatagtt tgccataatc atcccaataa
   123961 atatatttgt tgaaagagtt gtatatggtg atgtgttctt gaaggagcat cggttgtgtt
   124021 agctttgcga tattcaaagt aatatcgttg ggatagcaga tcgcaaaatt gatacaaacg
   124081 tgagcggcgc ataataaatc cttttccgtt ggcgcgttta tcatgagaga gcaaatgccg
   124141 acaagctttt tttttgaggc gtttaccggt ataggagtta cagcgttttt tcggagtgcg
   124201 tccgtttgtg ggacggtccc tctgaaaaac tgattgattg caatagcgac taccggttca
   124261 tggtgaaccg attcagaaat tatctgctcg cccacgttaa taaccatgtt gccgatggac
   124321 atcaattttt cttgcatggc gtttattaag atcttatttc gggaataaac ctgtatttgc
   124381 acaattgaag cgttgtagca gcggaataat ctgtaaattt ctgacataaa atttttaggt
   124441 gagcacgggg agtaaggtgg agatgtttcg taagattgaa aaattttgaa agcgttgact
   124501 gtattccgat cttgcctttg gcattccgta gacctgacaa tttccttttt ctccgttgtc
   124561 gatgtattta caggcatttt gaatgacagg tcggcgagag gtttgtccgt aaatacagta
   124621 agacgattaa tttctttttc ttggcgaaac acggcgtttg agattttccg tagtttggaa
   124681 taggcgtaga tcgcgttatt tcgatatttt tccttattaa attttatatc ggatggggtg
   124741 tgctggggga agactcttgc agttgcataa tcgacgggtt tttcggttgg ggtggtttgc
   124801 ggagatagat tgttttgtaa tcgattattt cgtatagtcg ttttagcgga tagatttttt
   124861 ttccgttcta tgaactgttt cgttgttttt ctagttcggc gagatttgac ggtctgtctt
   124921 gttttagagg tgtttttatt tcctctgtct ttcatctctt ctgaacttaa gctatataaa
   124981 ttttaacttt taaatgcaac gatacacacc gaaatcagta gcactataac tgatatcaat
   125041 atcagaatta atggtacggt ccaggtaaat acggtttcgt cagaatttga accttttacc
   125101 gcttctttac tgtattcgtc gtgattctgc acagtgtgtt cgccggaagt tacaagagcg
   125161 ctagcctttt ggttggtaaa ccaactcgac gctagacatg agacggtttt cccgacaaat
   125221 tccagcttcg ttcgtctttt gaaagtaaag ttcacactaa cggttgacga tccgttctca
   125281 ttctgtctaa ctattggtat gtctctctta tatacttctc caagaaattt aataagcaca
   125341 tttggttttg gataagacgt cacggtacac gtaacgttta aaaaattgtc taagtaacga
   125401 aagtacaaaa cgacgatggg tttcataatg agttttaagc aactagtcgc agacgttttc
   125461 tcgttatcta ctgtgaatgt acaggttaaa catgtcgcgt catatgctga tttggcttta
   125521 attttcaaca gagatgtagt tctattgtgt tttatgtgga aatataattt actgtccacg
   125581 gcgagattgt tgatcttatt tagttcgtgt ataaggacgt agccatcgtc agtgaacgat
   125641 aagttgtcca tgttttgtac ctcatgattc gatataagtc ggcttttatt gtaccacgag
   125701 acgcttcgga tgtttgtggt tgtgttgagg cgacaatgga aagtgacaat tgaccctatt
   125761 tcgtatatta aagaaggact cgtctccggg tggagtacaa aatgtgcact tatgatatat
   125821 agaaacggca ataaccgaag catcagagaa ctcatagtgt acacctgtgt caaatagcag
   125881 tttctgtgcg atagcggttt ctgatatata taagtcacgc ttaaaataaa aaaacttaag
   125941 gatttccgtt atactgtttt attttttttt taaaaagttg ggagttaaca ttttgaaagt
   126001 gtactaaatt tcgatttaaa atctttgctg ataggattat agatggagat aggattgtca
   126061 ccgtcgatga ttgaacacac ccgaaggaca atttctttag ggttatcttt ggcatactta
   126121 ttgcatgttt taacagctcc tacaaagtcg atgggcgtag cggcgtaaat tatcatagtc
   126181 tttacgtccg aatgtctcgt aaatagatca tgtgttgtgt tgttttcaaa tttatcccat
   126241 aattcttgcg gtccttgttt ttgtagttgg ataaatcgtt taatttcatc tttgtcataa
   126301 tacttaggcg gtgcatgatt cattttaaat gcctctgaaa cagtgatgtt gggtcgaatc
   126361 attaattctt tttgcattat ctttatgttt tgagctactt tttttgatct tgtaaagtac
   126421 ataatgatgg ctgcgttgtt agagagccca ttacagcaga tgttgtatac agcttctttt
   126481 agatttttgt cattgcaagg ttttttgggg atctgtttgt attcaaatgc tctcatagta
   126541 tttctaaata gtttttgaaa atcttttgta gccaccctcc cgcggtgaat tttaaatttt
   126601 tctgatactt ttctttcttt tagtctaaca taatctctat aacacaaatc gtcaatttca
   126661 cttacttcag actctgtttt ctgcgctccg gatattcttt tcttgcagaa attttttatg
   126721 ctggaatctg aatcatcatc gcgggggcgt ttttttttgc atttttttgt gttgtgtaat
   126781 ttgacatttt gtttttgatg taggtgagaa gtcgtgatat taggtgcctt tttttgttct
   126841 tcatcaatgg cgttttcgga atgattggat tgttcatgtg tgttaaatgg actagaattg
   126901 tgtaggggaa atttttcacc tgcttccggg gagtttctaa acacatctgc atgtctattc
   126961 gattcgtaat ctgaagacat gtttgtagtt ttgtgttttg aatctgattt agattttatt
   127021 tgtttattgt ctctattttg agttttgcgg catgttttta atgtggattt ggaacatgat
   127081 aaagaagctg atgatgatga tgatgatgat gatgatgatc tagttctgga agactgatag
   127141 taaaatggtg taaacttctc ttttccggtt actatatgtg aattagatct gcaattttct
   127201 tcaatactgg aagagatgct tgatgatcca gatttgtgtt tttttcttct tacaatggtc
   127261 agtgaatctg gtgaatttcg acagtgagat ttgcatctag acatagaact ttctgaatcg
   127321 gtgtcattgg tggattctga tttttttctg ttggttctta tatgaggtct gaatcggggg
   127381 ttgtaaaatt gatcattgtg attaaagcac tggagtcgag ctgcagtatt tttgtagaaa
   127441 tttagatctt ctccacatcg aaattttatt tctgatattt caaattttgt attaattgag
   127501 gtgtcatgtg gaggcgtttg tcttttatta gaatcgcaat aaatctgcct cagctccctg
   127561 ctggaagccc tgctggaagc cctgctggag gcttttcttg aggctttact tgaggccctg
   127621 ctagaatccc tactggaggc tctgctggag gctctgctag aatccctgcc ggaggctctg
   127681 cttgaggccc tactagaggc tctgcttgaa ttcctgctgg aggctctgct ggaggctttg
   127741 cttgaggctt taccggaggc tttgcttgag gccctgctgg aagccctgct ggaggctctg
   127801 ctggaggctt ttcttgaggc tttacttgag gctctgctag aatccctgct ggaggctttg
   127861 cttgaggccc tgttagaatc cctgctagaa tccctgctgg aggctctgct agaatccctg
   127921 ctggaggctc tgctggaggc tctgcttgag gccctgctag aatccctgct ggaggctctg
   127981 ctggaggctc tgctggaggc tttgctggag gctttgcttg aggccctgct ggaggctcta
   128041 cttgaggccc tgctagaatc cctgctggag gctctgctgg aggctctgct agaatccctg
   128101 ctggaggctc tgctgggggc tctgcttgat gccctgctag aagccctgct ggaggttctg
   128161 cttgaggctc tgctgggagc ccttttagaa gccatggtgc aacttttact cagatgttta
   128221 tcagagtttt tgccacaagt tcggttagga tctttagatt catttttggt ggaattgcag
   128281 ttaggtttct tgtcagtaca ctcatcactg ttagaagtgc tattcgtgat gcttttgtta
   128341 ttgttggatt tgttaaaagc agtaggattt aaattactcc gaataggtga attgtctgtt
   128401 aaatttttgt cggcgcttgc agtgtggttt ttagcactgt ttttgtccat aattgaagga
   128461 ttttttaact tgcaatatgg agaaggtgat ggggtaatag tttttaccgg agatttgtat
   128521 tgaccttctt catcagagct actggaataa tggtgtgttt ttgattttgg tgatgtagat
   128581 gtggctttcc ctgaaacatt cttaacggat acgtccttaa agttttggtg tccgttggag
   128641 tttgtagtat tttttttaga tgttgtacgt ccaggagaat gtttcatttt aggataattg
   128701 tctttggagt catgatgttt tttgtaagaa ttatctttgg tcggggctct tggagtatgt
   128761 tttgatatgg gaactgtgtc ttgtagagaa gtttttgatc ggtgtagatt ttgttttatt
   128821 tggttgaatt ctggtgtcga atagaattta tccgtatggt ccgcaaagtc tatggcgggt
   128881 tcaggtgtca acggaagagg agataatagg ggatctaatt ttgaaaaatc tctagcttta
   128941 gtaacggctt tatcttcatg ctcattagat tttctctctt taagatcaga acgtgatgag
   129001 gcatggtttt catcatgttt gtttgtttga gaactgcgtt cttttttctt ctggactgat
   129061 ctacaacgga tatgtgcttt tttgtacttc tgaatatcca cgtcacgatt tgagccattg
   129121 gctgttaagg cttccttcgg taacggaata acgtcagtgt catatatttt tttaataata
   129181 tccagtttta tgggactagg tctgtatgat aaactgatcg cgtcattaga cgttaaaact
   129241 tgatttcctc tggatgtttc gttatcctta gtagccttat gttttttagt ttttgtagtt
   129301 tctggtattg tctgtgcttt tgttggatga ttgtaattgt cagattgtac gtgtgtggag
   129361 tctgttgaga atgccatgct atagtcattg gctccaaaat tgaacttgtt tgttagttgt
   129421 gtaaaatctt tatagttatt catacggggg tctggattct gttgttcgta gtttggatac
   129481 gtgtaatgtt catatggtaa atccgcggat ctgtctgagc aatcgtatga tctgtggcct
   129541 cttccgcgtc tgttataagt tctggtaaaa catcttttgt atggctgttg atactttgag
   129601 tttggattgt agtaattata ttttccattt cctcctctgg gcctatatga atgatgtcta
   129661 aagttatagt catatcctct attggtattt ctagattctc tgtaggaact ctctatatct
   129721 ctgtatggat catgataagg ttgatatggc aacgaggtga aattgttctg tagatttgca
   129781 ttttggttat gtgacgtgta catgggctgt aggagttgat tcggtagttc cgaagcaaag
   129841 cgcacctggg tcgaaccgct ttcgtttgat ggtagattgg aagcagagga tgtgcattgt
   129901 ctgtgggtct gagctgctat ccgtggatcc tggatagttt ttgaaaatat tctggtttct
   129961 tgagaatata taggatcttg atgcgtatta tcactcaacg gttgtgtgtg tgtgatgtcc
   130021 gcatcacagt atagtccgga taatttcatg gcgctttgaa tgacgtcgtt atcatttcct
   130081 tgtttgcatt tgtgttctgg aaaacatgtt tataaaattg aagcttaata gacagtattt
   130141 gcttaatgta tttaataaat tacggataat cattttcatt atgatacagc ccgtgcagag
   130201 gatgatgttc ataccgattg tgcgtggtgt gcaaatgaag acgttatagt ctgtagtaaa
   130261 aattcactaa atcgaattac taacaatggg ggggattatt tatataacaa tagtatatta
   130321 ggtgtcatat attaatttca tttaaaacta ggatggacaa tgacataagt tatatatgaa
   130381 acccggtgaa gttaatgaca attgaattgg atggtctatt aatttatttt taaatatttg
   130441 cattagatta tattataata aaattgtttt aatgttaaaa atttaaatga ttgatgtatt
   130501 cattattgac atgcagtaaa tccagtatat tggataaaag tgggatttat tagtcggggg
   130561 ggtatgtata atattcatgt ttttaagata tggtatttat caataatcta cttgtctaat
   130621 tgtgttggtt gtgtgcaaga aacctgtgga tatattaagg aataattgaa attgaattgg
   130681 gtgaagtttg tgactatcaa agggttaata tgcataatca aataaatact gatgctaaca
   130741 tggggatgga tataatttaa taattagaat acaattatta aattatgtat tatgaatata
   130801 acataattta aagtttatag tagactagtt tcattatgtt tctaatgtga tagcgccctc
   130861 tgctgttgag gtacattata tgatattgag cattttaagt atagtagttt gaatatgttt
   130921 ctgatgtgat agcaccctcc gttgttcagg tgaaaaatta atagtggtaa atagacattt
   130981 ttaaagtact ttaaacctag taatttcatc tattgtgctt tttgtgtatg tctttgtgta
   131041 tgtctctgtg tctgtgcatg tgtctgtgta tgtgctgtgt ctgtgtatgt gcatgtgtct
   131101 gtgtatgtgc atgtgtctgt gtatgtgcat gtgtctgtgt atgtgtatgt gtatgtctct
   131161 gtgtatgtgt atgtgtctgt gtatgtgtat gtctctgtgt atgtgtatgt ctctgtgtat
   131221 gtgtatgtct ctgtgttatg tgcatgtgtc tgtgtatgtg catgtgtctg tgtatgtgca
   131281 tgtgtctgtg tatgtgcatg tgtctgtgta tgtgcatgtg tctgtgtatg tgtatgtgta
   131341 tgtctctgtg tatgtgtatg tgtctgtgta tgtgtatgtc tctgtgtatg tgtatgtctc
   131401 tgtgtatgtg tatgtctctg tgtatgtgta tgtctctgtg tatgtgtatg tgcatgtgta
   131461 tgtgtatgtg tcatgtgtat gtgtatgtgt atgtgtatgt gtatgtgtat gtctctgtgt
   131521 atgtgtatgt ctctgtgtat gtctctgtgt atgtctctgt gtctgtgtat gtgtatgtgt
   131581 atgtctctgt gtatgtgtct gtgtatgtct atgtgtatgt gtatgtgtat gtgtatgtct
   131641 ctgtgtatgt ctctgtgtat gtgtatgtgt atgtgtatgt gtatgtgtat gtgtatgtgt
   131701 atgtgtatgt ctctgtgtat gtctctgtgt atgtgtatgt gcatgtgtat gtgtatgtgc
   131761 atgtgtatgt gtatgtgtat gtgcatgtgt atgtgtatgt gtatgtgtat gtgtatgtgt
   131821 atgtgtatgt gtatgtgtat gtgtatgtgt atgtgtatgt gtatgtgtat gtgtatgtgt
   131881 atgtgtatgt gtatgtgtat gtgtatgtgt atgtgtatgt gtatgtgtat gtgtatgtgc
   131941 atgtgcatgt gtctgtgtat gtgtataata gagggaaaca aatagagaga tagaggatag
   132001 agagatagat atgagggggg ggggagatat aaatatggta attttcaatc tgtgtttcca
   132061 aaattgggaa tcatgtgtag catcttacct tcaaagtgat tccagttaat aagatgttgg
   132121 attaaaaaat ggatttggta ttttagatat atactttcaa gtgtttggtg tgacattcaa
   132181 agtctaatgg ttgaaaatgt ttttcataaa tggtagctat tatgtgaatg ttaagcaaaa
   132241 acagaatata cctgaaagaa taatattttg tagagtgtta tgatctagct atagctaatg
   132301 taatatattt tttaacagta ctatgattta tagaattaag atgtctcggg ggcattagtc
   132361 ttaatcaact ggtttagttt gggaaagtga aagtaaaaat ttgaatactt ggcatctgta
   132421 taaggttttt caagaataca attgtttata gtatcacatc tctaagaaag ctggaattaa
   132481 cttatggaaa tattatatga tgacttataa gtcagttgat gtacatgtct tggaattaaa
   132541 aagagaaagc aatgtctata ttacttttta ttatttgtaa tgtgatattg aaaataaatt
   132601 catttgagga atcacgtgtt tgttgatgta ttacataata caaaaagtta catttgctta
   132661 tgtaatttct aatctatagc aacaaaaaga gttacacaac atggggaaag tctatatttt
   132721 acaacagtat aagcatattt acataataca catctgtatg ctaatgattg ctaatcaatt
   132781 tacatctcgg ttttatctag ctaatagatt tgagcatttt ctacgaacgg atcataatca
   132841 gaagggtagc catctaattt aaaggcctct gtaccatcac tgttgcaatc acttatattg
   132901 gtacattttt cattagaatt acttgtacct tcagtgcatc tgttctcatc attttgactt
   132961 gttgtgtcat tgataatatt tagtatggag gaattatttc ctgttaccgg tgggtcaaac
   133021 acttgagttg cggttgttgc aacagtttgg gaatttgtca catttaaatc tttctcacat
   133081 gtagtagggg tgacaacatt atatttattg caaagatcct ggcaatgttt ggttatgccc
   133141 tgtttaatga tatcatttag atccataaaa ttatccatcg ccatatctat gataagtctc
   133201 gtatttggtg ttacgttttc cgagtctatt ttgctattct gtattttatt ataaatatat
   133261 gagacattgt ccttatcata gtcttcatca tccgttttga tggggacaaa gtgattcata
   133321 aagcagtgtt tggcttctgt cccatcactg tcatcttttg cattcacgtt ttcagaactg
   133381 tgaataggac aattgtctac ttggtgagtt ttcttcatat accaaatcca attttttctg
   133441 ggaataaatt tggatttgat accatgggca ccctgcattg accttattgg gatggtaaac
   133501 actggagttg gaaaaccttt acttggacaa tcaccattat tggtaacttt atcataatca
   133561 cttaaatgta actgtttatg ttcagatgta cagtcatctg actcgctgct cgattcagaa
   133621 tcagattctg atttaatagc ttttattaag attgagttac caataatatt gtcaccatcc
   133681 tcttcatctt cactctctga acttattaca attacgtctg cagccttagg taactgatct
   133741 gtcttaatct ttttttgttt gggtgattta cttgaaacat gtttcctttt agctaccctc
   133801 tttttaggtt tgcttcccgg agtcatagac ttaggtttga catttttctt agaaggggtg
   133861 acctctggtg gtgaacatat agaattgcta aatggtgtat tctcatcagt gctattcata
   133921 tgaatgttat tagtcctcgc agctgaatca gagtttgcaa tgtaatcaat ttcatcattg
   133981 ttatcgcttt cactctcata gggtgccgag tgatcagttt cataaccaaa catcaacatt
   134041 tctgatatta aagggttgcc attggaacca tcttgttctg tcccttcaac tactgaatca
   134101 cattgagtgt caagtagtct ttctagcaac atgtttttac aactctggag gccgctgatg
   134161 gaattcaagt tatcagggcc gcccagatct gtcactgagg ctgtacctac acagttaggg
   134221 tttgtttgtt cgtcccctga ctgtctgctg ttttcagtga atgttcctac atatttggat
   134281 ttccctggca cttctggaga aggagtgcat ggatacattt tattgtcatc atcttcatgg
   134341 atagattcga tagaagattc ctctgaatat cttccatggt catcaaaatc aattaagtct
   134401 aatatcattg agtctgatgg gtctgtgttt ccatcacaaa tggaagactg tctattttta
   134461 tccatattaa tgtagccttc cattatttga aggggagcta aaggtttaat taaaccagta
   134521 tcatcataac ttgattctaa gcgttcacat gcttgggtaa tcatagtcag catggtagct
   134581 ttaaatccct gtctcagaag tttgaggtgt tgccatgaaa attcattgct gcatataaca
   134641 atactctgta aaatagcatt ggcaagattt ttggcggcac taattaaatt tttacaattc
   134701 acattaagtt taaggaatgc tttatcacaa ccatccatga agatttgatt catctgcttt
   134761 atagcaaatg tctgtaaaat ttgcatattt ttagcatttg tttctactat ctcattttta
   134821 ccttccagta atgtctgttt aagtgtattt attttttcac aaaagtcctc actggagatg
   134881 tcaggattgg acatctcttt gttgtgtgcc atcatcatca acatggtggc gccctggtta
   134941 agtttctgac aatctaatgt cacagtagct ttagaaaaaa tgtctttgac ggccttaata
   135001 atgtcattgt tcatattagc tctcaaatcc aggagcaagt ttctggattc tgatgccacc
   135061 tttttcacta acccatcgaa tttatcacat gcaaaaacaa tgaatctagg ttcgcaccaa
   135121 ttaaaaaaat ccaactcttt tccatgcaac atttttgaat aagattcaac atatttagtt
   135181 gaagcactac ttaataaatt aatgtttatc agctgtgata attgttctaa tcctagtcct
   135241 atgaacatgg attgttgctg cgttaataag ccagcgcact taattaattt gtcttccatg
   135301 tcagactgtt cctgtttcat ggcagccttc actgatgcac caatactttg gatgcaattc
   135361 ccagcggact gagctaggat gtaaaagaag atattctgag tatgttatat gtcacatgct
   135421 taaaactatg ttttttcttg ttttctatct tgggacatat aatataattc atgtacttac
   135481 cagctaaagt tttcaagtct tcatttgatc cttcttctac attattggac tctatgttgt
   135541 tggaagactc tggtataata agaccaaagc tttcaaggcc tggaagaatc aggtcatcga
   135601 atgatgtatc acacatgaga ctgtcttcca atatctgttg gatagattct tccatcattg
   135661 gatcgggacg gtagctgtaa gtataaatat tttttaagta cttagaaaaa ttcccaaata
   135721 gtcttaaata aaatagatct aataaggact aatcatactt actcttgcat acgttcatca
   135781 ttggatccca tgttgtttcc agagggtttt gctggctcca ttgtatatta agatgcaaat
   135841 tgagacaccg cctactgtgc tgatagccaa tgaaaaaata tctcccgtca gcacatataa
   135901 tactaaataa ggacattacc accacctctt tctttgcaga gattctctgc ttgcacatct
   135961 gtaacactga ccataatggg gaaaatgtca tctactggaa gtggaaaaac taatctaaag
   136021 atactggcat gtatgctatt gatatttcta ataacaacaa tatctttgtt aatactggaa
   136081 attatatcgg gccaaagata ttccaatgat gattccgaag gtgtgactgc ggcgctgaag
   136141 catgtaagca cacctactac caactgcact gaaaccacta ctcctggtta gtgaaggatc
   136201 tgtctttttt attttaatgt attgattata tatttgcata catttcttaa gaatgaaaaa
   136261 aaaaatatca cggatggttt gtttttagat tccgtaacga gccaagccac gggaaacaaa
   136321 gaatcaatga aaaaaaatga aggggaacct ccagtttgga ttcaggcttt aactacaaca
   136381 ttatcaatta tcctattggt ttgcataata atggcatgca ttatatgttc ccggaccacg
   136441 gaagaagaga agagcggaat gcaatcttct gcttcttcag tagagacttt acagtcttta
   136501 aatgaggcta ttttaccgaa aggtgaaatg aatgtgtaat gtctgtattt ttctttgcag
   136561 agatgtatgg agagcttata ttgggggaaa atacctgact gttctgccta tattcgaatg
   136621 ttgaagtatg tacaatataa tttcttacct tttaagagta attcaaggtg gaggtttctt
   136681 tggagatgat tccaggtggt ggttttgggc gcaatcaatc ttctgggtgg gaagaaaatc
   136741 cagcaatgta ataattgatg ggatgcaatc gatgtgacaa atctgtaaga ttaaatgtga
   136801 acattataaa ttattttgtg attaacaaat tacaatcatg tgcatgtgaa aatatcatta
   136861 aattgtttta caatttttaa atgcaattta aaagaatttt tgtagcaatc ttaaatatta
   136921 atcgttacaa aattgactta ccagactgca acgatataag aaagaatgtc tgtgatgaga
   136981 atgttctccg gagccacttc ttgagaatag tggcactgaa ctggctgtaa cttctgctta
   137041 tatacaattc tgtagcgggt gtgatgtaca ggaaaatgac gaagatgaag gaaccaatcg
   137101 ctgtataacg ttaaaccgca agtgcagaaa tacacccctt ttagacaaat atggaattga
   137161 aattagttaa tgcttgcaaa aatttagggt tttgttatat tttacaaaaa caggaatttg
   137221 tggtctggat tttttgaggt tttctataat aaacaacatt ttactgataa attgtcatgt
   137281 tttttctaag aacatctgtt acacatcata agacatgtgg ttttggtgtt agcgtttctc
   137341 aataaataaa tgactcagtc aggggaaaat gttgcaatcg cggtcccctc taacctttaa
   137401 ttttatgaga aaaacaggaa ctgcggttgc cccgttagca aattttaggg ttcttgttag
   137461 cttgggcagg aaagacccca atcgcgatac ccactgacct ttaattttac gagaaaaaca
   137521 ggaactgcgg ttgccgcgtt agcagatttt agagttctcg tttgcctggg caggaaatat
   137581 tttccgagaa aaacaggaac tgcggttgcc gcgttagcag atgttagagt tctcgttcgc
   137641 ctgggcagga aacacctcaa ccgcggtacc cactgacctt taattttccg agaaaaacag
   137701 gaactgcggt tgccgcgtta gcagctttca gagttctcgt tcgcctgggc aggaaacacc
   137761 tcaaccgcgg tacccactga cttttaattt tccgagaaaa acagaaactg cggttgccgc
   137821 gttagcagct ttcagagttc tcgttcgcct gtgcaggaaa gaccccaaac cgcggtaccc
   137881 actgactttt aattttccga gaaaaacaga aactgcggtt gccgcgttag cagcttttag
   137941 agttctcgtt cgcctgtgca ggaaagaccc caaccgcggt acccactgat ctttatcttt
   138001 atgaagaaaa acaggaactg cggttgcccc gttagcagat tttagagttc tcattcgcct
   138061 gtgcaggaaa gaccccaacc gcggtaccca ttgatcttta tctttatgaa gaaaaacagg
   138121 aactgcggtt gccccgttag cagattttag agttctcatt cgcctgtgca ggaaagaccc
   138181 caaccgcggt acccactgac ctttaatttt ccgagaaaaa cagaaattgc ggttgccgcg
   138241 ttagcagctt ttagagttct cattcgcctg tgcaggaaag accccaaccg cggtacccac
   138301 tgacctttaa ttttccgaga aaaacagaaa ttgcggttgc cgcgttagca gcttttagag
   138361 ttctcgttcg cctgtgcagg aaagacccca accgcggtac ccactgatct ttatctttat
   138421 gaagaaaaac aggaactgcg gttgccccgt tagcaatttt taaggttcta acccgcttgg
   138481 gcaggaaaga ccctaaccac aacacccact gacctttaac tttatggaaa aacaaattat
   138541 tttgctcacc atgcagtttt ttatatatcg ttatatctct acccaatcag cacccttgat
   138601 gatgcataca ttaagggaat gttgattttt ttttcattgt acccacttac gaataacgaa
   138661 tcagaagcca gaaagtagaa tattttaatg atgtattaat catcatttcc taccacacct
   138721 attaacttca gtatttatag gagaggcatt tttccgttat gcgccattag ctgttcttct
   138781 gctaactcgg acgcagcggt acagggtgag ttatcagtgt cttataatgt gatgtctttt
   138841 tttttatttt cttgtcggta ttttaaaagt agtcttttaa gatgttgtta aatatatagt
   138901 tataaaattt tcggaaccgt gtagtcaata aaacaattta tagaacggtt cctggcccaa
   138961 aacagaaatt gatttatgtc gtctttctga attacaggaa aattgcgagg gatgacttta
   139021 tcaaatgtaa aattatatac cctctgtgat agatttattt tgtggagatt ggaatgtacc
   139081 atcgagcgta tatcaacgca agatgtggct atgatgggac acggtcctat ctgtacatgg
   139141 tcgttttcat taattgggaa tattattttt tgacctccaa ggagggattt tataatatta
   139201 aaattttcaa agttgatact tatgtctttc caccacaaga ctaaaacctg tccgtaagct
   139261 cttaaatttt ttgtattcaa agatccatgt aatattccat gtaacggtat attttcaaga
   139321 atggctcccg ttaacatcga ttttccacat ccgggtggac cgataaaact aacggtgttt
   139381 ttttttcctc ctctgtggct tagccactga tataatatgg ttcctgctaa tatagggtca
   139441 aaagactgca gacagaacag ctggtaaacc gggttttcat aaatctgaaa gtcagtgtct
   139501 atgtgcgcta taaaatcgat agctttccta gttgctctta ttcttttttt agctatagat
   139561 agagccctat ggattagcac gtccccgtgt gttagcgtca acaattgcat gtatgatcta
   139621 atgtctcttc gtatccacgc gtcttccgtg actattccaa gatcagacag ccattcgatg
   139681 gttcccagaa atttagattt taaagatatc ccgttaatcc catcctttgg aaacagcata
   139741 agtttgacat taggtttttt attaaaatgg gatatgatgt gttttcgatg tatttcatcg
   139801 catacgtctc ccagttcgtt aatatttgtc cacgcccatt ggaactgtgg tctaataatt
   139861 tgaagaaggg caaaggggat gtaacttaga ctgaagacct gggttccgcc accattcttc
   139921 tttgttttgg catacgtgca ccaatcatct attttagggg cgttcccgtc gaagaaatct
   139981 ttaattaata cgcccctgat ttccgttgtg tgttttccta tcgttgcgct gggaattcca
   140041 tctaaagcta tcaataatat tagggaaggt ctgccagctt tattctccgc ttgagcgtac
   140101 cactttgcag gggtggggac ggcagtttta ttattccagt aattgagtat gacatcgatc
   140161 attttggtac atgcagttat ccatttaata tcgggcgctc ccggtgagtg catatccctg
   140221 aaatgtggca cggacacgtt agagaattta cagaaaaaat ccgtagatat tccagggatt
   140281 tctgcctccc actccatggg gcctttgata gtcaacatga tatatttgtc cttagtccag
   140341 aaatcatcac tcggatttat tatggaaaac ataccgtttg cgcctcccaa gttttttata
   140401 gttgtatacg gaaaataagg taattcccct ggcttgtcac ctctagatgt ctgcgaatcc
   140461 ggacgatttc ttttggcaac aaattctcaa tatggatccg acggaacttt tgtcggacga
   140521 tgcaatctcg tccacgtgtg acaaaaacac tgcagctgga actgatatta tgcagccttt
   140581 gtgcgttgat atgtctgtcc aaccgacgac atcggggtgt tataccggag cgatgatgtc
   140641 agactcgtat ttctccaatg acacaccgga tcaaaactgc caatcacatt tgactttgac
   140701 ggacctttcg ccggaagaca tgaacaatca aatcaatgtt caacccaatc agatgacctt
   140761 tcaacccatt tccccaccga tacaggatca aaattatggc tatagcaata atatgattaa
   140821 tcccatcaaa cctgcatcaa ttatcaaatt acatggtcat tcgataggag aaatgacatc
   140881 tccaggccct tcctctcatg ttaatgctca acactttgtc caacagtcta atcctaaatt
   140941 ctttctaaat atgcatccgt gcatgaccgc taactcacaa ggacccgggg aatgtcagtc
   141001 tgtccataat caatcttctg gaagcgggtc taattcttat gacattatta cggcaccccg
   141061 cgatgaatgg atattgacta catccggcgg agaatcctgg attctgaaac ggaacacccc
   141121 taatcctcca aatagcagaa ctaatttaat tttcaacaac gcacaaccga ttttccatac
   141181 ccaacctcaa gtatctgggt ttagcgactg ttcctatcat gagggtggtc tcaattcaca
   141241 tgagtatgta aatttggcag gttacactcc cgtgtgcaac atgcagaata tgaaaaactc
   141301 atgggcgaca caactaggag catccattga ctgcatgact gcgtcaccaa ctggtataga
   141361 tgcgaatgtc aactctgctt tccagccggt gggggtggta tcaaataatc ggggtgctaa
   141421 tgttccaatg ggaggcatgg gtaattatat agagaataac agtccatgga accaatacta
   141481 taaatcggaa atggctaata attccataaa tgtcaacgag tcgaatggtt atggccatgt
   141541 ggggtgtgtt aatgacgcca tttccgataa acaaggtggc accgctaacg tcccatcttc
   141601 tctattgaat ccggatcacc aagattggat gaggatgact ggtacgagca cacatatgtt
   141661 aaacaatata aatgctaaaa caggaatgaa aaactatgat tttccggaaa atgatggcaa
   141721 tgtccacgga gccaccaatg taaatttatc atcaaccctg tccaatggtc agcagcatag
   141781 cgcatttgaa ggaaatggaa catttcccgt ggtaaatacc ggcaatccaa gaacgacgtt
   141841 gaactgtgct cctcagttgt tgtggcttgg aggaaacccg acaattgcac atccaatgaa
   141901 tgggaataat gaaaccccag ataaaaatgt atgcaagcct accctcagca caggtgtaat
   141961 aaaaaaaata aactttgact gtgttgaccg aggggaagga ataggaaatt ttcccaaact
   142021 ggcgtctttt gtagctataa gagaaaaaat gtcaaacacg gtcaatcctt cttgtggaac
   142081 ttttctagca cagttggagg gattacgcca gcagaattca tttgaaaaaa atatatccct
   142141 tactgatgta cagttttctg aagaagatga tgtgctttcc agtgcatcct cggtcagctg
   142201 taatagcaac tgcgacatga aaatcggagt ttcgcagcaa ggtaccactg tgtctaattt
   142261 acaacaaggg tttagacaac aaatcaacat gaactcatcc gtggttaaaa tggacgggag
   142321 ctataaaaca caagagatgt caaatgactg cgcgacagac atcacggata atgcaggcat
   142381 cattcaagaa aataaacgta tacactctca aaatgagaat ccagaggatg gccgggtacg
   142441 ggaggggggg tgttcagacg acaaaaatca acctccgcgg aaaagtgcgc gtattcataa
   142501 catgaagtcc gaaggcgtga cttgcggtat gtgcatgacg gctgcggatt ccacacggca
   142561 ggatgcgtct gggggttcga gtagcggaac caagaatgaa tattacgatg atgattcgga
   142621 attaaccgga ctgtcggata cagacagcga caacgaagtc caatgctgtg acaaagtaac
   142681 aaaggtcggt cccaagacgt actcctcaga aaattttaat cctgattatc gccaagccaa
   142741 gagattgctt gccgacattc catacagagg atggattcca gacccagtca atatggaaga
   142801 aaacgacggt ccgtttattc caatagtgac tagaccaccc actgtgtgta tgaacggtag
   142861 acgccggagg actttcttcc ggaaatgtgt taccgctttc ggtcctctga gtaagttaac
   142921 ttatttcaaa gaattactgc agagctacgt gtccaaaaat aacaatagtt atttaagtat
   142981 cagttggcct cccaaacacg gggtgtatgt cacgtcagag aagaaattag ggtatgaaca
   143041 tatacctacc ttgaaggaca agtttccact gccatgtggg tggatgatgg tccttggagt
   143101 tgtcggtgca gaaccgcccg cggctctgaa taaaaacatg gtgattctcc tgtgtgaaaa
   143161 tagatgggtg cttctgcata attactcaaa ctctacacac gagctgtttt tagccgcctc
   143221 ggatttgaaa cagtttatgg aggagggtct gtctagatgt gatcctatat atgaagaacc
   143281 aacagtgccg tacggtgtgg ccatggaaaa ctctcttcga gatttcttga gaaacagtag
   143341 aacgtttcag gatcttatgg atcaaaggga caacatgcac ggatgtaact ggacctttaa
   143401 cggaatgcct ggtagactag gtgacagagt catacatctc tgcaatcctg aatcggttga
   143461 ttccatacca ggagacgagg ccgtcgtatg tgaaggaaga cccttgtatt tctttgcata
   143521 tgttaccact ttcaaatcaa accccgctac taaggctacc gtgttaatag ccgcggataa
   143581 agatttaaga atatatggct atcataaagg tcgccccagg atacggtact tgtgtaagaa
   143641 cgtaaaaact ttctttaaag ccggggctag aaagttctat ttagattttc agattacacc
   143701 taaaagcttg cttgccgtca acgaagagga gtatctgaat actctacaaa acgctccttg
   143761 tctgctctta aaaccatctg tgtttagaaa gacttactct caggaaggta aataagaatt
   143821 cctatgtcaa tagttttact tcacagtccc caccctcttt ttttaattaa aacagaaagg
   143881 ccgttggatc caatctaccg agagatttac tgtttctttg acatttatca gggatacgta
   143941 tattgtgtac cttgtaattt ctatgtaaac ttctgctatt tttttttaat gttgagtaat
   144001 tgaacattgt aaataggtaa actgtttttt caaaatggtt agaaattcta tgtacttatt
   144061 ttttttctgt gtattgtaaa agggaagatt tgtaaggaca aagttcagta acatttaata
   144121 aagaacatgt gacacaattt ctgactctct cagtaatttg tgtaatttaa taagagccaa
   144181 taccaacgtg agggaaacgt aggttccggc caaggtgagg aaaacggagg ttcctgccaa
   144241 ggtgagggta acgtagcttc cgagggataa aaaagtaatt cgttactatg agtagtcgga
   144301 taaaacattt gtagtttttt gtctaacaca taataattat cttgataaca ttcatgtcgg
   144361 aataaatccg atataaacgt ttccatctgt agatatcttg gcccgttttc catctgtaga
   144421 tatcttggcc cgtttttgcg tgccaacata gcacttttgg ttaaattgtt tatcatatct
   144481 cttccgtagt cacttaaaaa aaaacaaaaa agacatgaaa tgttatagtc ggcctacctg
   144541 caatttatat aagtacaaat aaacacagta aaaataaaat gattcacata tggattaata
   144601 cctaatgact agattgaaat ccatccacgt tacggacaag ggtttttgaa cttggtcttg
   144661 catggtatat acaattgttc tattgtccgt gagaggtcga caaaacttct ggccttcatt
   144721 ttgaaacaga ctgaacaaat atcaagttat aaattaaccg gcgatgtcct gtgttattac
   144781 tcagattata catccacatg cacacacgat aaaatggtgt agtaatcatt caagtttacc
   144841 cgaggtgacg ttcccccgag taaaccgaac gatacttaca tttcaccgtc taggcaggtc
   144901 gaaatcaagg aagagataga agtcgatgag ttaagaacga catagctatc acagcacgaa
   144961 gtaatcttcg gtaacgtgct aaaaagcggt agcgcagcca ttccacgata tgcatggaaa
   145021 tgtattaaaa tatacacaac caagaaatgc ataattatct agcagcaata tagtttgtta
   145081 ttcaaacaac gattctttta tcttcattta aatataatat gaatatttac agctatatat
   145141 acaattaaat atacacatgg tcgataacgc actatttata tatattccaa aaaacaacaa
   145201 aaagttatcg ggggttatat ttatctacat cgatagagtg tacaaatgta tatgtaaaca
   145261 caacaggaaa atatacatgt cccaaggcgt atacattcta acacgcgcac ataacggtca
   145321 agtcctcacg acagtaggtt ttatatttat cattttgatg ttttcagatt ttacttcttt
   145381 cggattgtaa aatacgtgcc caccctgaca taaagcttgt ccgaggtgtt tatatacata
   145441 ttcttttctt tcgaacatat tttgtgtagt atatcttcct tggactgtga agatgttgtt
   145501 aaccatcaat agtcccgcat ttctaaaacg ttcttttgaa gtcccggtct gtacaaatat
   145561 ggtgctgcaa attaagaaaa actgcataaa tataaaatcc ggaaaagtca tttatttaat
   145621 tacgatcttt tgtaaacagc actcaccata atgcgggagc catgtgtgtc ggactggcta
   145681 tatcgtattt tatattagtc gttgtcaggt tttctggcaa agagtgccac aatgcgctta
   145741 cgatggcagg atctatgtcg ctgtgcataa ccggaaaatc ggaaaaaaaa ttaacataaa
   145801 agattactcc aaaaaatttg ttcctaccaa tcccctgtta tttaaactca ccgtatagtt
   145861 gttccttgct gtccgaccat tgacaatatt tgtgaggcaa gtcgcattgc gatggtttcc
   145921 atcagtttct cagtttcaaa tagtgcattt ctaaaccctc tgttagaaac ataagttaag
   145981 gaatctcaaa cgatacatcg cacacaatat aaattcaaac ttgcgttaaa aaaagagaaa
   146041 ataagcttac ttacagtacg gaagataaat aattcttcgt ctcgttttta tttaaacgtg
   146101 aacaccattc gaaaccttgc agtgtttcaa acctgacaaa aaacgaaatt cacaattaca
   146161 attttagaat tgtgttccac ctccatgtgg caaagctaat aaaaaacata aatgttccac
   146221 ctccatgtgg caaagctaat aaaaaacata aatgtagttt tttagtaaaa atcactaaaa
   146281 ttacttacac gacgtagcta tcgtttggac aatgagtatc gtttataggc acgtatacgt
   146341 caacgatatc ttgccacggt tcgaaatatt gagtctgagt ccatgagtta gaagattcta
   146401 acgtacgacg accatgctgc acgtctcggt gacgacaaca cgtgtcatta gcggcacgtt
   146461 tatacctcag tatgtcctct atattaacgg gcgcaaagcg cgtgcaggtt tcccaatctt
   146521 gcccgtcgtt gtcttttcga acgatcgcaa acgaggttaa cgtcttcata gtctgtccgc
   146581 cattgtttcg tattttcaaa atctcgatac tgacgatcag ctcacttgag tgaataaata
   146641 catgtgtgcc ccacggagag gcaagacacg gggaacgaga aaaaatttta tggttacgaa
   146701 ggcttccagc cccatagttt ctactctcaa aggatgtagg tatgcgtgcg gggttgatac
   146761 gtatgcgcgt acaggggtgt ggtctgtctt ccgggggggg gtggagtgga gagtgtaaaa
   146821 caagtagtgc aacgtttata gagtaacagg tgcatccaaa gacgcggcag ggtgtataga
   146881 tgggactctt tttagtaaac tcggggtgtt tatgtaactg ggatcttaca cttttttagg
   146941 tcgataaata caaaatgctt gtttttcctt gtcgataaag gagacgtgat aaaaaggcac
   147001 acaaacttgt acaggtactc accatagagt ctctttcact ttgtagtttt ggcgtagctc
   147061 taatttagta gtcattggac agaaagctat cgccgtcatc gcggtcagtg gtttcaggcg
   147121 cctcatatag gccaaactat tatagttgct cccgaaagcg ccataaagca gagacaggtg
   147181 aaggccgagg ctgctagaga gaatttgcga tagtccctta ggcattattc tatctttaaa
   147241 atttctcact cctttgttgt cggccgacag aggaacgcaa attatgatat ctccgaacat
   147301 gatgctgcga taaattagat atgattatta tctattcatt tatttatgat ctcagtagat
   147361 tccgacatcg gataaacaag atgaaacgct gcatccttac cgtgcttgtg tctctatggt
   147421 acaaccgcag ctattgtcat cgcaaacggc gtagttcagg atgtctgcta tatcttctaa
   147481 ggtagtagtc gggttatcat ctacggggac gaaagcttta actcttttta aacttaacat
   147541 ttcggaggta gaaaatttag agatgatttc ccatagcgtc cgtctcctcg gcgtagaatt
   147601 tctaccttcg taaatgttga aataaatgtt tttgtcatag tattttgcgg tatagttgcc
   147661 tttgtcctct ggcggcggtg tggatttcac ggttcccgca cgtcggtggg ccgtagcgtt
   147721 cgtcggggcc gtcgccatcg aaaacgcgca caaaaatatc agcgcacaag atctcggcgg
   147781 tctcataacg cccagtcttg cggttgccat tctccgtctc agtcctgtga aaatttcgta
   147841 tgcgcgggag aaacaggaca tggagtaaag gaagatgatg ttaaatagac tataaacaag
   147901 aagaaacgca aaacagatcc tatgacgacg ggagacaata ataaaacggt tcgcgtcggg
   147961 aaacattcgc gtgaatctaa aaccatgaga aattaatgca actagagagt tcacaaaaat
   148021 catatatggc tgccgacaac gtcgggcgcg ttcatagtca tttaccgtgt gcgactgaca
   148081 cacgtagtct tcaaactctg ccttctaaag tcacacctcg atggaaagat gctgcggcgt
   148141 accgttgtca aacagcgaac tcaaagatga gtcggggccg atcatgttca tctgcggcaa
   148201 tataaagcgg ggagaggagc ggtataaatc catagcgagg aaaaatacat ccaatcgcca
   148261 tttggcgatc agtattctgt cgctcatttt ttccgtaacc ggcgtgtgtg cagactgtcg
   148321 ttttggtggt cacatattaa gtctgcgtca ttttttcctc tctttctatc tcttcctctc
   148381 tattctttta tctgtctctg tctgtttatg accgcgcccg ttgcagcact tatcacacaa
   148441 cgcgcgccgg tgcgcgcttt tacccgtttc tccggcctct cttagtcacc tctaaagcac
   148501 tcaacggcac tccggccggg tcacttgttc tcataaaagc ggtctacttc cactccactg
   148561 agccggaccg tacccggacc ggaacagtta tcgccatata gctgccgttt ttctgcagcg
   148621 gcgagtcaga gtgcactcgg gccgagactc ctgttttgtt ttgttttcct atatcatcgt
   148681 cgccccgcgg cgcgaggtca gaccgcgcca gggccggcac acttttttgt ccaacaccgt
   148741 ttctccggga gacagaactc ctcgcgtttt aaaaattacg ttaaatcccc cgggggggct
   148801 aaaaaaaggg ggggtaataa ccctaaccct aaccctaggt ctagccctaa ccctaaccct
   148861 aaccctaggt ctagccctaa ccctaaccct aaccctaggt ctagccctaa ccctaaccct
   148921 aggtctagcc ctaaccaaaa cattaaccct aactaaaaca ttaaccctaa ctctaacacc
   148981 aaccataaca ctaaccataa aactatccct aacactacgc ctagccctag ccaaagtact
   149041 aaccctaacc gtagccaaag tactaaccct ggccataacc ctagccataa ccctagccat
   149101 aaccgcataa ctctgtccac aaccctaaca gtgatcctcg catccgcacc taacgctgcc
   149161 cctctttcac accatcaccc cctgccgctt caacttcacc ttcttcctcc atctcgcccc
   149221 gcttgtttct acacttgtcc acccctctat tcttactcta ggatgccgct aacggtgcca
   149281 tatcgtcttc cgctctccaa ctattggtgg ctactcttgg gtcgacattc ccttcgtcat
   149341 gttcattcct acgtgcgtct gcacaagggt ctacgcattc ctttaccttg gcccgagcag
   149401 gaatgcctac atttacatcc taagccttac aagtgtctcc tgcgttaccc ctgtataaca
   149461 acacaaccgc atcttcttca gggctggcct acgaagtctt ctctatgtga gtgtcatata
   149521 catttccact ttttcacatg atttattgcg ttttgtctac tacaccgggt acattttggt
   149581 ttccctcagg gttcgaccct aaaccctacc atccttcggc cgacagcaag ttgctaccgc
   149641 tgggcctgat cacgctgtcc gcctgttcca cgcgcgtgtc gcagccgaca cgccggagcg
   149701 gcttcgacgt gacagatctg tctctcagct ggctgacggg atcgtcccct tggctcgtga
   149761 tcctacaagg gcaggggggg tctctgttct gccacgacgt gctgcaaggc cgactctatg
   149821 tcctgtcgca ctccgtgtcg ctctttctaa agacgggcct ccgccactgc gaagccatct
   149881 atcgcgcacc gctgtggcgc gaccgacccc tgccgagcct gtggacgtgc cgggaccccg
   149941 acaaggcctt cttgccgaca ttactagcga gaagcgcccg acgcggcctg gccgctttct
   150001 acgccctgtg gagactgcat ctgggatccc gctcagagct ctcccacccc gtgttacagt
   150061 gggagagaac agagctggtc ctgacggact ggagacgcgg gcgaaaggag gcagagagag
   150121 tcggccccag cgtcgcggaa cacttcgcga ggtgcaaacc gctgctgaac gaactgtgcg
   150181 gagagggcgg ctggcttccc ttcgcgtttc tctccacatc tccgcacgtc tggctgatcc
   150241 taacggaagg aggccccgtc ctggcggttg acgtgaacga cacctccgtg tggcgcatcg
   150301 cggacgacct ggagctgctg cgtcgcctgg ggaacctgct cctcgtctca ggcctccggc
   150361 ttcctctccg tctcccgagc gggagcggcg aggcggccgg agagccgggg tacgaccaag
   150421 aagagagaag agggagagcg tcgacggcga gcgcgacggc cgcgacgtcg acgcgcggac
   150481 cgacccgtcc gacacgggtg acgcgtaagg ggcgtgtggc aaccggaggc gtccatctcc
   150541 ccgcacgccc cgaatctgag gaacagacac acggccacca cgggcgccag gagagcagcc
   150601 acgacgacca gcgcggcggg agcggacgag gacaccgcga tgacggcgcg caccgccacg
   150661 cgaatgacaa aacagagccc cagcagcgcg gagagcacga ggaagggaaa cagaccgact
   150721 ccgggcgcca cgagcacgca caggagagcc aggtcgcaag aagagacgag gagggaacgg
   150781 agcagggcgg tagcggaagg agctgcgggg gagcgacgca gacgtacggc ggcagaggcc
   150841 gacatgattc ctgcccgtcg atccccctgt ccgtccccgg gcccgatccc cgcctgtggg
   150901 tccctccccc tcatctgtta ttcccttccc ctctgccacc gatgacgccc gtcgacgacg
   150961 agccgtccgt ccgccctcgg tgcccgccga gtcccgcgga ggaacccccc acgtgtcgtc
   151021 cccgtccgcc ccgcccgtcg tccgacaccc cgctgtccgc tgtctcgcgc ccctccgctc
   151081 cgtccgtccc cccgccgtcc actgcgcgtg tccgtttctt cctctcttcc tcctcctcct
   151141 ccccgtccta ctgtccctcc ccgttgtctc cgccctctcc cgtctctccc tcgtctccca
   151201 gatctccgtt catccccccc atcagatctc cgggactccg agcgaaaccg cgagtgtcct
   151261 ccgggcatcc cgcgacgttc ccgccggcgc cctcgtccgc gccggcccgt ttcgaaagag
   151321 tcccgtccgc tccctcatcg gaatctccgt ccgcgccgtg cgtcggcaag tcacagccgc
   151381 ccgccgcaca cacggcgtga gacgccgcgc gaggcgacgg aggcgacgaa agaggacggg
   151441 aagaacaggc ggaagaacac gaagacgaag aggaagaaga cacgaggacg aaatgagggg
   151501 aacacgccgg agaccgagcg gcggatggag cccgctcggt ctcgcacgtc cgcgataccc
   151561 agcgggctcc gtcgccgctc cggacccgag gtcccacacg cccccacctc gcgcaccgcc
   151621 tccgccacca ccgctgacaa tctccgcata tcgcccccat acacacccaa cagcagagtc
   151681 cggcgcacgc acacgcgcgg agcacgcacg agaacacgcc agacatcgac cgccggaggt
   151741 aacggagccc gtgcgccgtc ccggtttcag cgggagtgtg tgcgggcgta ccgtcacacg
   151801 gaaaacccag cgggacgaaa cgatcgaccc actcccgcta tccgccctcc ccgagcacgg
   151861 tccacacgcc agtccgtaaa atcacccgag gggcggatcc gttccgcgcc cctcgcccga
   151921 tccgccccga taaaaacaag tcatctcact cctgccagtt cacacggacg cgaccgatga
   151981 caataaaaaa aaaacacacc ccccaccagc gaacgcccgc cggcccaacc acctcccctc
   152041 ccacccccgc tcgagtcgcg caggcgcgtc gacgggcagt ccctcggacg cctccacggc
   152101 aacgctcctc ccctgtcccc tcggtccaac ccctcccatc cccctccccg gagcacacac
   152161 gccgactccg tccgcagagg cggcgaccgc agcggcagcg gaaactgtaa cggccacgtt
   152221 ctccgaacag cgacagtaac ggcggcggcg gcggttgtcg ccgtcacggt agtcgtggcg
   152281 gagcacccgg ggaggcgacg acgggcacta ccggcgccga gatcatcgcg ctacgaaaag
   152341 agtagccaat gtaaaaagtt aaaggttctt tgtatatcaa aaaaaaatac tacgtggaaa
   152401 taaaaaataa aaaaaaatat acaatataaa agtgtattat aaaataaaaa cagaataaag
   152461 actagacacc gactaaacgc tcatccttct ccgtacgtcc cctttccgta agtgccaaat
   152521 gccgcatatc catgaacgga cacacgccgg tagaatccga ccttcctcac aacaggtagc
   152581 ccgcgaccta agcacaggac ggtacctgaa accgaaagta taaagggcgg cctcccatgt
   152641 tccgcccatg aggcgggact tcgagacgag ccacccttcg tatacgtccg gcccctcccg
   152701 cgcgcgccta taggacgcac cccctcgttc cgaaaccgct aaagggtaca gtcgccgtca
   152761 caccccctgt ccctagctcg cgacgggccg gcgcagaccc tgcctcggcg gcaaagccga
   152821 gacgagaccc cgacgtacgc gggcataaag aacgagaagt cgacgcgcaa tcccaaatta
   152881 tcgcgagacc gtttgctcgg gcccgccctc gtcctcatgc cctctccccg ccctcatccc
   152941 cttccacacc cggtagacaa aaaaaaacga aaaatacata ggtaaaagta attttcgcgg
   153001 ttaaaaattt gtccacgtga cgtccccggc gattcccgga gatgcgacac gcgacgcatt
   153061 ggcccgttga catcggggtc cgcatacgcg gttcccccgg ggcgtcgcga cgtcggtgcc
   153121 gcagaaaaca ccgcggtccg ccgtcaccct tcagtcacgc gctatttccg cgatcgtata
   153181 atttatctcc accgacacgg gttctgtctg tcacttctca ccgagccgct ccaccaccga
   153241 cagtgtcact gaccacatcg catacgtgct gttttgcctg ttttttgttt atatctccac
   153301 ccctccccgt cacagaccag cgaacacctt gccacatcga catcgactac actcgacctc
   153361 gcatgacaac ggtcgccggt cgcaacgcag ctgcagcggg cggcgaatta aaaaaaaata
   153421 acataaatat agtgaaagag aggcccccgt cccacataag gacagaagaa caggcaaaaa
   153481 aaaaaacccg tccgttattc acgcagcatc cgtaaagcca tgtcgacgcg acacacacag
   153541 aggacgggcg gacgcatccc ggtccggcgc gacagggcgc gactggccca ggcgcgagcc
   153601 cgtgcccgct tcgagtggct actcctggcc cgcggcaggc catccaaact ctacggctat
   153661 gcgagtcggc atcgcggaga actgatccac ctaccgtggc cgccgtgctg gtgtctagaa
   153721 ctccaccacg atccgtacag agacgccaga agtgccaccg tatggggcca ccgctggggt
   153781 tggccgccga cgcacgtgag acccagatgc gttcaagact gcggtgagtg gacgtacggg
   153841 cgagccgcgg ggagggatgt cggtcagaga gtgagtgggt acaaggttcg tcgagaacca
   153901 ccagagacac cggccggtga acagtgggga caaaaaaaac gtcacgtcag gggcggagaa
   153961 atatagggta cgcagaccgt caaacggcga gtaacggaaa aacgagtatg aatacgagga
   154021 ggggggagga aacatagtga agtctgtggc gcgcgggatc gtcaaccggc aaagccgatg
   154081 atggcctccg gccccagaga cggctcgcgg agtggagtcc agttattgtt atgtttttgt
   154141 aatgttttgt ttatccacaa tccggtatcc gtgaatcccc gcggaggtac tttccattaa
   154201 cgatggtaca ggcggtatga cttccggaac acggtgatta cggatatcct gtctcgttta
   154261 cgcgagacct ctttgtttta atctcctata acggtaaaaa aaaaacacaa aagaaagatt
   154321 agagctcctc cttttttatg cgttatggca tcctcgcatc agtcaccatt cctgtggcgt
   154381 gtgcttttcg ctttgaattg tacgcgacag gatccgaatc cgttatactc cgcaagggca
   154441 tagcgaccac ggctgtatgc ggcatctacc gtcgcacggg atgcctttgc gtgtgcagat
   154501 gtgttgtgct ttttttatac ggtcagagac cacagacaaa aataaggcaa cgccagccat
   154561 aacgtttatg gtttcttgtt gttttgtttg ggttatgttc tacgcctctt ctatcgtgtc
   154621 ggccggatcc atcatgttca atcgttcacg tacgcgcgtc ccatcacagc cctagactcc
   154681 tgtctgtacg tatgctgcgg atacggagag aaacttcaac ccgtgggttt cgtaaagtcg
   154741 tatgtaacca actcccagct cgacacgctc cgcgtgctcc tggtgggcaa agacggagcc
   154801 gtgtatgtcc accacatgag agcggcaaga ctctgccgac tggcgtcgag cacaacggag
   154861 tttacaagac gagggctgca acgcgacgcc gtgacgtatg aagaagacct agagctgccg
   154921 gaccagcgta tgtgcggaac gaacgcccga catctgttcg acgtgatcgc cgcggccgcc
   154981 gacgaacaca acctgctgac cgtcggcggc ctgtgtcaga cgcacgccgg agtgtcctgc
   155041 agcttactag agaccgtggg agatccgtgg acggcggttc cggccgcgcg catgactctg
   155101 accgtgccgc aggtccagta ccaattatgg cccgaagccc ggagagacct ccgccggcac
   155161 ctgtacgcgg gacatcccct gggaccgtgg ctcgtgtgcg gcgttctctc gagagagaga
   155221 gagacgcaga ggccgtcgcc tcccataggc agcggcggcg cgactgtagg aaacgtggca
   155281 acgccggggc cacgcgaggt ggagatcgtt tgggtggtct tgactttggc gggaccgctg
   155341 ttagcgttct ggcccgatac cggcaagatc tgtcgtctgg caaactcgtt ctccactcta
   155401 tggaggatgg gaccgcgggc catgagagga cactggacat attcggcccc gggtagacat
   155461 ctccccgggg acgcgtggcc actgtgcgaa cacgtgagac cgcaggtggg aaagcttccc
   155521 aggaagagag cgtacctgga ttagacgtca cagaggtgac gtaagcatgt cacctacggc
   155581 cagagacgtg accggaggaa aatcatgtgt atgtgtgggg tgtgtatgcg tggggtgcgt
   155641 atgcgtgcgc gtactcgttt tctccccccc ttccctttaa ccccacgaaa aataaaatcc
   155701 acgaacgtag acagtcacac acagggtgct tacgctccgt gttactgatg gcaggtaacc
   155761 aaaaaaacgt atgtgtcggg cgtcatgcac cgccgctcta tagcatagtc gctatatcag
   155821 cgcccgatgc caacgcgaca gggtgagtca catagatcgg gactgcttca aagtgcgtcg
   155881 ttcgcctctt atataggcac cccggggggt gggaggagtg aacatccaaa ggaggtgcgt
   155941 ccgggattgg aggcgaacgt agaaaacgaa cagcgtcaga aaaaaataag aaaaggcgga
   156001 gacacatagc cttggcggga agacgacaac aggtttaaaa atagacagtg aaaaaaatag
   156061 cagactgtga cgtccaatac acatgtggcg atcatccaat caacggggtg tatccaggcg
   156121 cagaaacaaa agtatgcgga agtacacacg acacggtaac gcggaccgaa gacagagggc
   156181 gatcgctagc atggcaagtg taagaaaaaa aaaccacgtt ccaaaaacac ctatacggga
   156241 aacatctctt cactccctcc ccgtcccaac caccgcaaca ttcacctccg taatccgttg
   156301 tctacgcgtt tgtaccactg acgcgcagac acgcagacac acagacacga caacccaccc
   156361 atgtggcagt cgcgggtggg tacgtagatg gggcatacgg gggtcagact tgaagacaat
   156421 tcagaacgac atcgcgcgcg acgtgccacc gtctggaacc cacgatctcc tggcacggtg
   156481 ccaaaggaaa ccgccggcca accctaaccc taaccctaac cctaacccta accctaaccc
   156541 taaccctaac cctaacccta accctaaccc taaccctaac cctaacccta accctaaccc
   156601 taaccctaac cctaacccta accctaaccc taaccctaac cctaacccta accctaaccc
   156661 taaccctaac cctaacccta accctaaccc taaccctaac cctaacccta accctaaccc
   156721 taaccctaac cctaacccta accctaaccc taaccctaac cctaacccta accctaaccc
   156781 taaccctaac cctaacccta acccatcccc caacgcgcgc gcgcacgccg ctatgggagg
   156841 cgccgtgttt ttcaccaaca cgcgcgccgc tgcgagagac gcgtg
//
